# Supplementary material for: Urban refuge? Squirrel pigmentation clines maintained by strong natural selection beyond city limits
Source: Research Square preprint supplement (doi:10.21203/rs.3.rs-6967993/v1), 2025-07-08
Supplement: Supplementary file 1 [file 628592b6ceecfd3e594985b1.docx]

| **Table S1.** Model output from best demographic model using whole-genome sequences. Best model estimated a bottleneck in the urban population and 2-way migration between urban and rural populations. | | |
| --- | --- | --- |
| **Best model output** | **Mean value** | **95% CI** |
| Urban Ne | 26248.04 | [23991.94, 28504.14] |
| Rural Ne | 42855.3 | [38195.93 47514.67] |
| Ancestral Ne | 1169873.6 | [1169444.96, 1170302.18] |
| Time of separation (generations) | 18.12 | [14.50, 21.74] |
| Time of urban bottleneck (generations) | 15.51 | [12.18, 18.84] |
| Migration rate rural -> urban (genes/generation) | 0.1111 | [0.1056, 0.1166] |
| Migration rate urban -> rural (genes/generation) | 0.0129 | [0.0123, 0.0136] |
| Migration rate rural -> urban (# individuals) | 2778.49 | [2530.75, 3026.23] |
| Migration rate urban -> rural (# individuals) | 494.64 | [464.96, 524.31] |

**Supplemental Tables**

| **Table S2.** ARG statistics for 746 outlier SNPs detected in the habitat comparison (urban vs. rural). SNPs are grouped into 534 50kb windows. Red shaded cells indicate enrichment scores that were above the significance threshold. Yellow shaded cells RTH scores that were below the significance threshold. Green shaded cells indicated cross coalescent times that were above the significance threshold. | | | | | | | | | |
| --- | --- | --- | --- | --- | --- | --- | --- | --- | --- |
| **peakID** | **chromosome** | **startPos** | **endPos** | **urban_enrich** | **rural_enrich** | **urban_RTH** | **rural_RTH** | **cc_urban_rural** | **Fst** |
| 5_161815000 | 5 | 161790000 | 161840000 | 4.01 | 4.01 | 1 | 0.862 | -0.21 | 0.239502 |
| 6_68475000 | 6 | 68450000 | 68500000 | 5.69 | 2.17 | 0.076 | 1 | -0.5 | 0.224536 |
| 6_68465000 | 6 | 68440000 | 68490000 | 5.69 | 2.17 | 0.076 | 1 | -0.46 | 0.223936 |
| 2_129615000 | 2 | 129590000 | 129640000 | 4.48 | 4.48 | 1 | 1 | 0.37 | 0.223858 |
| 6_69475000 | 6 | 69450000 | 69500000 | 3.58 | 1.76 | 0.278 | 1 | 0.19 | 0.222912 |
| 5_117535000 | 5 | 117510000 | 117560000 | 1.25 | 4.48 | 1 | 1 | -0.02 | 0.21984 |
| 6_68455000 | 6 | 68430000 | 68480000 | 5.69 | 1.63 | 0.076 | 1 | -0.41 | 0.214291 |
| 5_55665000 | 5 | 55640000 | 55690000 | 5.12 | 1.82 | 0.71 | 1 | -0.21 | 0.213681 |
| 10_84345000 | 10 | 84320000 | 84370000 | 2.35 | 2.17 | 1 | 1 | -0.03 | 0.212124 |
| 5_161875000 | 5 | 161850000 | 161900000 | 7.46 | 7.62 | 0.723 | 0.539 | -0.25 | 0.209966 |
| 6_78415000 | 6 | 78390000 | 78440000 | 3.36 | 3.66 | 1 | 1 | -0.13 | 0.209125 |
| 6_78345000 | 6 | 78320000 | 78370000 | 2.82 | 3 | 1 | 0.516 | -0.22 | 0.205229 |
| 5_162015000 | 5 | 161990000 | 162040000 | 4.39 | 3.04 | 0.278 | 1 | -0.49 | 0.204987 |
| 5_161935000 | 5 | 161910000 | 161960000 | 6.91 | 7.3 | 1 | 0.539 | 0.1 | 0.203515 |
| 5_162025000 | 5 | 1.62E+08 | 162050000 | 4.39 | 3.04 | 0.278 | 1 | -0.26 | 0.202579 |
| 1_115155000 | 1 | 115130000 | 115180000 | 2.75 | 2.84 | 1 | 0.539 | -0.15 | 0.201133 |
| 6_69485000 | 6 | 69460000 | 69510000 | 4.2 | 1.76 | 0.278 | 1 | -0.01 | 0.199753 |
| 6_68495000 | 6 | 68470000 | 68520000 | 5.69 | 2.17 | 0.088 | 1 | -0.5 | 0.197124 |
| 8_54535000 | 8 | 54510000 | 54560000 | 3.7 | 4.9 | 0.862 | 0.539 | -0.34 | 0.194191 |
| 5_32105000 | 5 | 32080000 | 32130000 | 5.12 | 2.85 | 0.047 | 1 | -0.5 | 0.193889 |
| 5_55635000 | 5 | 55610000 | 55660000 | 4.48 | 1.69 | 0.516 | 1 | -0.18 | 0.193105 |
| 6_68665000 | 6 | 68640000 | 68690000 | 3.71 | 4.77 | 0.539 | 1 | 0 | 0.19032 |
| 8_54515000 | 8 | 54490000 | 54540000 | 4 | 4.9 | 0.862 | 0.539 | -0.36 | 0.190018 |
| 6_77035000 | 6 | 77010000 | 77060000 | 2.97 | 1.95 | 0.539 | 1 | 0.41 | 0.188598 |
| 6_68675000 | 6 | 68650000 | 68700000 | 3.71 | 4.77 | 0.539 | 1 | -0.35 | 0.188593 |
| 5_162105000 | 5 | 162080000 | 162130000 | 3.79 | 3.79 | 0.539 | 0.539 | -0.18 | 0.188056 |
| 6_78405000 | 6 | 78380000 | 78430000 | 3.36 | 3.66 | 1 | 0.516 | -0.16 | 0.186722 |
| 6_68445000 | 6 | 68420000 | 68470000 | 5.69 | 1.63 | 0.076 | 1 | -0.39 | 0.186524 |
| 6_68755000 | 6 | 68730000 | 68780000 | 3.98 | 4.14 | 0.539 | 1 | -0.11 | 0.185985 |
| 2_6845000 | 2 | 6820000 | 6870000 | 3.64 | 2.46 | 0.539 | 1 | 0.38 | 0.185953 |
| 6_78435000 | 6 | 78410000 | 78460000 | 3.36 | 3.66 | 1 | 0.516 | -0.07 | 0.184913 |
| 6_72095000 | 6 | 72070000 | 72120000 | 1.97 | 4.56 | 1 | 1 | -0.34 | 0.182558 |
| 6_68685000 | 6 | 68660000 | 68710000 | 3.71 | 3.71 | 0.539 | 1 | -0.31 | 0.181741 |
| 6_77025000 | 6 | 7.70E+07 | 77050000 | 2.97 | 2.84 | 0.539 | 1 | -0.35 | 0.181367 |
| 6_68745000 | 6 | 68720000 | 68770000 | 3.98 | 4.14 | 0.539 | 1 | -0.15 | 0.181021 |
| 5_32135000 | 5 | 32110000 | 32160000 | 3.56 | 2.35 | 0.047 | 1 | -0.5 | 0.177436 |
| 5_59775000 | 5 | 59750000 | 59800000 | 2.74 | 2.37 | 0.516 | 1 | -0.37 | 0.176041 |
| 10_36025000 | 10 | 3.60E+07 | 36050000 | 3.11 | 2.75 | 0.816 | 1 | -0.25 | 0.175693 |
| 6_58345000 | 6 | 58320000 | 58370000 | 3.24 | 3.85 | 0.539 | 1 | 0.09 | 0.175148 |
| 5_162085000 | 5 | 162060000 | 162110000 | 3.79 | 3.79 | 0.816 | 1 | -0.13 | 0.175147 |
| 1_120515000 | 1 | 120490000 | 120540000 | 1.61 | 3.31 | 1 | 0.539 | -0.46 | 0.174428 |
| 6_68285000 | 6 | 68260000 | 68310000 | 3.84 | 2.74 | 0.131 | 1 | -0.02 | 0.17299 |
| 6_77855000 | 6 | 77830000 | 77880000 | 5.08 | 3.17 | 0.77 | 1 | -0.06 | 0.172619 |
| 6_68515000 | 6 | 68490000 | 68540000 | 4.4 | 2.17 | 0.103 | 1 | -0.37 | 0.172201 |
| 5_162195000 | 5 | 162170000 | 162220000 | 2.47 | 3.32 | 1 | 1 | -0.39 | 0.170213 |
| 1_120505000 | 1 | 120480000 | 120530000 | 1.61 | 3.31 | 1 | 0.539 | -0.47 | 0.169884 |
| 6_58355000 | 6 | 58330000 | 58380000 | 3.24 | 3.85 | 0.539 | 1 | 0.43 | 0.169852 |
| 5_31545000 | 5 | 31520000 | 31570000 | 2.84 | 1.01 | 0 | 1 | -0.5 | 0.168759 |
| 2_6825000 | 2 | 6800000 | 6850000 | 3.6 | 2.34 | 0.539 | 1 | -0.26 | 0.167767 |
| 6_68245000 | 6 | 68220000 | 68270000 | 3.6 | 3.95 | 0.131 | 1 | 0.37 | 0.167614 |
| 2_129595000 | 2 | 129570000 | 129620000 | 4.48 | 4.48 | 1 | 1 | 0.43 | 0.166663 |
| 16_66405000 | 16 | 66380000 | 66430000 | 2.7 | 3.43 | 0.516 | 1 | -0.41 | 0.166387 |
| 1_120475000 | 1 | 120450000 | 120500000 | 1.67 | 2.95 | 1 | 0.539 | -0.46 | 0.166259 |
| 6_66885000 | 6 | 66860000 | 66910000 | 3.16 | 2.26 | 0.242 | 1 | -0.5 | 0.164963 |
| 2_7395000 | 2 | 7370000 | 7420000 | 3.1 | 1.92 | 1 | 1 | -0.33 | 0.164946 |
| 6_74325000 | 6 | 74300000 | 74350000 | 3.75 | 2.26 | 0.131 | 1 | -0.45 | 0.163429 |
| 6_72955000 | 6 | 72930000 | 72980000 | 3.54 | 2.42 | 1 | 1 | -0.13 | 0.162743 |
| 6_74915000 | 6 | 74890000 | 74940000 | 4.82 | 2.52 | 0.278 | 1 | -0.47 | 0.162346 |
| 5_122225000 | 5 | 122200000 | 122250000 | 1.88 | 1.66 | 1 | 1 | -0.23 | 0.162325 |
| 5_117355000 | 5 | 117330000 | 117380000 | 3.6 | 2.02 | 0.516 | 1 | 0.27 | 0.162153 |
| 6_68315000 | 6 | 68290000 | 68340000 | 3.84 | 1.92 | 0.131 | 1 | -0.05 | 0.161871 |
| 5_116975000 | 5 | 116950000 | 1.17E+08 | 2.22 | 2.66 | 1 | 1 | -0.23 | 0.161464 |
| 6_77045000 | 6 | 77020000 | 77070000 | 3.73 | 3.36 | 0.539 | 1 | 0.42 | 0.160589 |
| 1_120385000 | 1 | 120360000 | 120410000 | 1.51 | 3.56 | 1 | 0.816 | -0.44 | 0.160245 |
| 1_120225000 | 1 | 120200000 | 120250000 | 2.46 | 4.57 | 1 | 0.539 | -0.26 | 0.160242 |
| 1_120395000 | 1 | 120370000 | 120420000 | 1.43 | 3.56 | 1 | 0.539 | -0.43 | 0.159344 |
| 6_68325000 | 6 | 68300000 | 68350000 | 3.6 | 1.8 | 0.131 | 1 | -0.28 | 0.158318 |
| 6_77865000 | 6 | 77840000 | 77890000 | 5.08 | 3.17 | 0.77 | 1 | -0.04 | 0.1581 |
| 6_74905000 | 6 | 74880000 | 74930000 | 3.42 | 2.52 | 0.278 | 1 | -0.49 | 0.157454 |
| 6_68535000 | 6 | 68510000 | 68560000 | 3.11 | 2.01 | 0.585 | 1 | 0.14 | 0.157412 |
| 2_8075000 | 2 | 8050000 | 8100000 | 3.24 | 2.7 | 0.865 | 1 | -0.13 | 0.155433 |
| 1_115475000 | 1 | 115450000 | 115500000 | 4.65 | 5.55 | 0.539 | 1 | -0.38 | 0.153816 |
| 6_129085000 | 6 | 129060000 | 129110000 | 2.22 | 3.08 | 1 | 1 | 0.43 | 0.153766 |
| 1_120455000 | 1 | 120430000 | 120480000 | 1.67 | 2.95 | 0.539 | 0.539 | 0.49 | 0.153564 |
| 5_162205000 | 5 | 162180000 | 162230000 | 2.47 | 2.31 | 0.908 | 1 | -0.39 | 0.153397 |
| 6_68165000 | 6 | 68140000 | 68190000 | 3.52 | 2.09 | 0.278 | 1 | -0.43 | 0.152837 |
| 3_113355000 | 3 | 113330000 | 113380000 | 1.91 | 3.71 | 1 | 1 | -0.34 | 0.152539 |
| 2_7405000 | 2 | 7380000 | 7430000 | 3.1 | 2.38 | 1 | 1 | 0.37 | 0.1521 |
| 6_68565000 | 6 | 68540000 | 68590000 | 3.11 | 2.01 | 0.539 | 1 | 0.35 | 0.151671 |
| 6_75075000 | 6 | 75050000 | 75100000 | 5.75 | 1.95 | 0.278 | 1 | 0.35 | 0.150441 |
| 6_77575000 | 6 | 77550000 | 77600000 | 3.88 | 3.56 | 1 | 0.539 | -0.1 | 0.150434 |
| 1_115465000 | 1 | 115440000 | 115490000 | 4.65 | 5.55 | 0.539 | 1 | -0.36 | 0.150363 |
| 5_55685000 | 5 | 55660000 | 55710000 | 5.12 | 1.82 | 1 | 1 | -0.22 | 0.150062 |
| 2_6195000 | 2 | 6170000 | 6220000 | 5.33 | 4.41 | 1 | 1 | -0.42 | 0.149855 |
| 5_27075000 | 5 | 27050000 | 27100000 | 1.97 | 4.77 | 0.278 | 1 | 0.15 | 0.149827 |
| 6_79295000 | 6 | 79270000 | 79320000 | 3.24 | 3.41 | 1 | 1 | -0.34 | 0.14899 |
| 8_54485000 | 8 | 54460000 | 54510000 | 4 | 4.9 | 1 | 0.539 | -0.04 | 0.148855 |
| 6_68905000 | 6 | 68880000 | 68930000 | 3.7 | 2.84 | 0.278 | 1 | -0.07 | 0.148582 |
| 8_54555000 | 8 | 54530000 | 54580000 | 2.88 | 3.15 | 0.862 | 0.539 | -0.31 | 0.147665 |
| 5_32075000 | 5 | 32050000 | 32100000 | 5.12 | 4.03 | 0.047 | 1 | -0.5 | 0.147111 |
| 6_74895000 | 6 | 74870000 | 74920000 | 3.33 | 2.52 | 0.278 | 1 | -0.47 | 0.146983 |
| 6_58285000 | 6 | 58260000 | 58310000 | 3.85 | 2.79 | 0.278 | 1 | -0.4 | 0.146951 |
| 6_72965000 | 6 | 72940000 | 72990000 | 2.42 | 2 | 1 | 1 | -0.14 | 0.146939 |
| 2_8105000 | 2 | 8080000 | 8130000 | 3.28 | 1.92 | 1 | 1 | -0.1 | 0.146525 |
| 5_117375000 | 5 | 117350000 | 117400000 | 3.6 | 2.02 | 0.516 | 1 | -0.01 | 0.146335 |
| 9_80385000 | 9 | 80360000 | 80410000 | 2.02 | 3.28 | 1 | 1 | 0.44 | 0.146321 |
| 5_32045000 | 5 | 32020000 | 32070000 | 4.83 | 4.03 | 0.047 | 1 | -0.5 | 0.146291 |
| 6_67525000 | 6 | 67500000 | 67550000 | 2.2 | 1.79 | 0.516 | 1 | -0.48 | 0.146273 |
| 5_55705000 | 5 | 55680000 | 55730000 | 5.12 | 1.82 | 0.516 | 1 | -0.23 | 0.144703 |
| 2_7215000 | 2 | 7190000 | 7240000 | 3.5 | 3.25 | 0.539 | 1 | -0.4 | 0.144479 |
| 10_40415000 | 10 | 40390000 | 40440000 | 2.83 | 2.74 | 1 | 1 | -0.08 | 0.144278 |
| 11_121175000 | 11 | 121150000 | 121200000 | 3.24 | 2.35 | 0.539 | 1 | 0.42 | 0.143881 |
| 6_68595000 | 6 | 68570000 | 68620000 | 2.87 | 1.74 | 0.539 | 1 | 0.24 | 0.143474 |
| 6_73695000 | 6 | 73670000 | 73720000 | 4.26 | 3.66 | 0.539 | 1 | 0.3 | 0.143363 |
| 12_97905000 | 12 | 97880000 | 97930000 | 1.79 | 2.38 | 0.862 | 1 | -0.36 | 0.141162 |
| 5_33995000 | 5 | 33970000 | 34020000 | 3.42 | 2.38 | 0.088 | 1 | -0.47 | 0.141044 |
| 6_68915000 | 6 | 68890000 | 68940000 | 3.7 | 2.84 | 0.357 | 1 | -0.05 | 0.140836 |
| 6_129095000 | 6 | 129070000 | 129120000 | 2.22 | 3.08 | 1 | 1 | 0.43 | 0.140759 |
| 6_69965000 | 6 | 69940000 | 69990000 | 3.22 | 2.06 | 0.131 | 1 | -0.41 | 0.140694 |
| 4_49645000 | 4 | 49620000 | 49670000 | 3.67 | 1.49 | 0.865 | 1 | -0.38 | 0.140568 |
| 6_75095000 | 6 | 75070000 | 75120000 | 5.75 | 2.45 | 0.631 | 1.171 | 0.44 | 0.140144 |
| 13_90495000 | 13 | 90470000 | 90520000 | 4.39 | 3.41 | 0.297 | 0.551 | 0.17 | 0.140054 |
| 6_67565000 | 6 | 67540000 | 67590000 | 2.71 | 2.7 | 0.806 | 1 | 0.49 | 0.139731 |
| 1_115455000 | 1 | 115430000 | 115480000 | 4.65 | 5.55 | 0.539 | 1 | -0.35 | 0.139398 |
| 6_73715000 | 6 | 73690000 | 73740000 | 2.36 | 3.4 | 0.539 | 1 | 0.5 | 0.139307 |
| 8_14045000 | 8 | 14020000 | 14070000 | 2.58 | 1.92 | 1 | 1 | -0.43 | 0.139102 |
| 5_55715000 | 5 | 55690000 | 55740000 | 5.12 | 1.82 | 0.516 | 1 | -0.23 | 0.138541 |
| 6_58045000 | 6 | 58020000 | 58070000 | 5.41 | 5.41 | 0.278 | 1 | -0.07 | 0.137331 |
| 6_58055000 | 6 | 58030000 | 58080000 | 5.41 | 5.41 | 0.278 | 1 | -0.1 | 0.136393 |
| 13_90485000 | 13 | 90460000 | 90510000 | 4.39 | 3.41 | 0.297 | 0.551 | 0.12 | 0.136248 |
| 6_76455000 | 6 | 76430000 | 76480000 | 5.22 | 5.22 | 0.539 | 1 | -0.08 | 0.136173 |
| 6_56995000 | 6 | 56970000 | 57020000 | 2.05 | 3.66 | 1 | 1 | 0.32 | 0.135552 |
| 2_7685000 | 2 | 7660000 | 7710000 | 3.16 | 3.29 | 0.551 | 1 | -0.29 | 0.135439 |
| 6_75515000 | 6 | 75490000 | 75540000 | 4 | 2.89 | 0.539 | 1 | -0.3 | 0.13496 |
| 5_32985000 | 5 | 32960000 | 33010000 | 2.39 | 2.95 | 0.131 | 1 | -0.44 | 0.134587 |
| 1_115485000 | 1 | 115460000 | 115510000 | 4.65 | 5.55 | 0.539 | 1 | -0.4 | 0.134563 |
| 6_77875000 | 6 | 77850000 | 77900000 | 3.71 | 3.17 | 1 | 1 | -0.02 | 0.134463 |
| 1_56725000 | 1 | 56700000 | 56750000 | 2.58 | 3.7 | 0.539 | 1 | -0.5 | 0.134436 |
| 6_69955000 | 6 | 69930000 | 69980000 | 3.22 | 2.06 | 0.131 | 1 | -0.4 | 0.134254 |
| 5_32865000 | 5 | 32840000 | 32890000 | 2.74 | 4.04 | 0.131 | 0.908 | -0.36 | 0.134 |
| 8_45855000 | 8 | 45830000 | 45880000 | 3.6 | 2.76 | 0.278 | 1 | -0.33 | 0.133789 |
| 6_76485000 | 6 | 76460000 | 76510000 | 5.22 | 5.22 | 0.539 | 1 | -0.16 | 0.133167 |
| 5_65475000 | 5 | 65450000 | 65500000 | 2.79 | 1.53 | 0.516 | 1 | -0.26 | 0.133023 |
| 6_77065000 | 6 | 77040000 | 77090000 | 3.73 | 3.92 | 0.539 | 1 | -0.36 | 0.132653 |
| 5_55495000 | 5 | 55470000 | 55520000 | 2.65 | 2.38 | 0.539 | 1 | -0.16 | 0.132488 |
| 1_56715000 | 1 | 56690000 | 56740000 | 2.58 | 2.78 | 0.539 | 1 | -0.49 | 0.132229 |
| 6_68605000 | 6 | 68580000 | 68630000 | 2.87 | 3.32 | 0.539 | 1 | 0.25 | 0.132219 |
| 1_114205000 | 1 | 114180000 | 114230000 | 2.98 | 4.98 | 0.539 | 0.539 | 0.5 | 0.132181 |
| 2_7335000 | 2 | 7310000 | 7360000 | 3.24 | 2.03 | 0.539 | 1 | -0.26 | 0.132001 |
| 8_54565000 | 8 | 54540000 | 54590000 | 2.13 | 3.15 | 1 | 0.539 | -0.3 | 0.131242 |
| 6_74355000 | 6 | 74330000 | 74380000 | 3.88 | 2.26 | 0.131 | 1 | -0.44 | 0.131183 |
| 6_115715000 | 6 | 115690000 | 115740000 | 2.27 | 3.32 | 1 | 1 | -0.22 | 0.131169 |
| 2_7695000 | 2 | 7670000 | 7720000 | 3.16 | 3.09 | 0.551 | 1 | -0.29 | 0.131096 |
| 6_80315000 | 6 | 80290000 | 80340000 | 3.77 | 4.56 | 0.539 | 0.677 | -0.14 | 0.130929 |
| 5_32885000 | 5 | 32860000 | 32910000 | 2.74 | 1.99 | 0.131 | 1 | 0.48 | 0.130728 |
| 5_33985000 | 5 | 33960000 | 34010000 | 3.42 | 2.38 | 0.088 | 1 | -0.48 | 0.130279 |
| 1_168615000 | 1 | 168590000 | 168640000 | 4.32 | 4.32 | 1 | 1 | -0.01 | 0.130098 |
| 5_134605000 | 5 | 134580000 | 134630000 | 4.16 | 3.41 | 0.539 | 1 | 0.45 | 0.129977 |
| 6_67225000 | 6 | 67200000 | 67250000 | 3.27 | 3.05 | 0.088 | 1 | -0.47 | 0.129937 |
| 3_29655000 | 3 | 29630000 | 29680000 | 3.09 | 3.35 | 0.297 | 1 | -0.09 | 0.129712 |
| 14_59725000 | 14 | 59700000 | 59750000 | 3.36 | 3.37 | 0.539 | 0.539 | -0.28 | 0.12869 |
| 9_128615000 | 9 | 128590000 | 128640000 | 3.31 | 3.32 | 1 | 1 | -0.18 | 0.128647 |
| 15_71065000 | 15 | 71040000 | 71090000 | 2.03 | 3.08 | 0.516 | 1 | -0.46 | 0.128473 |
| 6_115725000 | 6 | 115700000 | 115750000 | 2.88 | 3.32 | 1 | 1 | -0.21 | 0.128315 |
| 5_46865000 | 5 | 46840000 | 46890000 | 3.57 | 1.64 | 0.278 | 1 | -0.42 | 0.128202 |
| 6_59725000 | 6 | 59700000 | 59750000 | 2.7 | 1.29 | 1 | 1 | -0.45 | 0.128038 |
| 8_38815000 | 8 | 38790000 | 38840000 | 1.39 | 2.44 | 1 | 1 | -0.39 | 0.127774 |
| 6_59715000 | 6 | 59690000 | 59740000 | 2.7 | 1.26 | 1 | 1 | -0.08 | 0.127582 |
| 6_80335000 | 6 | 80310000 | 80360000 | 3.97 | 3.29 | 0.539 | 0.677 | -0.02 | 0.127507 |
| 6_76765000 | 6 | 76740000 | 76790000 | 3.61 | 2.19 | 1 | 1 | 0.33 | 0.127061 |
| 6_69735000 | 6 | 69710000 | 69760000 | 3.38 | 2.03 | 0.047 | 1 | -0.14 | 0.12702 |
| 6_75535000 | 6 | 75510000 | 75560000 | 3.15 | 2.89 | 0.539 | 1 | -0.35 | 0.126787 |
| 5_101715000 | 5 | 101690000 | 101740000 | 2.62 | 5.73 | 1 | 1 | -0.02 | 0.126442 |
| 6_115685000 | 6 | 115660000 | 115710000 | 2.34 | 3.17 | 1 | 1 | -0.25 | 0.126312 |
| 6_59235000 | 6 | 59210000 | 59260000 | 3.75 | 1.95 | 0.539 | 1 | -0.13 | 0.126255 |
| 3_31685000 | 3 | 31660000 | 31710000 | 3.4 | 3.39 | 1 | 0.686 | -0.36 | 0.126241 |
| 6_59985000 | 6 | 59960000 | 60010000 | 4.2 | 3.23 | 1 | 1 | -0.04 | 0.125837 |
| 7_32825000 | 7 | 32800000 | 32850000 | 3.42 | 3.25 | 0.539 | 1 | -0.29 | 0.125626 |
| 7_148225000 | 7 | 148200000 | 148250000 | 2.65 | 2.27 | 0.551 | 0.955 | 0.35 | 0.125404 |
| 6_76785000 | 6 | 76760000 | 76810000 | 3.76 | 2.46 | 1 | 1 | 0.4 | 0.124821 |
| 5_63685000 | 5 | 63660000 | 63710000 | 2.74 | 2.33 | 1 | 1 | -0.02 | 0.124528 |
| 5_122205000 | 5 | 122180000 | 122230000 | 2.65 | 1.64 | 1 | 1 | -0.27 | 0.124254 |
| 6_74745000 | 6 | 74720000 | 74770000 | 2.01 | 1.65 | 0.539 | 1 | -0.01 | 0.124204 |
| 6_68945000 | 6 | 68920000 | 68970000 | 4.02 | 2.84 | 0.357 | 1 | 0.2 | 0.124046 |
| 6_79335000 | 6 | 79310000 | 79360000 | 3.38 | 1.81 | 1 | 1 | 0.46 | 0.123857 |
| 5_57685000 | 5 | 57660000 | 57710000 | 2.08 | 3.42 | 0.278 | 1 | -0.43 | 0.123849 |
| 11_121185000 | 11 | 121160000 | 121210000 | 3.64 | 2.35 | 0.539 | 1 | 0.4 | 0.123771 |
| 13_77625000 | 13 | 77600000 | 77650000 | 1.98 | 2.06 | 0.585 | 0.539 | -0.36 | 0.123343 |
| 6_77465000 | 6 | 77440000 | 77490000 | 2.8 | 3.6 | 0.908 | 1 | -0.17 | 0.123211 |
| 2_8445000 | 2 | 8420000 | 8470000 | 2.77 | 2.61 | 0.551 | 1 | -0.43 | 0.123033 |
| 6_59225000 | 6 | 59200000 | 59250000 | 3.75 | 1.95 | 0.539 | 1 | -0.09 | 0.122785 |
| 6_77745000 | 6 | 77720000 | 77770000 | 2.57 | 3.38 | 0.539 | 1 | -0.01 | 0.122677 |
| 6_79345000 | 6 | 79320000 | 79370000 | 3.38 | 1.81 | 1 | 1 | 0.26 | 0.122615 |
| 6_58475000 | 6 | 58450000 | 58500000 | 3.04 | 2.66 | 0.539 | 1 | -0.43 | 0.122126 |
| 8_69845000 | 8 | 69820000 | 69870000 | 1.81 | 2.24 | 1 | 1 | -0.02 | 0.121878 |
| 2_7725000 | 2 | 7700000 | 7750000 | 4.07 | 2.64 | 0.072 | 1 | 0.14 | 0.121872 |
| 9_128405000 | 9 | 128380000 | 128430000 | 2.5 | 2.2 | 0.686 | 1 | -0.05 | 0.121809 |
| 6_76425000 | 6 | 76400000 | 76450000 | 4.51 | 4.51 | 0.539 | 1 | -0.12 | 0.121664 |
| 6_75765000 | 6 | 75740000 | 75790000 | 3.25 | 1.92 | 0.539 | 1 | -0.43 | 0.12159 |
| 6_74735000 | 6 | 74710000 | 74760000 | 2.01 | 1.58 | 0.539 | 1 | -0.17 | 0.121314 |
| 5_117495000 | 5 | 117470000 | 117520000 | 2.59 | 3.76 | 1 | 1 | -0.47 | 0.121263 |
| 6_67205000 | 6 | 67180000 | 67230000 | 3.76 | 3.76 | 0.088 | 1 | -0.47 | 0.121039 |
| 8_64185000 | 8 | 64160000 | 64210000 | 1.51 | 1.6 | 1 | 1 | 0.44 | 0.120284 |
| 5_59825000 | 5 | 59800000 | 59850000 | 4.26 | 2.37 | 0.516 | 1 | -0.31 | 0.120283 |
| 6_58485000 | 6 | 58460000 | 58510000 | 4.03 | 2.66 | 0.539 | 1 | -0.43 | 0.119999 |
| 2_6155000 | 2 | 6130000 | 6180000 | 2.35 | 2.24 | 0.539 | 1 | -0.43 | 0.119778 |
| 6_82695000 | 6 | 82670000 | 82720000 | 2.07 | 1.74 | 0.862 | 1 | -0.37 | 0.119652 |
| 6_67185000 | 6 | 67160000 | 67210000 | 3.76 | 3.76 | 0.088 | 1 | -0.47 | 0.119504 |
| 5_31685000 | 5 | 31660000 | 31710000 | 3.82 | 3.44 | 0 | 1 | -0.5 | 0.119432 |
| 10_94785000 | 10 | 94760000 | 94810000 | 3.6 | 3.03 | 1 | 1 | -0.03 | 0.119359 |
| 6_87525000 | 6 | 87500000 | 87550000 | 2.76 | 2.76 | 0.278 | 1 | -0.29 | 0.118749 |
| 1_118535000 | 1 | 118510000 | 118560000 | 2.17 | 2.16 | 0.908 | 1 | -0.35 | 0.118291 |
| 9_128585000 | 9 | 128560000 | 128610000 | 3.31 | 3.32 | 1 | 1 | -0.14 | 0.118247 |
| 3_31675000 | 3 | 31650000 | 31700000 | 3.4 | 3.39 | 1 | 0.686 | -0.38 | 0.11819 |
| 6_79165000 | 6 | 79140000 | 79190000 | 4.3 | 3.71 | 1 | 1 | -0.25 | 0.118175 |
| 6_76805000 | 6 | 76780000 | 76830000 | 4.64 | 2.46 | 1 | 1 | 0.45 | 0.117962 |
| 6_59545000 | 6 | 59520000 | 59570000 | 3.11 | 2.69 | 0.539 | 0.723 | -0.17 | 0.117891 |
| 6_69515000 | 6 | 69490000 | 69540000 | 4.2 | 1.89 | 0.278 | 1 | -0.06 | 0.117373 |
| 5_32975000 | 5 | 32950000 | 3.30E+07 | 2.39 | 2.7 | 0.131 | 1 | -0.44 | 0.117365 |
| 5_134705000 | 5 | 134680000 | 134730000 | 1.78 | 2.37 | 1 | 1 | -0.38 | 0.117222 |
| 11_77335000 | 11 | 77310000 | 77360000 | 3.32 | 2.84 | 1 | 1 | -0.46 | 0.1172 |
| 6_69435000 | 6 | 69410000 | 69460000 | 3.58 | 2.09 | 0.278 | 1 | -0.48 | 0.11696 |
| 6_74775000 | 6 | 74750000 | 74800000 | 4.51 | 3.13 | 0.539 | 1 | -0.08 | 0.116936 |
| 6_74925000 | 6 | 74900000 | 74950000 | 4.82 | 3.39 | 0.278 | 1 | -0.47 | 0.116861 |
| 14_41875000 | 14 | 41850000 | 41900000 | 2.22 | 2.34 | 1 | 1 | -0.11 | 0.116825 |
| 2_7085000 | 2 | 7060000 | 7110000 | 3.33 | 6.44 | 0.539 | 1 | 0.45 | 0.1165 |
| 1_188355000 | 1 | 188330000 | 188380000 | 4.82 | 3.08 | 1 | 1 | -0.47 | 0.116418 |
| 8_141755000 | 8 | 141730000 | 141780000 | 1.53 | 2 | 0.865 | 1 | -0.07 | 0.116416 |
| 9_128415000 | 9 | 128390000 | 128440000 | 2.5 | 2.58 | 0.686 | 1 | 0.05 | 0.116413 |
| 6_76495000 | 6 | 76470000 | 76520000 | 4.14 | 4.13 | 0.539 | 1 | -0.2 | 0.116393 |
| 10_70445000 | 10 | 70420000 | 70470000 | 3.17 | 3 | 0.278 | 1 | 0.4 | 0.116144 |
| 6_130795000 | 6 | 130770000 | 130820000 | 4.35 | 4.34 | 1 | 1 | -0.2 | 0.116135 |
| 6_78035000 | 6 | 78010000 | 78060000 | 3.02 | 2.84 | 1 | 1 | -0.28 | 0.116066 |
| 6_69925000 | 6 | 69900000 | 69950000 | 2.88 | 2.06 | 0.539 | 1 | 0.45 | 0.115805 |
| 6_77735000 | 6 | 77710000 | 77760000 | 2.75 | 1.95 | 0.539 | 1 | -0.03 | 0.115615 |
| 2_8465000 | 2 | 8440000 | 8490000 | 2.77 | 2.32 | 0.551 | 1 | -0.24 | 0.115313 |
| 6_69125000 | 6 | 69100000 | 69150000 | 2.52 | 1.69 | 0.585 | 1 | -0.43 | 0.114335 |
| 1_122945000 | 1 | 122920000 | 122970000 | 3.2 | 3.27 | 1 | 1 | -0.35 | 0.114015 |
| 2_7675000 | 2 | 7650000 | 7700000 | 3.16 | 3.29 | 0.297 | 1 | -0.29 | 0.114011 |
| 2_8365000 | 2 | 8340000 | 8390000 | 3.09 | 2.39 | 0.551 | 1 | -0.42 | 0.113898 |
| 14_57815000 | 14 | 57790000 | 57840000 | 1.91 | 3.93 | 1 | 1 | -0.2 | 0.113853 |
| 6_78045000 | 6 | 78020000 | 78070000 | 3.02 | 2.84 | 1 | 1 | -0.3 | 0.113681 |
| 8_45835000 | 8 | 45810000 | 45860000 | 3.76 | 2.38 | 0.278 | 1 | -0.38 | 0.113537 |
| 6_131115000 | 6 | 131090000 | 131140000 | 3.18 | 2.54 | 0.677 | 0.947 | -0.11 | 0.113435 |
| 1_115245000 | 1 | 115220000 | 115270000 | 3.92 | 5.14 | 1 | 0.539 | -0.36 | 0.112971 |
| 1_114455000 | 1 | 114430000 | 114480000 | 4.34 | 3.24 | 0.278 | 1 | -0.19 | 0.112802 |
| 6_117215000 | 6 | 117190000 | 117240000 | 1.82 | 2.03 | 0.641 | 0.641 | -0.02 | 0.112791 |
| 6_72345000 | 6 | 72320000 | 72370000 | 4.15 | 2.92 | 0.278 | 1 | -0.36 | 0.112694 |
| 11_128015000 | 11 | 127990000 | 128040000 | 3.84 | 2.28 | 1 | 1 | -0.32 | 0.112592 |
| 17_925000 | 17 | 9.00E+05 | 950000 | 1.75 | 2.1 | 1 | 1 | -0.14 | 0.112558 |
| 10_71055000 | 10 | 71030000 | 71080000 | 4.59 | 2.99 | 0.539 | 1 | 0.45 | 0.112557 |
| 8_13055000 | 8 | 13030000 | 13080000 | 3.36 | 2.74 | 0.539 | 0.861 | -0.13 | 0.112551 |
| 5_90715000 | 5 | 90690000 | 90740000 | 1.82 | 1.54 | 1 | 1 | -0.23 | 0.112371 |
| 1_52985000 | 1 | 52960000 | 53010000 | 1.28 | 3.25 | 1 | 1 | -0.06 | 0.112369 |
| 6_58465000 | 6 | 58440000 | 58490000 | 3.04 | 2.66 | 0.539 | 1 | -0.44 | 0.112134 |
| 6_75335000 | 6 | 75310000 | 75360000 | 3.44 | 3 | 0.278 | 1 | -0.32 | 0.112071 |
| 6_74795000 | 6 | 74770000 | 74820000 | 4.63 | 3.42 | 0.539 | 1 | 0.43 | 0.112031 |
| 6_76015000 | 6 | 75990000 | 76040000 | 2.13 | 1.72 | 0.131 | 1 | -0.5 | 0.111954 |
| 1_101895000 | 1 | 101870000 | 101920000 | 2.72 | 2.25 | 1 | 1 | -0.18 | 0.111904 |
| 8_113205000 | 8 | 113180000 | 113230000 | 1.81 | 2.49 | 0.551 | 1 | -0.09 | 0.11182 |
| 8_83355000 | 8 | 83330000 | 83380000 | 2.2 | 3.23 | 1 | 1 | -0.4 | 0.11157 |
| 6_81485000 | 6 | 81460000 | 81510000 | 3.71 | 3.71 | 0.631 | 0.816 | 0.37 | 0.1115 |
| 5_37365000 | 5 | 37340000 | 37390000 | 3 | 1.99 | 0.539 | 1 | -0.29 | 0.111418 |
| 6_69905000 | 6 | 69880000 | 69930000 | 3.22 | 1.62 | 0.539 | 1 | -0.42 | 0.111361 |
| 8_89175000 | 8 | 89150000 | 89200000 | 2.38 | 3.49 | 0.539 | 1 | -0.3 | 0.111049 |
| 9_128625000 | 9 | 128600000 | 128650000 | 3.77 | 3.32 | 1 | 1 | -0.22 | 0.110983 |
| 6_69025000 | 6 | 6.90E+07 | 69050000 | 7.21 | 4.17 | 0.278 | 1 | 0.42 | 0.11091 |
| 6_117205000 | 6 | 117180000 | 117230000 | 2.98 | 2.03 | 0.278 | 1 | -0.4 | 0.110896 |
| 6_75995000 | 6 | 75970000 | 76020000 | 1.86 | 1.38 | 0.539 | 1 | -0.49 | 0.110833 |
| 6_131125000 | 6 | 131100000 | 131150000 | 3.18 | 2.54 | 0.539 | 0.947 | 0.13 | 0.110762 |
| 6_75725000 | 6 | 75700000 | 75750000 | 5.05 | 2.49 | 0.539 | 1 | -0.39 | 0.11069 |
| 6_59155000 | 6 | 59130000 | 59180000 | 4.11 | 1.95 | 0.278 | 1 | -0.22 | 0.110548 |
| 8_45825000 | 8 | 45800000 | 45850000 | 4 | 2.38 | 0.278 | 1 | -0.39 | 0.110537 |
| 8_83325000 | 8 | 83300000 | 83350000 | 2.2 | 1.95 | 1 | 1 | 0.39 | 0.110526 |
| 11_121255000 | 11 | 121230000 | 121280000 | 3.92 | 1.95 | 0.539 | 1 | -0.37 | 0.110448 |
| 6_74705000 | 6 | 74680000 | 74730000 | 2.51 | 1.78 | 0.278 | 1 | -0.21 | 0.110415 |
| 5_114285000 | 5 | 114260000 | 114310000 | 2.31 | 1.84 | 1 | 1 | -0.15 | 0.110113 |
| 6_77715000 | 6 | 77690000 | 77740000 | 2.75 | 1.95 | 0.539 | 1 | -0.29 | 0.110065 |
| 1_115635000 | 1 | 115610000 | 115660000 | 2.55 | 3.03 | 0.539 | 1 | -0.37 | 0.110034 |
| 10_98915000 | 10 | 98890000 | 98940000 | 4.25 | 2.84 | 0.551 | 1 | -0.22 | 0.109967 |
| 6_59535000 | 6 | 59510000 | 59560000 | 3.11 | 2.69 | 0.539 | 0.723 | -0.17 | 0.109958 |
| 6_128845000 | 6 | 128820000 | 128870000 | 2.65 | 1.95 | 0.539 | 1 | -0.33 | 0.109834 |
| 8_77915000 | 8 | 77890000 | 77940000 | 3.76 | 3.13 | 1 | 1 | -0.1 | 0.109746 |
| 6_83315000 | 6 | 83290000 | 83340000 | 3.8 | 3.8 | 0.539 | 1 | -0.2 | 0.10963 |
| 4_128265000 | 4 | 128240000 | 128290000 | 3.2 | 2.57 | 0.539 | 0.539 | -0.49 | 0.109586 |
| 6_70865000 | 6 | 70840000 | 70890000 | 3.31 | 2.33 | 0.516 | 1 | -0.42 | 0.109506 |
| 2_7305000 | 2 | 7280000 | 7330000 | 3.24 | 1.95 | 0.539 | 1 | -0.01 | 0.109505 |
| 5_32795000 | 5 | 32770000 | 32820000 | 2.87 | 2.57 | 0.131 | 1 | -0.12 | 0.109475 |
| 5_112445000 | 5 | 112420000 | 112470000 | 2.53 | 2.78 | 1 | 1 | -0.13 | 0.109456 |
| 11_123085000 | 11 | 123060000 | 123110000 | 1.97 | 2.72 | 0.539 | 0.677 | -0.14 | 0.109315 |
| 5_109865000 | 5 | 109840000 | 109890000 | 1.91 | 2.22 | 1 | 1 | -0.43 | 0.10929 |
| 6_75345000 | 6 | 75320000 | 75370000 | 3.44 | 3 | 0.278 | 1 | -0.34 | 0.109277 |
| 6_79355000 | 6 | 79330000 | 79380000 | 3.38 | 1.99 | 0.516 | 1 | 0.32 | 0.109066 |
| 6_72205000 | 6 | 72180000 | 72230000 | 3.24 | 2.87 | 1 | 1 | 0.34 | 0.108974 |
| 6_76695000 | 6 | 76670000 | 76720000 | 4.39 | 2.21 | 0.539 | 1 | -0.3 | 0.108595 |
| 6_59165000 | 6 | 59140000 | 59190000 | 4.11 | 1.95 | 0.278 | 1 | 0.34 | 0.108437 |
| 6_115665000 | 6 | 115640000 | 115690000 | 2.35 | 3.17 | 0.539 | 1 | -0.25 | 0.108427 |
| 5_101745000 | 5 | 101720000 | 101770000 | 2.62 | 4.76 | 0.516 | 1 | 0.15 | 0.108393 |
| 5_65445000 | 5 | 65420000 | 65470000 | 1.32 | 1.12 | 1 | 1 | -0.2 | 0.108272 |
| 6_68345000 | 6 | 68320000 | 68370000 | 3.24 | 1.8 | 0.131 | 1 | -0.25 | 0.10821 |
| 7_70375000 | 7 | 70350000 | 70400000 | 2.37 | 1.93 | 1 | 1 | 0.44 | 0.108165 |
| 5_134545000 | 5 | 134520000 | 134570000 | 4.04 | 3.46 | 0.278 | 0.278 | 0.01 | 0.108107 |
| 6_58755000 | 6 | 58730000 | 58780000 | 3.6 | 2.87 | 1 | 1 | 0.32 | 0.108047 |
| 10_71115000 | 10 | 71090000 | 71140000 | 3.58 | 4.17 | 1 | 1 | -0.09 | 0.108033 |
| 6_69325000 | 6 | 69300000 | 69350000 | 5.25 | 4.54 | 0.122 | 0.631 | -0.27 | 0.10793 |
| 6_71065000 | 6 | 71040000 | 71090000 | 3.02 | 3.26 | 0.516 | 1 | -0.12 | 0.107764 |
| 6_76035000 | 6 | 76010000 | 76060000 | 3.04 | 2.51 | 0.131 | 1 | -0.5 | 0.107675 |
| 6_75485000 | 6 | 75460000 | 75510000 | 4 | 2.84 | 0.539 | 1 | 0.46 | 0.107446 |
| 6_78065000 | 6 | 78040000 | 78090000 | 3.04 | 1.89 | 1 | 1 | -0.3 | 0.107225 |
| 5_119495000 | 5 | 119470000 | 119520000 | 5.05 | 5.05 | 0.539 | 1 | -0.09 | 0.107216 |
| 1_188365000 | 1 | 188340000 | 188390000 | 4.16 | 2.46 | 1 | 1 | -0.48 | 0.107195 |
| 5_117845000 | 5 | 117820000 | 117870000 | 2.95 | 2.37 | 0.539 | 1 | -0.26 | 0.107169 |
| 6_77965000 | 6 | 77940000 | 77990000 | 3.5 | 2.38 | 0.954 | 1 | -0.21 | 0.107143 |
| 6_70275000 | 6 | 70250000 | 70300000 | 3.92 | 2.3 | 0.131 | 1 | -0.5 | 0.107052 |
| 6_80425000 | 6 | 80400000 | 80450000 | 2.92 | 3.31 | 0.131 | 1 | -0.44 | 0.107033 |
| 5_54325000 | 5 | 54300000 | 54350000 | 3.72 | 2.61 | 0.539 | 1 | -0.29 | 0.107007 |
| 1_116005000 | 1 | 115980000 | 116030000 | 1.43 | 1.49 | 0.77 | 1 | -0.46 | 0.10698 |
| 6_74515000 | 6 | 74490000 | 74540000 | 3.47 | 2.72 | 0.539 | 1 | 0.47 | 0.106965 |
| 6_59835000 | 6 | 59810000 | 59860000 | 4.36 | 2.59 | 0.539 | 1 | -0.43 | 0.106663 |
| 6_58745000 | 6 | 58720000 | 58770000 | 3.6 | 2.87 | 1 | 1 | -0.13 | 0.106651 |
| 6_131105000 | 6 | 131080000 | 131130000 | 3.03 | 2.54 | 0.677 | 0.947 | -0.39 | 0.106516 |
| 6_72315000 | 6 | 72290000 | 72340000 | 4.22 | 2.15 | 0.278 | 1 | -0.48 | 0.106513 |
| 5_44735000 | 5 | 44710000 | 44760000 | 2.92 | 2.09 | 1 | 1 | -0.49 | 0.106379 |
| 1_115995000 | 1 | 115970000 | 116020000 | 1.43 | 1.49 | 0.77 | 1 | -0.47 | 0.106219 |
| 1_115275000 | 1 | 115250000 | 115300000 | 3.11 | 2.87 | 1 | 1 | -0.39 | 0.106165 |
| 5_35085000 | 5 | 35060000 | 35110000 | 5.44 | 2.93 | 0.131 | 1 | -0.05 | 0.106144 |
| 6_69765000 | 6 | 69740000 | 69790000 | 3.56 | 2.03 | 0.242 | 1.513 | -0.1 | 0.106136 |
| 14_39605000 | 14 | 39580000 | 39630000 | 2.22 | 3.95 | 1 | 0.297 | -0.32 | 0.106063 |
| 8_84595000 | 8 | 84570000 | 84620000 | 2.61 | 2.61 | 0.539 | 1 | -0.35 | 0.106039 |
| 5_94305000 | 5 | 94280000 | 94330000 | 1.57 | 1.94 | 0.516 | 0.516 | -0.3 | 0.106013 |
| 6_76735000 | 6 | 76710000 | 76760000 | 3.13 | 2.23 | 0.539 | 1 | -0.35 | 0.105975 |
| 9_65315000 | 9 | 65290000 | 65340000 | 5.87 | 3.17 | 0.539 | 1 | -0.07 | 0.105973 |
| 6_117095000 | 6 | 117070000 | 117120000 | 3.19 | 2.38 | 0.131 | 1 | 0 | 0.105833 |
| 14_17855000 | 14 | 17830000 | 17880000 | 2.97 | 2.48 | 0.731 | 1 | -0.13 | 0.105825 |
| 5_117735000 | 5 | 117710000 | 117760000 | 2.13 | 2.95 | 1 | 1 | -0.29 | 0.105709 |
| 6_74805000 | 6 | 74780000 | 74830000 | 4.63 | 3.42 | 0.278 | 1 | 0.44 | 0.105709 |
| 6_78795000 | 6 | 78770000 | 78820000 | 4 | 1.89 | 1 | 1 | -0.11 | 0.105664 |
| 2_7095000 | 2 | 7070000 | 7120000 | 3.24 | 4.82 | 0.539 | 1 | 0 | 0.105651 |
| 6_58125000 | 6 | 58100000 | 58150000 | 5.8 | 7.46 | 0.278 | 1 | 0.41 | 0.105639 |
| 5_34775000 | 5 | 34750000 | 34800000 | 4.07 | 2.59 | 0.539 | 1 | -0.02 | 0.105634 |
| 2_8125000 | 2 | 8100000 | 8150000 | 3.28 | 3.21 | 1 | 1 | -0.4 | 0.105379 |
| 8_51605000 | 8 | 51580000 | 51630000 | 2.33 | 1.74 | 0.862 | 1 | 0.47 | 0.105266 |
| 6_119645000 | 6 | 119620000 | 119670000 | 1.85 | 2.84 | 0.596 | 0.596 | -0.08 | 0.105196 |
| 2_7615000 | 2 | 7590000 | 7640000 | 3.13 | 3.49 | 0.297 | 1 | 0.21 | 0.104841 |
| 6_57405000 | 6 | 57380000 | 57430000 | 2.17 | 2.06 | 0.278 | 1 | -0.38 | 0.104821 |
| 10_101665000 | 10 | 101640000 | 101690000 | 3.53 | 3.23 | 1 | 1 | -0.11 | 0.104565 |
| 8_39435000 | 8 | 39410000 | 39460000 | 2.4 | 3.32 | 1 | 1 | 0.36 | 0.104558 |
| 8_83695000 | 8 | 83670000 | 83720000 | 2.46 | 3.36 | 0.91 | 0.91 | 0.47 | 0.104354 |
| 6_68985000 | 6 | 68960000 | 69010000 | 7.21 | 2.84 | 0.278 | 1 | 0.36 | 0.104237 |
| 8_44725000 | 8 | 44700000 | 44750000 | 2.45 | 2.75 | 1 | 0.596 | -0.3 | 0.104188 |
| 6_60715000 | 6 | 60690000 | 60740000 | 3.98 | 2.3 | 0.551 | 1 | 0.28 | 0.10417 |
| 4_141735000 | 4 | 141710000 | 141760000 | 2.17 | 3.39 | 0.723 | 1 | -0.09 | 0.104111 |
| 9_10605000 | 9 | 10580000 | 10630000 | 2.92 | 1.61 | 1 | 1 | -0.21 | 0.103965 |
| 4_103895000 | 4 | 103870000 | 103920000 | 2.11 | 2.67 | 0.539 | 1 | -0.38 | 0.103912 |
| 8_83365000 | 8 | 83340000 | 83390000 | 1.94 | 3.75 | 1 | 1 | -0.41 | 0.103874 |
| 2_7045000 | 2 | 7020000 | 7070000 | 3.33 | 6.44 | 0.539 | 1 | -0.06 | 0.103836 |
| 14_43305000 | 14 | 43280000 | 43330000 | 1.18 | 2.38 | 1 | 1 | -0.29 | 0.103832 |
| 6_78185000 | 6 | 78160000 | 78210000 | 4.73 | 4.32 | 0.954 | 0.954 | -0.29 | 0.103732 |
| 2_6645000 | 2 | 6620000 | 6670000 | 3.68 | 1.74 | 0.278 | 1 | -0.4 | 0.103585 |
| 2_7905000 | 2 | 7880000 | 7930000 | 3.42 | 2.61 | 1 | 0.551 | 0.31 | 0.103554 |
| 6_72765000 | 6 | 72740000 | 72790000 | 2.88 | 1.96 | 1 | 1 | -0.32 | 0.103528 |
| 6_59865000 | 6 | 59840000 | 59890000 | 3.06 | 2.4 | 0.539 | 1 | -0.43 | 0.103306 |
| 6_82625000 | 6 | 82600000 | 82650000 | 2.7 | 1.8 | 0.539 | 1 | -0.09 | 0.103243 |
| 6_75785000 | 6 | 75760000 | 75810000 | 3.25 | 1.53 | 0.783 | 1 | -0.45 | 0.103209 |
| 2_7915000 | 2 | 7890000 | 7940000 | 3.42 | 2.61 | 1 | 0.731 | 0.16 | 0.103115 |
| 6_79115000 | 6 | 79090000 | 79140000 | 3.11 | 2.49 | 0.516 | 1 | 0.5 | 0.103081 |
| 15_38135000 | 15 | 38110000 | 38160000 | 1.91 | 2.88 | 1 | 1 | -0.11 | 0.102774 |
| 5_114365000 | 5 | 114340000 | 114390000 | 2.6 | 3.43 | 0.71 | 1 | -0.36 | 0.102203 |
| 6_59215000 | 6 | 59190000 | 59240000 | 3.75 | 1.95 | 0.539 | 1 | -0.05 | 0.102174 |
| 5_109885000 | 5 | 109860000 | 109910000 | 1.91 | 2.22 | 1 | 1 | -0.37 | 0.102117 |
| 2_8305000 | 2 | 8280000 | 8330000 | 2.21 | 2.13 | 0.551 | 1 | 0.38 | 0.10207 |
| 8_83305000 | 8 | 83280000 | 83330000 | 2.2 | 1.95 | 1 | 1 | 0 | 0.102052 |
| 2_6135000 | 2 | 6110000 | 6160000 | 2.35 | 2.7 | 0.539 | 1 | -0.12 | 0.101955 |
| 13_7885000 | 13 | 7860000 | 7910000 | 2.07 | 2.85 | 0.954 | 0.77 | 0.38 | 0.10184 |
| 5_121105000 | 5 | 121080000 | 121130000 | 3.15 | 3.08 | 0.539 | 1 | 0.37 | 0.101796 |
| 5_54265000 | 5 | 54240000 | 54290000 | 2.7 | 1.74 | 0.908 | 1.684 | 0.29 | 0.101779 |
| 6_74305000 | 6 | 74280000 | 74330000 | 3.1 | 2.26 | 0.131 | 1 | -0.45 | 0.101628 |
| 6_73415000 | 6 | 73390000 | 73440000 | 2.38 | 1.53 | 0.723 | 0.585 | -0.24 | 0.10155 |
| 6_65505000 | 6 | 65480000 | 65530000 | 2.37 | 4.4 | 1 | 1 | 0.28 | 0.101417 |
| 6_128885000 | 6 | 128860000 | 128910000 | 3.39 | 2.09 | 0.539 | 1 | -0.35 | 0.101395 |
| 1_118545000 | 1 | 118520000 | 118570000 | 2.45 | 2.16 | 0.908 | 1 | -0.36 | 0.101324 |
| 5_61865000 | 5 | 61840000 | 61890000 | 3.46 | 2.69 | 0.516 | 1 | 0.32 | 0.101225 |
| 5_117465000 | 5 | 117440000 | 117490000 | 2.68 | 2.55 | 0.903 | 1 | -0.47 | 0.101185 |
| 6_58895000 | 6 | 58870000 | 58920000 | 4.2 | 4.42 | 1 | 1 | 0.34 | 0.101116 |
| 5_32445000 | 5 | 32420000 | 32470000 | 2.59 | 2.08 | 0.278 | 1 | 0.5 | 0.101076 |
| 5_114435000 | 5 | 114410000 | 114460000 | 3.46 | 3.51 | 0.516 | 1 | -0.36 | 0.101023 |
| 5_54955000 | 5 | 54930000 | 54980000 | 3.66 | 1.95 | 0.585 | 1 | 0.45 | 0.100917 |
| 6_62465000 | 6 | 62440000 | 62490000 | 3.56 | 3.56 | 0.278 | 1 | -0.25 | 0.100561 |
| 1_126325000 | 1 | 126300000 | 126350000 | 3.26 | 3.66 | 1 | 1 | -0.31 | 0.100441 |
| 6_74505000 | 6 | 74480000 | 74530000 | 3.49 | 2.18 | 0.539 | 1 | 0.47 | 0.100421 |
| 1_168695000 | 1 | 168670000 | 168720000 | 5.03 | 5.03 | 1 | 0.516 | -0.41 | 0.100114 |
| 6_62675000 | 6 | 62650000 | 62700000 | 2.19 | 2.23 | 0.631 | 1 | -0.3 | 0.100063 |
| 2_7895000 | 2 | 7870000 | 7920000 | 3.42 | 2.61 | 1 | 0.551 | -0.01 | 0.100033 |
| 8_35675000 | 8 | 35650000 | 35700000 | 2.12 | 2.84 | 0.631 | 1 | -0.05 | 0.100023 |
| 2_6795000 | 2 | 6770000 | 6820000 | 4.23 | 3.07 | 1 | 1 | 0.25 | 0.099963 |
| 2_129575000 | 2 | 129550000 | 129600000 | 4.04 | 3.75 | 1 | 1 | -0.36 | 0.099918 |
| 5_115105000 | 5 | 115080000 | 115130000 | 2.69 | 3.43 | 0.677 | 0.539 | -0.03 | 0.099835 |
| 2_9125000 | 2 | 9100000 | 9150000 | 2.91 | 3.71 | 0.596 | 0.731 | -0.16 | 0.099808 |
| 6_81105000 | 6 | 81080000 | 81130000 | 2.7 | 2.3 | 1 | 1 | -0.16 | 0.099805 |
| 6_78005000 | 6 | 77980000 | 78030000 | 3.5 | 2.84 | 1 | 1 | -0.24 | 0.099797 |
| 14_49435000 | 14 | 49410000 | 49460000 | 2.39 | 2.39 | 1 | 1 | 0.06 | 0.099792 |
| 8_26395000 | 8 | 26370000 | 26420000 | 1.78 | 3.27 | 1 | 1 | -0.19 | 0.099533 |
| 8_85245000 | 8 | 85220000 | 85270000 | 2.59 | 1.81 | 0.551 | 0.955 | -0.24 | 0.099528 |
| 1_59165000 | 1 | 59140000 | 59190000 | 2.7 | 2.21 | 0.631 | 1 | -0.25 | 0.099446 |
| 5_119115000 | 5 | 119090000 | 119140000 | 2.02 | 2.4 | 1 | 1 | -0.37 | 0.099217 |
| 5_55125000 | 5 | 55100000 | 55150000 | 1.69 | 2.06 | 0.278 | 1 | -0.5 | 0.09901 |
| 6_62645000 | 6 | 62620000 | 62670000 | 2.47 | 3.24 | 0.585 | 1 | -0.27 | 0.09892 |
| 6_77895000 | 6 | 77870000 | 77920000 | 3.71 | 3.17 | 0.539 | 1 | 0.12 | 0.098914 |
| 5_117865000 | 5 | 117840000 | 117890000 | 2.53 | 2.37 | 0.539 | 1 | -0.46 | 0.098897 |
| 1_114815000 | 1 | 114790000 | 114840000 | 3.87 | 2.76 | 0.585 | 1 | 0.3 | 0.098803 |
| 5_59685000 | 5 | 59660000 | 59710000 | 1.96 | 2.23 | 0.516 | 1 | 0.3 | 0.098778 |
| 6_69775000 | 6 | 69750000 | 69800000 | 3.76 | 2.03 | 0.088 | 1.513 | -0.06 | 0.098643 |
| 6_76045000 | 6 | 76020000 | 76070000 | 3.04 | 2.51 | 0.131 | 1 | -0.49 | 0.098618 |
| 5_117255000 | 5 | 117230000 | 117280000 | 3.09 | 2.99 | 0.539 | 0.539 | -0.28 | 0.098535 |
| 5_61835000 | 5 | 61810000 | 61860000 | 3.46 | 2.57 | 0.516 | 1 | 0.26 | 0.098479 |
| 6_65515000 | 6 | 65490000 | 65540000 | 2.37 | 4.4 | 0.723 | 1 | 0.29 | 0.098362 |
| 6_79545000 | 6 | 79520000 | 79570000 | 5.02 | 2.57 | 0.278 | 1 | -0.29 | 0.09831 |
| 5_34495000 | 5 | 34470000 | 34520000 | 3.04 | 3.16 | 0.278 | 1 | 0.35 | 0.098305 |
| 2_8385000 | 2 | 8360000 | 8410000 | 3.09 | 2.39 | 0.551 | 1 | -0.33 | 0.098293 |
| 1_122955000 | 1 | 122930000 | 122980000 | 3.2 | 3.27 | 1 | 1 | -0.31 | 0.098281 |
| 6_74615000 | 6 | 74590000 | 74640000 | 3.04 | 1.82 | 0.33 | 1 | -0.28 | 0.098271 |
| 15_71055000 | 15 | 71030000 | 71080000 | 2.31 | 3.08 | 0.516 | 1 | -0.49 | 0.098253 |
| 8_24785000 | 8 | 24760000 | 24810000 | 2.95 | 2.95 | 0.539 | 1 | -0.02 | 0.098198 |
| 6_68065000 | 6 | 68040000 | 68090000 | 4.17 | 1.82 | 0.539 | 1 | 0.23 | 0.097989 |
| 5_54945000 | 5 | 54920000 | 54970000 | 3.66 | 1.95 | 1 | 1 | 0.46 | 0.097956 |
| 5_109855000 | 5 | 109830000 | 109880000 | 1.91 | 2.3 | 1 | 1 | -0.5 | 0.097868 |
| 8_39545000 | 8 | 39520000 | 39570000 | 2.35 | 3.29 | 0.816 | 1 | -0.11 | 0.097756 |
| 11_54325000 | 11 | 54300000 | 54350000 | 1.91 | 1.69 | 1 | 1 | -0.39 | 0.097745 |
| 5_46115000 | 5 | 46090000 | 46140000 | 3.27 | 2.85 | 1 | 1 | 0.35 | 0.097698 |
| 6_131135000 | 6 | 131110000 | 131160000 | 3.18 | 2.54 | 0.539 | 0.947 | 0.19 | 0.09761 |
| 8_21995000 | 8 | 21970000 | 22020000 | 4.58 | 2.87 | 0.278 | 1 | 0.24 | 0.097567 |
| 8_26385000 | 8 | 26360000 | 26410000 | 1.91 | 3.27 | 1 | 1 | -0.17 | 0.097552 |
| 5_117715000 | 5 | 117690000 | 117740000 | 2.13 | 2.52 | 0.516 | 1 | -0.36 | 0.09755 |
| 14_16485000 | 14 | 16460000 | 16510000 | 2.68 | 2.68 | 1 | 1 | -0.19 | 0.097468 |
| 6_64535000 | 6 | 64510000 | 64560000 | 2.5 | 2.07 | 0.516 | 1 | -0.2 | 0.097411 |
| 5_33765000 | 5 | 33740000 | 33790000 | 1.78 | 2.38 | 0.088 | 1 | -0.5 | 0.097408 |
| 1_120325000 | 1 | 120300000 | 120350000 | 1.88 | 5.36 | 1 | 1 | -0.12 | 0.0974 |
| 8_35295000 | 8 | 35270000 | 35320000 | 2.23 | 4.31 | 1 | 1 | -0.46 | 0.097386 |
| 6_75365000 | 6 | 75340000 | 75390000 | 3.44 | 2.66 | 0.278 | 1 | -0.39 | 0.097265 |
| 12_50435000 | 12 | 50410000 | 50460000 | 2.24 | 2.23 | 1 | 0.516 | -0.15 | 0.097237 |
| 6_66275000 | 6 | 66250000 | 66300000 | 3.62 | 3.42 | 0.539 | 1 | -0.26 | 0.097083 |
| 11_77345000 | 11 | 77320000 | 77370000 | 3.08 | 2.61 | 1 | 1 | -0.46 | 0.097063 |
| 6_72755000 | 6 | 72730000 | 72780000 | 2.88 | 2.19 | 1 | 1 | -0.35 | 0.09705 |
| 6_77555000 | 6 | 77530000 | 77580000 | 3.99 | 1.84 | 1 | 1 | -0.11 | 0.096942 |
| 8_44735000 | 8 | 44710000 | 44760000 | 2.45 | 2.75 | 1 | 0.596 | -0.29 | 0.09691 |
| 6_83325000 | 6 | 83300000 | 83350000 | 3.8 | 3.8 | 0.539 | 1 | -0.21 | 0.096876 |
| 6_115055000 | 6 | 115030000 | 115080000 | 1.86 | 2.64 | 1 | 1 | -0.22 | 0.096764 |
| 17_12945000 | 17 | 12920000 | 12970000 | 3.03 | 3.4 | 0.539 | 1 | 0.49 | 0.0967 |
| 14_17845000 | 14 | 17820000 | 17870000 | 2.97 | 2 | 1 | 1 | -0.1 | 0.096504 |
| 6_57425000 | 6 | 57400000 | 57450000 | 2.31 | 2.58 | 0.278 | 1 | -0.37 | 0.0963 |
| 9_61085000 | 9 | 61060000 | 61110000 | 2.08 | 3.15 | 1 | 1 | -0.42 | 0.096298 |
| 14_41855000 | 14 | 41830000 | 41880000 | 1.61 | 2.34 | 1 | 1 | -0.09 | 0.096232 |
| 6_78785000 | 6 | 78760000 | 78810000 | 4 | 1.89 | 1 | 1 | -0.07 | 0.096226 |
| 9_118855000 | 9 | 118830000 | 118880000 | 2.04 | 3.23 | 0.677 | 1 | -0.35 | 0.096066 |
| 6_70365000 | 6 | 70340000 | 70390000 | 2.14 | 1.96 | 0.539 | 1 | 0.18 | 0.09588 |
| 8_84645000 | 8 | 84620000 | 84670000 | 3.13 | 3.13 | 0.908 | 1 | 0.49 | 0.095835 |
| 11_120495000 | 11 | 120470000 | 120520000 | 2.97 | 3.38 | 0.862 | 1 | 0.25 | 0.095694 |
| 14_17835000 | 14 | 17810000 | 17860000 | 2.97 | 2 | 1 | 1 | -0.1 | 0.095694 |
| 5_38195000 | 5 | 38170000 | 38220000 | 3.51 | 2.38 | 0.539 | 1 | 0.17 | 0.095666 |
| 6_77115000 | 6 | 77090000 | 77140000 | 2.58 | 3.92 | 0.278 | 1 | -0.4 | 0.095653 |
| 9_9885000 | 9 | 9860000 | 9910000 | 3.89 | 2.64 | 1 | 1 | 0.46 | 0.09558 |
| 5_65175000 | 5 | 65150000 | 65200000 | 2.43 | 3.38 | 0.516 | 1 | 0.48 | 0.09555 |
| 5_61815000 | 5 | 61790000 | 61840000 | 2.37 | 2.55 | 0.516 | 1 | -0.44 | 0.095448 |
| 2_8435000 | 2 | 8410000 | 8460000 | 2.77 | 2.61 | 0.776 | 1 | -0.45 | 0.095413 |
| 14_39595000 | 14 | 39570000 | 39620000 | 2.22 | 3.95 | 0.641 | 0.297 | -0.4 | 0.095266 |
| 5_32745000 | 5 | 32720000 | 32770000 | 2.87 | 1.98 | 0.047 | 1 | -0.15 | 0.095245 |
| 5_117885000 | 5 | 117860000 | 117910000 | 2.06 | 1.69 | 0.539 | 1 | -0.47 | 0.095204 |
| 6_78075000 | 6 | 78050000 | 78100000 | 3.4 | 1.89 | 1 | 1 | -0.28 | 0.09518 |
| 9_65385000 | 9 | 65360000 | 65410000 | 4.43 | 2.46 | 0.539 | 1 | 0.41 | 0.095143 |
| 9_128395000 | 9 | 128370000 | 128420000 | 2.5 | 2.43 | 0.686 | 1 | 0.01 | 0.095066 |
| 6_74825000 | 6 | 74800000 | 74850000 | 4.63 | 3.42 | 0.278 | 1 | 0.47 | 0.094822 |
| 14_43295000 | 14 | 43270000 | 43320000 | 1.38 | 2.38 | 1 | 1 | -0.29 | 0.094726 |
| 4_102605000 | 4 | 102580000 | 102630000 | 2.88 | 3.03 | 1 | 0.908 | 0.27 | 0.094624 |
| 6_65035000 | 6 | 65010000 | 65060000 | 2.94 | 2.94 | 0.278 | 1 | 0.26 | 0.094435 |
| 5_124335000 | 5 | 124310000 | 124360000 | 1.78 | 1.22 | 1 | 1 | -0.33 | 0.094383 |
| 8_46005000 | 8 | 45980000 | 46030000 | 1.42 | 1.95 | 0.539 | 0.723 | -0.32 | 0.094368 |
| 11_133875000 | 11 | 133850000 | 133900000 | 2.26 | 2.87 | 1 | 1 | -0.42 | 0.094336 |
| 8_86885000 | 8 | 86860000 | 86910000 | 2.09 | 2.1 | 1 | 1 | -0.05 | 0.094329 |
| 5_50825000 | 5 | 50800000 | 50850000 | 2.92 | 2.35 | 0.539 | 1 | -0.48 | 0.094281 |
| 2_118285000 | 2 | 118260000 | 118310000 | 2.35 | 2.82 | 0.423 | 1 | -0.22 | 0.094208 |
| 4_103925000 | 4 | 103900000 | 103950000 | 2.38 | 2.67 | 0.539 | 1 | -0.38 | 0.094185 |
| 4_15345000 | 4 | 15320000 | 15370000 | 5.09 | 3.31 | 0.297 | 0.641 | 0.38 | 0.09416 |
| 10_101635000 | 10 | 101610000 | 101660000 | 3.32 | 2.58 | 1 | 1 | 0 | 0.094129 |
| 5_110645000 | 5 | 110620000 | 110670000 | 5.41 | 4.29 | 1 | 1 | 0.5 | 0.094124 |
| 5_124135000 | 5 | 124110000 | 124160000 | 1.79 | 1.44 | 1 | 1 | -0.34 | 0.094082 |
| 8_83295000 | 8 | 83270000 | 83320000 | 2.51 | 1.95 | 1 | 1 | -0.03 | 0.094069 |
| 1_122965000 | 1 | 122940000 | 122990000 | 3.2 | 3.27 | 1 | 1 | 0.02 | 0.093881 |
| 8_25415000 | 8 | 25390000 | 25440000 | 2.56 | 2.75 | 1 | 0.862 | -0.42 | 0.093854 |
| 9_65405000 | 9 | 65380000 | 65430000 | 4.43 | 2.46 | 0.539 | 1 | 0.26 | 0.093815 |
| 6_78195000 | 6 | 78170000 | 78220000 | 4.05 | 4.32 | 0.954 | 0.954 | -0.3 | 0.093787 |
| 6_67295000 | 6 | 67270000 | 67320000 | 3.52 | 2.56 | 0.088 | 1 | 0.5 | 0.093771 |
| 1_82775000 | 1 | 82750000 | 82800000 | 2.5 | 2.84 | 1 | 1 | -0.39 | 0.093694 |
| 5_14585000 | 5 | 14560000 | 14610000 | 1.93 | 2.66 | 0.278 | 1 | -0.15 | 0.093686 |
| 5_157465000 | 5 | 157440000 | 157490000 | 1.69 | 1.33 | 0.539 | 1 | -0.18 | 0.093571 |
| 6_70665000 | 6 | 70640000 | 70690000 | 2.28 | 3.29 | 0.539 | 1 | -0.3 | 0.093469 |
| 1_122935000 | 1 | 122910000 | 122960000 | 3.16 | 3.27 | 0.865 | 1 | -0.35 | 0.093415 |
| 5_55105000 | 5 | 55080000 | 55130000 | 1.51 | 2.06 | 0.783 | 1 | -0.3 | 0.09336 |
| 8_51615000 | 8 | 51590000 | 51640000 | 4.95 | 1.74 | 0.539 | 1 | 0.48 | 0.09336 |
| 5_138175000 | 5 | 138150000 | 138200000 | 2.38 | 1.62 | 1 | 1 | 0.39 | 0.093323 |
| 6_138925000 | 6 | 138900000 | 138950000 | 2.26 | 3.78 | 0.539 | 0.539 | -0.45 | 0.093301 |
| 5_66005000 | 5 | 65980000 | 66030000 | 2.28 | 3.25 | 1 | 1 | -0.06 | 0.093264 |
| 6_96775000 | 6 | 96750000 | 96800000 | 3.25 | 2.84 | 0.539 | 1 | -0.26 | 0.093235 |
| 6_77285000 | 6 | 77260000 | 77310000 | 4.2 | 3.35 | 0.539 | 1 | 0.42 | 0.093226 |
| 6_77305000 | 6 | 77280000 | 77330000 | 4.2 | 3.35 | 0.539 | 1 | -0.08 | 0.093132 |
| 10_32765000 | 10 | 32740000 | 32790000 | 2.55 | 3.75 | 1 | 1 | -0.3 | 0.093076 |
| 6_59375000 | 6 | 59350000 | 59400000 | 3.47 | 1.97 | 0.658 | 1 | -0.25 | 0.093059 |
| 1_70555000 | 1 | 70530000 | 70580000 | 2.93 | 1.96 | 1 | 1 | -0.12 | 0.093021 |
| 8_35445000 | 8 | 35420000 | 35470000 | 3.57 | 2.79 | 0.539 | 1 | -0.08 | 0.093007 |
| 6_129115000 | 6 | 129090000 | 129140000 | 2.16 | 1.85 | 1 | 1 | 0.44 | 0.092977 |
| 5_36135000 | 5 | 36110000 | 36160000 | 2.51 | 1.76 | 1 | 1 | 0.29 | 0.092946 |
| 5_111255000 | 5 | 111230000 | 111280000 | 2.3 | 1.78 | 0.539 | 1 | -0.24 | 0.092938 |
| 14_17825000 | 14 | 17800000 | 17850000 | 2.97 | 2 | 1 | 1 | -0.11 | 0.092882 |
| 17_23395000 | 17 | 23370000 | 23420000 | 3.23 | 2.89 | 1 | 1 | -0.03 | 0.092826 |
| 5_62895000 | 5 | 62870000 | 62920000 | 1.87 | 2.47 | 1 | 1 | 0.35 | 0.092821 |
| 5_55925000 | 5 | 55900000 | 55950000 | 1.52 | 1.69 | 0.516 | 1 | -0.21 | 0.092793 |
| 1_115425000 | 1 | 115400000 | 115450000 | 4.4 | 5.2 | 1 | 1 | 0.13 | 0.092749 |
| 6_130955000 | 6 | 130930000 | 130980000 | 3.05 | 1.95 | 0.908 | 1 | -0.31 | 0.092661 |
| 11_134595000 | 11 | 134570000 | 134620000 | 2.41 | 2.22 | 0.539 | 1 | -0.21 | 0.092643 |
| 5_121145000 | 5 | 121120000 | 121170000 | 3.15 | 2.5 | 0.539 | 0.77 | 0.14 | 0.092528 |
| 6_109475000 | 6 | 109450000 | 109500000 | 1.7 | 2.23 | 1 | 1 | 0.46 | 0.092507 |
| 6_75715000 | 6 | 75690000 | 75740000 | 5.05 | 2.49 | 0.539 | 1 | -0.39 | 0.092493 |
| 6_71115000 | 6 | 71090000 | 71140000 | 3.38 | 3.76 | 0.516 | 1 | 0.3 | 0.092412 |
| 6_64965000 | 6 | 64940000 | 64990000 | 4.63 | 3.69 | 0.278 | 1 | -0.16 | 0.092212 |
| 6_75985000 | 6 | 75960000 | 76010000 | 1.86 | 1.38 | 0.539 | 1 | -0.49 | 0.092212 |
| 5_10695000 | 5 | 10670000 | 10720000 | 2.22 | 2.74 | 1 | 1 | -0.38 | 0.092202 |
| 5_63015000 | 5 | 62990000 | 63040000 | 4.48 | 1.89 | 0.539 | 1 | -0.34 | 0.092193 |
| 11_120515000 | 11 | 120490000 | 120540000 | 2.64 | 3.38 | 0.539 | 1 | -0.33 | 0.092116 |
| 6_105515000 | 6 | 105490000 | 105540000 | 2.63 | 2.81 | 1 | 1 | -0.36 | 0.092115 |
| 8_89155000 | 8 | 89130000 | 89180000 | 2.38 | 3.49 | 0.539 | 1 | -0.29 | 0.092055 |
| 7_108985000 | 7 | 108960000 | 109010000 | 1.72 | 2.33 | 0.35 | 0.539 | -0.42 | 0.092028 |
| 5_34695000 | 5 | 34670000 | 34720000 | 3.99 | 3.14 | 0.539 | 1 | 0.19 | 0.092014 |
| 15_70075000 | 15 | 70050000 | 70100000 | 3.8 | 2.35 | 0.539 | 1 | 0.3 | 0.092009 |
| 5_50915000 | 5 | 50890000 | 50940000 | 3.2 | 3.38 | 0.131 | 1 | 0.5 | 0.092006 |
| 6_77365000 | 6 | 77340000 | 77390000 | 3.28 | 2.12 | 0.539 | 1 | -0.33 | 0.091945 |
| 4_103885000 | 4 | 103860000 | 103910000 | 2.07 | 1.95 | 0.539 | 1 | -0.37 | 0.091924 |
| 8_25435000 | 8 | 25410000 | 25460000 | 2.56 | 2.75 | 1 | 0.862 | 0.39 | 0.091861 |
| 5_124115000 | 5 | 124090000 | 124140000 | 1.71 | 1.19 | 1 | 1 | -0.38 | 0.09181 |
| 6_74975000 | 6 | 74950000 | 7.50E+07 | 5 | 3.43 | 1 | 1 | -0.46 | 0.091806 |
| 6_70685000 | 6 | 70660000 | 70710000 | 2.7 | 3.66 | 0.539 | 1 | -0.14 | 0.091642 |
| 11_134125000 | 11 | 134100000 | 134150000 | 3.04 | 1.94 | 1 | 1 | -0.28 | 0.091569 |
| 6_65045000 | 6 | 65020000 | 65070000 | 2.37 | 2.31 | 0.278 | 1 | 0.28 | 0.091411 |
| 8_50745000 | 8 | 50720000 | 50770000 | 2.46 | 2.38 | 0.539 | 1 | 0.21 | 0.09135 |
| 6_60785000 | 6 | 60760000 | 60810000 | 3.42 | 2.97 | 0.153 | 1 | -0.45 | 0.091343 |

| **Table S3.** ARG statistics for outlier SNPs found within the region of MC1R (chromosome 16) and SMYD3 (chromosome 12) in the morph comparison (melanic vs. gray). Red shaded cells indicate enrichment scores that were above the p = 0.01 significance threshold. Yellow shaded cells RTH scores that were below the significance threshold. Green shaded cells indicated cross coalescent times that were above the signficiance threshold. | | | | | | | | | |
| --- | --- | --- | --- | --- | --- | --- | --- | --- | --- |
| **peakID** | **Chromosome** | **startPos** | **endPos** | **melanic_enrich** | **gray_enrich** | **melanic_RTH** | **gray_RTH** | **cc_melanic_gray** | **Fst** |
| 16_105000 | 16 | 80000 | 130000 | 1.52 | 1.71 | 1 | 1 | 0.36 | 0.471768 |
| 16_95000 | 16 | 70000 | 120000 | 1.52 | 1.71 | 1 | 1 | 0.36 | 0.469751 |
| 16_175000 | 16 | 150000 | 200000 | 1.17 | 1.42 | 1 | 1 | -0.33 | 0.415488 |
| 16_165000 | 16 | 140000 | 190000 | 1.17 | 1.42 | 1 | 1 | -0.02 | 0.414215 |
| 16_215000 | 16 | 190000 | 240000 | 0.79 | 1.07 | 1 | 1 | -0.34 | 0.41223 |
| 16_115000 | 16 | 90000 | 140000 | 1.52 | 1.68 | 1 | 1 | 0.35 | 0.409611 |
| 16_205000 | 16 | 180000 | 230000 | 0.89 | 0.91 | 1 | 1 | -0.33 | 0.409269 |
| 16_185000 | 16 | 160000 | 210000 | 1.17 | 1.08 | 1 | 1 | -0.33 | 0.406306 |
| 16_195000 | 16 | 170000 | 220000 | 1.17 | 0.91 | 1 | 1 | -0.33 | 0.406185 |
| 16_225000 | 16 | 200000 | 250000 | 0.85 | 1.07 | 1 | 1 | -0.03 | 0.398863 |
| 16_125000 | 16 | 100000 | 150000 | 1.17 | 1.42 | 1 | 1 | 0.3 | 0.393715 |
| 16_235000 | 16 | 210000 | 260000 | 1.17 | 1.07 | 1 | 1 | -0.01 | 0.385763 |
| 16_135000 | 16 | 110000 | 160000 | 1.17 | 1.42 | 1 | 1 | 0.27 | 0.378207 |
| 16_155000 | 16 | 130000 | 180000 | 1.17 | 1.42 | 1 | 1 | 0 | 0.375884 |
| 16_145000 | 16 | 120000 | 170000 | 1.17 | 1.42 | 1 | 1 | 0.16 | 0.366009 |
| 16_245000 | 16 | 220000 | 270000 | 1.24 | 1.07 | 1 | 1 | -0.14 | 0.353135 |
| 16_85000 | 16 | 60000 | 110000 | 1.52 | 1.71 | 1 | 1 | 0.36 | 0.317048 |
| 16_255000 | 16 | 230000 | 280000 | 1.52 | 1.07 | 1 | 1 | -0.15 | 0.316485 |
| 12_60405000 | 12 | 60380000 | 60430000 | 0.55 | 2.18 | 1 | 1 | 0.6 | 0.249608 |
| 12_60415000 | 12 | 60390000 | 60440000 | 0.7 | 2.4 | 1 | 1 | 0.62 | 0.24312 |
| 16_265000 | 16 | 240000 | 290000 | 1.96 | 1.16 | 1 | 1 | -0.17 | 0.232323 |
| 12_60425000 | 12 | 60400000 | 60450000 | 0.85 | 2.88 | 1 | 1 | 0.61 | 0.216168 |
| 16_75000 | 16 | 50000 | 100000 | 1.52 | 1.71 | 1 | 1 | 0.39 | 0.210181 |

| **Table S4.** Outlier SNPs detected using PCAdapt and FST top 1%. Nearest gene associated with each SNP is listed and their general function in house mouse (*Mus musculus*) | | | | | | | | |
| --- | --- | --- | --- | --- | --- | --- | --- | --- |
|  |  |  | **PCAdapt** | **50kb FST window** | | |  |  |
| **peakID** | **Chromosome** | **Position** | **p-value** | **startPos** | **endPos** | **FST** | **mapped gene** | **general gene function in house mouse (*Mus musculus*)** |
| 5_161797476 | 5 | 161797476 | 3.86E-09 | 161790000 | 161840000 | 0.2395 | ATRNL1 | Predicted to enable Notch binding activity. Acts upstream of or within G protein-coupled receptor signaling pathway. Predicted to be located in plasma membrane. Is expressed in several structures, including brain; genitourinary system; liver; lung; and spleen. |
| 5_161821868 | 5 | 161821868 | 2.78E-04 | 161790000 | 161840000 | 0.2395 | ATRNL1 | Predicted to enable Notch binding activity. Acts upstream of or within G protein-coupled receptor signaling pathway. Predicted to be located in plasma membrane. Is expressed in several structures, including brain; genitourinary system; liver; lung; and spleen. |
| 6_68478753 | 6 | 68478753 | 2.41E-08 | 68450000 | 68500000 | 0.2245 | ENSSCRG00010005592 | no annotation available |
| 6_68479841 | 6 | 68479841 | 2.37E-04 | 68450000 | 68500000 | 0.2245 | ENSSCRG00010005592 | no annotation available |
| 6_68480563 | 6 | 68480563 | 1.08E-04 | 68450000 | 68500000 | 0.2245 | ENSSCRG00010005592 | no annotation available |
| 6_68452415 | 6 | 68452415 | 1.02E-04 | 68450000 | 68500000 | 0.2245 | TMEM167A | Predicted to be involved in constitutive secretory pathway; intracellular transport; and protein secretion. |
| 6_68466545 | 6 | 68466545 | 1.99E-04 | 68450000 | 68500000 | 0.2245 | XRCC4 | Involved in double-strand break repair via nonhomologous end joining; negative regulation of protection from non-homologous end joining at telomere; and telomeric DNA-containing double minutes formation. Acts upstream of or within several processes, including DNA metabolic process; hemopoiesis; and response to X-ray. |
| 6_68446945 | 6 | 68446945 | 4.89E-05 | 68440000 | 68490000 | 0.2239 | TMEM167A | Predicted to be involved in constitutive secretory pathway; intracellular transport; and protein secretion. |
| 2_129600997 | 2 | 129600997 | 1.90E-04 | 129590000 | 129640000 | 0.2239 | NOVA1-FABP5 | Enables mRNA 3'-UTR binding activity and sequence-specific mRNA binding activity. Involved in negative regulation of cold-induced thermogenesis and regulation of alternative mRNA splicing, via spliceosome. |
| 6_69460340 | 6 | 69460340 | 9.16E-05 | 69450000 | 69500000 | 0.2229 | EDIL3 | Predicted to enable calcium ion binding activity. Acts upstream of or within positive regulation of cell-substrate adhesion. |
| 5_117519915 | 5 | 117519915 | 6.10E-05 | 117510000 | 117560000 | 0.2198 | REEP3-ENSSCRG00010009059 | Predicted to enable microtubule binding activity. Predicted to be involved in endoplasmic reticulum tubular network organization and mitotic nuclear membrane reassembly. |
| 6_68438496 | 6 | 68438496 | 1.27E-05 | 68430000 | 68480000 | 0.2143 | TMEM167A | Predicted to be involved in constitutive secretory pathway; intracellular transport; and protein secretion. |
| 5_55648059 | 5 | 55648059 | 6.97E-05 | 55640000 | 55690000 | 0.2137 | ENSSCRG00010010592-PCDH20 | This gene belongs to the protocadherin gene family, a subfamily of the cadherin superfamily. The encoded protein contains six extracellular cadherin domains, a transmembrane domain, and a cytoplasmic tail differing from those of the classical cadherins. The encoded protein may play a role in cell adhesion in the nervous system and has been shown to be specifically expressed in newly differentiated olfactory sensory neurons and their axons during development. |
| 5_55674382 | 5 | 55674382 | 3.41E-04 | 55640000 | 55690000 | 0.2137 | ENSSCRG00010010592-PCDH20 | This gene belongs to the protocadherin gene family, a subfamily of the cadherin superfamily. The encoded protein contains six extracellular cadherin domains, a transmembrane domain, and a cytoplasmic tail differing from those of the classical cadherins. The encoded protein may play a role in cell adhesion in the nervous system and has been shown to be specifically expressed in newly differentiated olfactory sensory neurons and their axons during development. |
| 5_55674680 | 5 | 55674680 | 9.35E-06 | 55640000 | 55690000 | 0.2137 | ENSSCRG00010010592-PCDH20 | This gene belongs to the protocadherin gene family, a subfamily of the cadherin superfamily. The encoded protein contains six extracellular cadherin domains, a transmembrane domain, and a cytoplasmic tail differing from those of the classical cadherins. The encoded protein may play a role in cell adhesion in the nervous system and has been shown to be specifically expressed in newly differentiated olfactory sensory neurons and their axons during development. |
| 10_84369509 | 10 | 84369509 | 1.15E-04 | 84320000 | 84370000 | 0.2121 | cox6a1 | Predicted to enable enzyme regulator activity. Predicted to be involved in mitochondrial electron transport, cytochrome c to oxygen. |
| 5_161895602 | 5 | 161895602 | 5.44E-05 | 161850000 | 161900000 | 0.2100 | ATRNL1 | Predicted to enable Notch binding activity. Acts upstream of or within G protein-coupled receptor signaling pathway. Predicted to be located in plasma membrane. Is expressed in several structures, including brain; genitourinary system; liver; lung; and spleen. |
| 6_78393447 | 6 | 78393447 | 2.31E-04 | 78390000 | 78440000 | 0.2091 | FAM172A | Predicted to contribute to siRNA binding activity. Involved in neural crest cell development and regulation of alternative mRNA splicing, via spliceosome. |
| 6_78406443 | 6 | 78406443 | 1.98E-06 | 78390000 | 78440000 | 0.2091 | FAM172A | Predicted to contribute to siRNA binding activity. Involved in neural crest cell development and regulation of alternative mRNA splicing, via spliceosome. |
| 6_78417236 | 6 | 78417236 | 1.06E-04 | 78390000 | 78440000 | 0.2091 | FAM172A | Predicted to contribute to siRNA binding activity. Involved in neural crest cell development and regulation of alternative mRNA splicing, via spliceosome. |
| 6_78417455 | 6 | 78417455 | 1.88E-07 | 78390000 | 78440000 | 0.2091 | FAM172A | Predicted to contribute to siRNA binding activity. Involved in neural crest cell development and regulation of alternative mRNA splicing, via spliceosome. |
| 6_78430846 | 6 | 78430846 | 1.48E-05 | 78390000 | 78440000 | 0.2091 | FAM172A | Predicted to contribute to siRNA binding activity. Involved in neural crest cell development and regulation of alternative mRNA splicing, via spliceosome. |
| 6_78325454 | 6 | 78325454 | 4.76E-07 | 78320000 | 78370000 | 0.2052 | FAM172A | Predicted to contribute to siRNA binding activity. Involved in neural crest cell development and regulation of alternative mRNA splicing, via spliceosome. |
| 6_78331948 | 6 | 78331948 | 3.49E-06 | 78320000 | 78370000 | 0.2052 | FAM172A | Predicted to contribute to siRNA binding activity. Involved in neural crest cell development and regulation of alternative mRNA splicing, via spliceosome. |
| 6_78349126 | 6 | 78349126 | 7.49E-05 | 78320000 | 78370000 | 0.2052 | FAM172A | Predicted to contribute to siRNA binding activity. Involved in neural crest cell development and regulation of alternative mRNA splicing, via spliceosome. |
| 6_78364774 | 6 | 78364774 | 3.60E-04 | 78320000 | 78370000 | 0.2052 | FAM172A | Predicted to contribute to siRNA binding activity. Involved in neural crest cell development and regulation of alternative mRNA splicing, via spliceosome. |
| 5_162002225 | 5 | 162002225 | 1.59E-04 | 161990000 | 162040000 | 0.2050 | ATRNL1 | Predicted to enable Notch binding activity. Acts upstream of or within G protein-coupled receptor signaling pathway. Predicted to be located in plasma membrane. Is expressed in several structures, including brain; genitourinary system; liver; lung; and spleen. |
| 5_162024033 | 5 | 162024033 | 2.01E-04 | 161990000 | 162040000 | 0.2050 | ATRNL1 | Predicted to enable Notch binding activity. Acts upstream of or within G protein-coupled receptor signaling pathway. Predicted to be located in plasma membrane. Is expressed in several structures, including brain; genitourinary system; liver; lung; and spleen. |
| 5_161918742 | 5 | 161918742 | 1.38E-05 | 161910000 | 161960000 | 0.2035 | ATRNL1 | Predicted to enable Notch binding activity. Acts upstream of or within G protein-coupled receptor signaling pathway. Predicted to be located in plasma membrane. Is expressed in several structures, including brain; genitourinary system; liver; lung; and spleen. |
| 5_162046012 | 5 | 162046012 | 1.59E-04 | 162000000 | 162050000 | 0.2026 | ATRNL1 | Predicted to enable Notch binding activity. Acts upstream of or within G protein-coupled receptor signaling pathway. Predicted to be located in plasma membrane. Is expressed in several structures, including brain; genitourinary system; liver; lung; and spleen. |
| 1_115153736 | 1 | 115153736 | 3.14E-08 | 115130000 | 115180000 | 0.2011 | ENSSCRG00010001324-ENSSCRG00010001333 | no annotation available |
| 6_69502416 | 6 | 69502416 | 3.64E-04 | 69460000 | 69510000 | 0.1998 | EDIL3 | Predicted to enable calcium ion binding activity. Acts upstream of or within positive regulation of cell-substrate adhesion. |
| 6_68518875 | 6 | 68518875 | 1.62E-07 | 68470000 | 68520000 | 0.1971 | TMEM167A | Predicted to be involved in constitutive secretory pathway; intracellular transport; and protein secretion. |
| 8_54555284 | 8 | 54555284 | 2.94E-31 | 54510000 | 54560000 | 0.1942 | DMTF1 | Predicted to enable DNA-binding transcription factor activity, RNA polymerase II-specific and RNA polymerase II cis-regulatory region sequence-specific DNA binding activity. Predicted to be involved in regulation of transcription by RNA polymerase II. |
| 8_54526908 | 8 | 54526908 | 1.24E-06 | 54510000 | 54560000 | 0.1942 | TMEM243 | Is expressed in retina inner nuclear layer and retina outer nuclear layer. |
| 5_32094543 | 5 | 32094543 | 3.66E-06 | 32080000 | 32130000 | 0.1939 | DCLK1 | This gene encodes a member of the protein kinase superfamily and the doublecortin family. |
| 5_55614856 | 5 | 55614856 | 1.90E-04 | 55610000 | 55660000 | 0.1931 | ENSSCRG00010010592-PCDH20 | This gene belongs to the protocadherin gene family, a subfamily of the cadherin superfamily. The encoded protein contains six extracellular cadherin domains, a transmembrane domain, and a cytoplasmic tail differing from those of the classical cadherins. The encoded protein may play a role in cell adhesion in the nervous system and has been shown to be specifically expressed in newly differentiated olfactory sensory neurons and their axons during development. |
| 6_68655614 | 6 | 68655614 | 5.12E-06 | 68640000 | 68690000 | 0.1903 | ENSSCRG00010005617 | no annotation available |
| 6_68668299 | 6 | 68668299 | 4.54E-11 | 68640000 | 68690000 | 0.1903 | ENSSCRG00010005617 | no annotation available |
| 6_68668926 | 6 | 68668926 | 2.40E-07 | 68640000 | 68690000 | 0.1903 | ENSSCRG00010005617 | no annotation available |
| 6_68684439 | 6 | 68684439 | 5.70E-05 | 68640000 | 68690000 | 0.1903 | ENSSCRG00010005617 | no annotation available |
| 8_54494060 | 8 | 54494060 | 2.06E-07 | 54490000 | 54540000 | 0.1900 | DMTF1 | Predicted to enable DNA-binding transcription factor activity, RNA polymerase II-specific and RNA polymerase II cis-regulatory region sequence-specific DNA binding activity. Predicted to be involved in regulation of transcription by RNA polymerase II. |
| 8_54497156 | 8 | 54497156 | 1.83E-30 | 54490000 | 54540000 | 0.1900 | DMTF1 | Predicted to enable DNA-binding transcription factor activity, RNA polymerase II-specific and RNA polymerase II cis-regulatory region sequence-specific DNA binding activity. Predicted to be involved in regulation of transcription by RNA polymerase II. |
| 6_77013500 | 6 | 77013500 | 2.21E-06 | 77010000 | 77060000 | 0.1886 | ENSSCRG00010006791-NR2F1 | Enables sequence-specific DNA binding activity. Acts upstream of or within nervous system development and regulation of DNA-templated transcription. |
| 6_77041639 | 6 | 77041639 | 1.27E-04 | 77010000 | 77060000 | 0.1886 | ENSSCRG00010006791-NR2F1 | Enables sequence-specific DNA binding activity. Acts upstream of or within nervous system development and regulation of DNA-templated transcription. |
| 6_77054912 | 6 | 77054912 | 6.49E-08 | 77010000 | 77060000 | 0.1886 | ENSSCRG00010006791-NR2F1 | Enables sequence-specific DNA binding activity. Acts upstream of or within nervous system development and regulation of DNA-templated transcription. |
| 6_68690251 | 6 | 68690251 | 1.22E-14 | 68650000 | 68700000 | 0.1886 | ENSSCRG00010005617 | no annotation available |
| 5_162096041 | 5 | 162096041 | 7.81E-06 | 162080000 | 162130000 | 0.1881 | ATRNL1 | Predicted to enable Notch binding activity. Acts upstream of or within G protein-coupled receptor signaling pathway. Predicted to be located in plasma membrane. Is expressed in several structures, including brain; genitourinary system; liver; lung; and spleen. |
| 6_78388449 | 6 | 78388449 | 2.21E-06 | 78380000 | 78430000 | 0.1867 | FAM172A | Predicted to contribute to siRNA binding activity. Involved in neural crest cell development and regulation of alternative mRNA splicing, via spliceosome. |
| 6_68423380 | 6 | 68423380 | 8.04E-05 | 68420000 | 68470000 | 0.1865 | TMEM167A | Predicted to be involved in constitutive secretory pathway; intracellular transport; and protein secretion. |
| 6_68740053 | 6 | 68740053 | 3.57E-04 | 68730000 | 68780000 | 0.1860 | ENSSCRG00010005617 | no annotation available |
| 6_68743525 | 6 | 68743525 | 5.09E-05 | 68730000 | 68780000 | 0.1860 | ENSSCRG00010005617 | no annotation available |
| 6_68770491 | 6 | 68770491 | 2.80E-04 | 68730000 | 68780000 | 0.1860 | XRCC4 | Involved in double-strand break repair via nonhomologous end joining; negative regulation of protection from non-homologous end joining at telomere; and telomeric DNA-containing double minutes formation. Acts upstream of or within several processes, including DNA metabolic process; hemopoiesis; and response to X-ray. |
| 6_68773627 | 6 | 68773627 | 2.52E-05 | 68730000 | 68780000 | 0.1860 | XRCC4 | Involved in double-strand break repair via nonhomologous end joining; negative regulation of protection from non-homologous end joining at telomere; and telomeric DNA-containing double minutes formation. Acts upstream of or within several processes, including DNA metabolic process; hemopoiesis; and response to X-ray. |
| 2_6867910 | 2 | 6867910 | 9.16E-10 | 6820000 | 6870000 | 0.1860 | ENSSCRG00010005886 | no annotation available |
| 6_78456932 | 6 | 78456932 | 1.15E-04 | 78410000 | 78460000 | 0.1849 | FAM172A | Predicted to contribute to siRNA binding activity. Involved in neural crest cell development and regulation of alternative mRNA splicing, via spliceosome. |
| 6_72070587 | 6 | 72070587 | 1.87E-07 | 72070000 | 72120000 | 0.1826 | ENSSCRG00010005937-ENSSCRG00010005947 | no annotation available |
| 6_68704218 | 6 | 68704218 | 9.68E-05 | 68660000 | 68710000 | 0.1817 | ENSSCRG00010005617 | no annotation available |
| 6_77002460 | 6 | 77002460 | 2.21E-06 | 77000000 | 77050000 | 0.1814 | ENSSCRG00010006791-NR2F1 | Enables sequence-specific DNA binding activity. Acts upstream of or within nervous system development and regulation of DNA-templated transcription. |
| 6_68724535 | 6 | 68724535 | 3.75E-04 | 68720000 | 68770000 | 0.1810 | ENSSCRG00010005617 | no annotation available |
| 5_32157031 | 5 | 32157031 | 1.06E-05 | 32110000 | 32160000 | 0.1774 | DCLK1 | This gene encodes a member of the protein kinase superfamily and the doublecortin family. |
| 5_59775089 | 5 | 59775089 | 2.28E-04 | 59750000 | 59800000 | 0.1760 | ENSSCRG00010010698 | no annotation available |
| 10_36035076 | 10 | 36035076 | 2.24E-04 | 36000000 | 36050000 | 0.1757 | ENSSCRG00010017836-FSTL5 | Predicted to enable calcium ion binding activity. Predicted to be involved in cell differentiation and regulation of BMP signaling pathway. |
| 6_58333468 | 6 | 58333468 | 3.08E-04 | 58320000 | 58370000 | 0.1751 | SV2C | Predicted to enable transmembrane transporter activity. Involved in regulation of synaptic vesicle exocytosis. |
| 6_58368053 | 6 | 58368053 | 1.52E-04 | 58320000 | 58370000 | 0.1751 | SV2C | Predicted to enable transmembrane transporter activity. Involved in regulation of synaptic vesicle exocytosis. |
| 5_162067048 | 5 | 162067048 | 1.10E-07 | 162060000 | 162110000 | 0.1751 | ATRNL1 | Predicted to enable Notch binding activity. Acts upstream of or within G protein-coupled receptor signaling pathway. Predicted to be located in plasma membrane. Is expressed in several structures, including brain; genitourinary system; liver; lung; and spleen. |
| 1_120503907 | 1 | 120503907 | 8.82E-05 | 120490000 | 120540000 | 0.1744 | MFSD14A | Predicted to enable transmembrane transporter activity. Acts upstream of or within acrosome assembly; sperm mitochondrion organization; and spermatid nucleus differentiation. |
| 1_120515087 | 1 | 120515087 | 6.17E-05 | 120490000 | 120540000 | 0.1744 | MFSD14A | Predicted to enable transmembrane transporter activity. Acts upstream of or within acrosome assembly; sperm mitochondrion organization; and spermatid nucleus differentiation. |
| 1_120520806 | 1 | 120520806 | 5.44E-08 | 120490000 | 120540000 | 0.1744 | SLC35A3 | no annotation available |
| 1_120526499 | 1 | 120526499 | 5.06E-05 | 120490000 | 120540000 | 0.1744 | SLC35A3 | no annotation available |
| 1_120539687 | 1 | 120539687 | 6.84E-06 | 120490000 | 120540000 | 0.1744 | SLC35A3 | no annotation available |
| 6_68269894 | 6 | 68269894 | 2.28E-04 | 68260000 | 68310000 | 0.1730 | Atp6ap1l-TMEM167A | Predicted to enable ATPase activator activity. Predicted to be involved in regulation of cellular pH. |
| 6_68288795 | 6 | 68288795 | 1.16E-04 | 68260000 | 68310000 | 0.1730 | Atp6ap1l-TMEM167A | Predicted to enable ATPase activator activity. Predicted to be involved in regulation of cellular pH. |
| 6_77857334 | 6 | 77857334 | 6.31E-05 | 77830000 | 77880000 | 0.1726 | ENSSCRG00010006791-NR2F1 | Enables sequence-specific DNA binding activity. Acts upstream of or within nervous system development and regulation of DNA-templated transcription. |
| 6_77865494 | 6 | 77865494 | 5.87E-05 | 77830000 | 77880000 | 0.1726 | ENSSCRG00010006791-NR2F1 | Enables sequence-specific DNA binding activity. Acts upstream of or within nervous system development and regulation of DNA-templated transcription. |
| 6_77870823 | 6 | 77870823 | 1.49E-04 | 77830000 | 77880000 | 0.1726 | ENSSCRG00010006791-NR2F1 | Enables sequence-specific DNA binding activity. Acts upstream of or within nervous system development and regulation of DNA-templated transcription. |
| 6_68536668 | 6 | 68536668 | 1.16E-04 | 68490000 | 68540000 | 0.1722 | TMEM167A | Predicted to be involved in constitutive secretory pathway; intracellular transport; and protein secretion. |
| 5_162199658 | 5 | 162199658 | 1.00E-07 | 162170000 | 162220000 | 0.1702 | ATRNL1 | Predicted to enable Notch binding activity. Acts upstream of or within G protein-coupled receptor signaling pathway. Predicted to be located in plasma membrane. Is expressed in several structures, including brain; genitourinary system; liver; lung; and spleen. |
| 1_120485693 | 1 | 120485693 | 1.18E-05 | 120480000 | 120530000 | 0.1699 | MFSD14A | Predicted to enable transmembrane transporter activity. Acts upstream of or within acrosome assembly; sperm mitochondrion organization; and spermatid nucleus differentiation. |
| 6_58379094 | 6 | 58379094 | 8.13E-05 | 58330000 | 58380000 | 0.1699 | SV2C | Predicted to enable transmembrane transporter activity. Involved in regulation of synaptic vesicle exocytosis. |
| 5_31550995 | 5 | 31550995 | 2.16E-04 | 31520000 | 31570000 | 0.1688 | ENSSCRG00010004782 | no annotation available |
| 2_6800905 | 2 | 6800905 | 1.80E-04 | 6800000 | 6850000 | 0.1678 | ENSSCRG00010005879-ENSSCRG00010005886 | no annotation available |
| 2_6806700 | 2 | 6806700 | 3.09E-05 | 6800000 | 6850000 | 0.1678 | ENSSCRG00010005879-ENSSCRG00010005886 | no annotation available |
| 6_68240639 | 6 | 68240639 | 9.60E-05 | 68220000 | 68270000 | 0.1676 | Atp6ap1l-TMEM167A | Predicted to enable ATPase activator activity. Predicted to be involved in regulation of cellular pH. |
| 6_68246673 | 6 | 68246673 | 1.68E-05 | 68220000 | 68270000 | 0.1676 | Atp6ap1l-TMEM167A | Predicted to enable ATPase activator activity. Predicted to be involved in regulation of cellular pH. |
| 2_129570440 | 2 | 129570440 | 2.48E-05 | 129570000 | 129620000 | 0.1667 | NOVA1-FABP5 | Enables mRNA 3'-UTR binding activity and sequence-specific mRNA binding activity. Involved in negative regulation of cold-induced thermogenesis and regulation of alternative mRNA splicing, via spliceosome. |
| 16_66425496 | 16 | 66425496 | 1.38E-04 | 66380000 | 66430000 | 0.1664 | ENSSCRG00010018130 | no annotation available |
| 1_120466501 | 1 | 120466501 | 9.08E-06 | 120450000 | 120500000 | 0.1663 | SLC35A3 | no annotation available |
| 6_66898837 | 6 | 66898837 | 9.79E-05 | 66860000 | 66910000 | 0.1650 | SSBP2 | Predicted to enable single-stranded DNA binding activity. Predicted to be involved in positive regulation of transcription by RNA polymerase II. |
| 2_7383214 | 2 | 7383214 | 2.25E-04 | 7370000 | 7420000 | 0.1649 | DOK5 | Acts upstream of or within cell surface receptor protein tyrosine kinase signaling pathway; neuron differentiation; and positive regulation of MAPK cascade. |
| 6_74318987 | 6 | 74318987 | 7.06E-05 | 74300000 | 74350000 | 0.1634 | MEF2C-ENSSCRG00010006300 | Enables several functions, including DNA-binding transcription activator activity, RNA polymerase II-specific; HMG box domain binding activity; and histone deacetylase binding activity. Involved in several processes, including heart development; modulation of chemical synaptic transmission; and positive regulation of cell differentiation. |
| 6_74322369 | 6 | 74322369 | 7.85E-05 | 74300000 | 74350000 | 0.1634 | MEF2C-ENSSCRG00010006300 | Enables several functions, including DNA-binding transcription activator activity, RNA polymerase II-specific; HMG box domain binding activity; and histone deacetylase binding activity. Involved in several processes, including heart development; modulation of chemical synaptic transmission; and positive regulation of cell differentiation. |
| 6_72954812 | 6 | 72954812 | 3.70E-05 | 72930000 | 72980000 | 0.1627 | CCNH-TMEM161B | Enables kinase activity. Predicted to be involved in several processes, including protein stabilization; regulation of G1/S transition of mitotic cell cycle; and transcription initiation at RNA polymerase II promoter. |
| 6_74903996 | 6 | 74903996 | 8.93E-05 | 74890000 | 74940000 | 0.1623 | ENSSCRG00010006300-CETN3 | Enables G-protein beta/gamma-subunit complex binding activity and microtubule binding activity. Predicted to be involved in microtubule cytoskeleton organization. |
| 6_74918739 | 6 | 74918739 | 3.58E-07 | 74890000 | 74940000 | 0.1623 | ENSSCRG00010006300-CETN3 | Enables G-protein beta/gamma-subunit complex binding activity and microtubule binding activity. Predicted to be involved in microtubule cytoskeleton organization. |
| 5_122218121 | 5 | 122218121 | 5.26E-07 | 122200000 | 122250000 | 0.1623 | ENSSCRG00010015995 | no annotation available |
| 5_122239158 | 5 | 122239158 | 6.57E-06 | 122200000 | 122250000 | 0.1623 | PCBD1 | no annotation available |
| 5_117336649 | 5 | 117336649 | 7.52E-06 | 117330000 | 117380000 | 0.1622 | REEP3-ENSSCRG00010009059 | Predicted to enable microtubule binding activity. Predicted to be involved in endoplasmic reticulum tubular network organization and mitotic nuclear membrane reassembly. |
| 5_117337491 | 5 | 117337491 | 2.67E-05 | 117330000 | 117380000 | 0.1622 | REEP3-ENSSCRG00010009059 | Predicted to enable microtubule binding activity. Predicted to be involved in endoplasmic reticulum tubular network organization and mitotic nuclear membrane reassembly. |
| 5_117356881 | 5 | 117356881 | 3.00E-04 | 117330000 | 117380000 | 0.1622 | REEP3-ENSSCRG00010009059 | Predicted to enable microtubule binding activity. Predicted to be involved in endoplasmic reticulum tubular network organization and mitotic nuclear membrane reassembly. |
| 6_68327111 | 6 | 68327111 | 4.11E-05 | 68290000 | 68340000 | 0.1619 | Atp6ap1l-TMEM167A | Predicted to enable ATPase activator activity. Predicted to be involved in regulation of cellular pH. |
| 5_116975226 | 5 | 116975226 | 1.52E-04 | 116950000 | 117000000 | 0.1615 | REEP3-ENSSCRG00010009059 | Predicted to enable microtubule binding activity. Predicted to be involved in endoplasmic reticulum tubular network organization and mitotic nuclear membrane reassembly. |
| 5_116991137 | 5 | 116991137 | 3.11E-04 | 116950000 | 117000000 | 0.1615 | REEP3-ENSSCRG00010009059 | Predicted to enable microtubule binding activity. Predicted to be involved in endoplasmic reticulum tubular network organization and mitotic nuclear membrane reassembly. |
| 5_116997686 | 5 | 116997686 | 6.61E-07 | 116950000 | 117000000 | 0.1615 | REEP3-ENSSCRG00010009059 | Predicted to enable microtubule binding activity. Predicted to be involved in endoplasmic reticulum tubular network organization and mitotic nuclear membrane reassembly. |
| 6_77067541 | 6 | 77067541 | 1.03E-07 | 77020000 | 77070000 | 0.1606 | ENSSCRG00010006791-NR2F1 | Enables sequence-specific DNA binding activity. Acts upstream of or within nervous system development and regulation of DNA-templated transcription. |
| 1_120367770 | 1 | 120367770 | 3.70E-04 | 120360000 | 120410000 | 0.1602 | ENSSCRG00010001965 | no annotation available |
| 1_120389013 | 1 | 120389013 | 4.40E-06 | 120360000 | 120410000 | 0.1602 | ENSSCRG00010001965 | no annotation available |
| 1_120405219 | 1 | 120405219 | 1.40E-06 | 120360000 | 120410000 | 0.1602 | TRMT13 | Predicted to enable tRNA methyltransferase activity. Predicted to be involved in tRNA methylation. |
| 1_120207492 | 1 | 120207492 | 1.07E-04 | 120200000 | 120250000 | 0.1602 | CDC14A | Predicted to enable protein serine/threonine phosphatase activity and protein tyrosine phosphatase activity. Involved in sensory perception of sound. |
| 1_120219897 | 1 | 120219897 | 1.62E-05 | 120200000 | 120250000 | 0.1602 | CDC14A | Predicted to enable protein serine/threonine phosphatase activity and protein tyrosine phosphatase activity. Involved in sensory perception of sound. |
| 1_120416553 | 1 | 120416553 | 6.79E-06 | 120370000 | 120420000 | 0.1593 | TRMT13 | Predicted to enable tRNA methyltransferase activity. Predicted to be involved in tRNA methylation. |
| 6_68341371 | 6 | 68341371 | 6.02E-05 | 68300000 | 68350000 | 0.1583 | Atp6ap1l-TMEM167A | Predicted to enable ATPase activator activity. Predicted to be involved in regulation of cellular pH. |
| 6_77880912 | 6 | 77880912 | 1.38E-04 | 77840000 | 77890000 | 0.1581 | ENSSCRG00010006791-NR2F1 | Enables sequence-specific DNA binding activity. Acts upstream of or within nervous system development and regulation of DNA-templated transcription. |
| 6_74886654 | 6 | 74886654 | 2.56E-06 | 74880000 | 74930000 | 0.1575 | ENSSCRG00010006300-CETN3 | Enables G-protein beta/gamma-subunit complex binding activity and microtubule binding activity. Predicted to be involved in microtubule cytoskeleton organization. |
| 6_74889237 | 6 | 74889237 | 6.79E-06 | 74880000 | 74930000 | 0.1575 | ENSSCRG00010006300-CETN3 | Enables G-protein beta/gamma-subunit complex binding activity and microtubule binding activity. Predicted to be involved in microtubule cytoskeleton organization. |
| 6_68540038 | 6 | 68540038 | 8.20E-05 | 68510000 | 68560000 | 0.1574 | TMEM167A | Predicted to be involved in constitutive secretory pathway; intracellular transport; and protein secretion. |
| 6_68546865 | 6 | 68546865 | 1.43E-04 | 68510000 | 68560000 | 0.1574 | XRCC4 | Involved in double-strand break repair via nonhomologous end joining; negative regulation of protection from non-homologous end joining at telomere; and telomeric DNA-containing double minutes formation. Acts upstream of or within several processes, including DNA metabolic process; hemopoiesis; and response to X-ray. |
| 6_68559166 | 6 | 68559166 | 2.31E-11 | 68510000 | 68560000 | 0.1574 | XRCC4 | Involved in double-strand break repair via nonhomologous end joining; negative regulation of protection from non-homologous end joining at telomere; and telomeric DNA-containing double minutes formation. Acts upstream of or within several processes, including DNA metabolic process; hemopoiesis; and response to X-ray. |
| 2_8061264 | 2 | 8061264 | 2.91E-07 | 8050000 | 8100000 | 0.1554 | BCAS1-ZNF217 | Predicted to enable protein homodimerization activity. Involved in myelination. Predicted to be located in cytosol. Predicted to be active in synapse. |
| 2_8075995 | 2 | 8075995 | 3.98E-05 | 8050000 | 8100000 | 0.1554 | BCAS1-ZNF217 | Predicted to enable protein homodimerization activity. Involved in myelination. Predicted to be located in cytosol. Predicted to be active in synapse. |
| 1_115468774 | 1 | 115468774 | 7.61E-06 | 115450000 | 115500000 | 0.1538 | ENSSCRG00010001333 | no annotation available |
| 1_115487887 | 1 | 115487887 | 1.66E-06 | 115450000 | 115500000 | 0.1538 | ENSSCRG00010001333 | no annotation available |
| 6_129062035 | 6 | 129062035 | 6.26E-09 | 129060000 | 129110000 | 0.1538 | ENSSCRG00010019700-PITX1 | The *PITX1* gene provides instructions for making a protein that plays a critical role in development of the lower limbs. |
| 6_129085451 | 6 | 129085451 | 1.06E-04 | 129060000 | 129110000 | 0.1538 | ENSSCRG00010019700-PITX1 | The *PITX1* gene provides instructions for making a protein that plays a critical role in development of the lower limbs. |
| 1_120440544 | 1 | 120440544 | 4.97E-07 | 120430000 | 120480000 | 0.1536 | TRMT13 | Predicted to enable tRNA methyltransferase activity. Predicted to be involved in tRNA methylation. |
| 5_162228730 | 5 | 162228730 | 9.88E-06 | 162180000 | 162230000 | 0.1534 | ATRNL1 | Predicted to enable Notch binding activity. Acts upstream of or within G protein-coupled receptor signaling pathway. Predicted to be located in plasma membrane. Is expressed in several structures, including brain; genitourinary system; liver; lung; and spleen. |
| 6_68146798 | 6 | 68146798 | 1.48E-05 | 68140000 | 68190000 | 0.1528 | Atp6ap1l-TMEM167A | Predicted to enable ATPase activator activity. Predicted to be involved in regulation of cellular pH. |
| 3_113338944 | 3 | 113338944 | 1.39E-04 | 113330000 | 113380000 | 0.1525 | KCNH7-FIGN | Predicted to enable inward rectifier potassium channel activity. Predicted to be involved in potassium ion transmembrane transport and regulation of membrane potential. |
| 3_113355336 | 3 | 113355336 | 1.48E-04 | 113330000 | 113380000 | 0.1525 | KCNH7-FIGN | Predicted to enable inward rectifier potassium channel activity. Predicted to be involved in potassium ion transmembrane transport and regulation of membrane potential. |
| 2_7423537 | 2 | 7423537 | 6.43E-07 | 7380000 | 7430000 | 0.1521 | DOK5 | Acts upstream of or within cell surface receptor protein tyrosine kinase signaling pathway; neuron differentiation; and positive regulation of MAPK cascade. |
| 6_68579042 | 6 | 68579042 | 4.17E-11 | 68540000 | 68590000 | 0.1517 | XRCC4 | Involved in double-strand break repair via nonhomologous end joining; negative regulation of protection from non-homologous end joining at telomere; and telomeric DNA-containing double minutes formation. Acts upstream of or within several processes, including DNA metabolic process; hemopoiesis; and response to X-ray. |
| 6_75097806 | 6 | 75097806 | 2.14E-04 | 75050000 | 75100000 | 0.1504 | ENSSCRG00010006300-CETN3 | Enables G-protein beta/gamma-subunit complex binding activity and microtubule binding activity. Predicted to be involved in microtubule cytoskeleton organization. |
| 6_77550076 | 6 | 77550076 | 1.02E-04 | 77550000 | 77600000 | 0.1504 | ENSSCRG00010006791-NR2F1 | Enables sequence-specific DNA binding activity. Acts upstream of or within nervous system development and regulation of DNA-templated transcription. |
| 6_77559192 | 6 | 77559192 | 1.96E-04 | 77550000 | 77600000 | 0.1504 | ENSSCRG00010006791-NR2F1 | Enables sequence-specific DNA binding activity. Acts upstream of or within nervous system development and regulation of DNA-templated transcription. |
| 1_115441482 | 1 | 115441482 | 2.51E-04 | 115440000 | 115490000 | 0.1504 | ENSSCRG00010001333 | no annotation available |
| 5_55700692 | 5 | 55700692 | 1.09E-04 | 55660000 | 55710000 | 0.1501 | ENSSCRG00010010592-PCDH20 | This gene belongs to the protocadherin gene family, a subfamily of the cadherin superfamily. The encoded protein contains six extracellular cadherin domains, a transmembrane domain, and a cytoplasmic tail differing from those of the classical cadherins. The encoded protein may play a role in cell adhesion in the nervous system and has been shown to be specifically expressed in newly differentiated olfactory sensory neurons and their axons during development. |
| 2_6212677 | 2 | 6212677 | 1.30E-06 | 6170000 | 6220000 | 0.1499 | CBLN4 | Involved in inhibitory synapse assembly and trans-synaptic signaling, modulating synaptic transmission. Acts upstream of or within protein secretion. |
| 2_6186338 | 2 | 6186338 | 4.83E-05 | 6170000 | 6220000 | 0.1499 | MC3R-CBLN4 | This gene maps to the same region as the locus for benign neonatal epilepsy. Mice deficient for this gene have increased fat mass despite decreased food intake, suggesting a role for this gene product in the regulation of energy homeostasis. |
| 2_6200017 | 2 | 6200017 | 7.17E-05 | 6170000 | 6220000 | 0.1499 | MC3R-CBLN4 | This gene maps to the same region as the locus for benign neonatal epilepsy. Mice deficient for this gene have increased fat mass despite decreased food intake, suggesting a role for this gene product in the regulation of energy homeostasis. |
| 5_27087845 | 5 | 27087845 | 2.38E-05 | 27050000 | 27100000 | 0.1498 | ENSSCRG00010000877 | no annotation available |
| 6_79310198 | 6 | 79310198 | 8.36E-06 | 79270000 | 79320000 | 0.1490 | MCTP1 | Predicted to enable calcium ion binding activity. Predicted to be involved in several processes, including negative regulation of endocytosis; negative regulation of response to oxidative stress; and regulation of neurotransmitter secretion |
| 8_54461588 | 8 | 54461588 | 2.03E-30 | 54460000 | 54510000 | 0.1489 | TMEM243 | Is expressed in retina inner nuclear layer and retina outer nuclear layer. |
| 6_68882036 | 6 | 68882036 | 5.04E-05 | 68880000 | 68930000 | 0.1486 | VCAN | Enables protein phosphatase binding activity. Involved in ureteric bud development. |
| 6_68923097 | 6 | 68923097 | 9.13E-06 | 68880000 | 68930000 | 0.1486 | VCAN | Enables protein phosphatase binding activity. Involved in ureteric bud development. |
| 8_54577818 | 8 | 54577818 | 1.44E-08 | 54530000 | 54580000 | 0.1477 | DMTF1 | Predicted to enable DNA-binding transcription factor activity, RNA polymerase II-specific and RNA polymerase II cis-regulatory region sequence-specific DNA binding activity. Predicted to be involved in regulation of transcription by RNA polymerase II. |
| 5_32060957 | 5 | 32060957 | 3.68E-04 | 32050000 | 32100000 | 0.1471 | DCLK1 | This gene encodes a member of the protein kinase superfamily and the doublecortin family. |
| 6_74874082 | 6 | 74874082 | 2.17E-04 | 74870000 | 74920000 | 0.1470 | ENSSCRG00010006300-CETN3 | Enables G-protein beta/gamma-subunit complex binding activity and microtubule binding activity. Predicted to be involved in microtubule cytoskeleton organization. |
| 6_58280667 | 6 | 58280667 | 7.84E-05 | 58260000 | 58310000 | 0.1470 | SV2C | Predicted to enable transmembrane transporter activity. Involved in regulation of synaptic vesicle exocytosis. |
| 6_72981265 | 6 | 72981265 | 7.65E-07 | 72940000 | 72990000 | 0.1469 | CCNH-TMEM161B | Enables kinase activity. Predicted to be involved in several processes, including protein stabilization; regulation of G1/S transition of mitotic cell cycle; and transcription initiation at RNA polymerase II promoter. |
| 2_8128394 | 2 | 8128394 | 2.17E-06 | 8080000 | 8130000 | 0.1465 | ZNF217 | Predicted to enable DNA-binding transcription repressor activity, RNA polymerase II-specific and RNA polymerase II cis-regulatory region sequence-specific DNA binding activity. |
| 5_117391919 | 5 | 117391919 | 8.22E-05 | 117350000 | 117400000 | 0.1463 | REEP3-ENSSCRG00010009059 | Predicted to enable microtubule binding activity. Predicted to be involved in endoplasmic reticulum tubular network organization and mitotic nuclear membrane reassembly. |
| 9_80370261 | 9 | 80370261 | 8.19E-05 | 80360000 | 80410000 | 0.1463 | CD200 | Predicted to enable protein binding activity involved in heterotypic cell-cell adhesion. Involved in negative regulation of cell population proliferation; negative regulation of macrophage activation; and negative regulation of neuroinflammatory response. |
| 5_32033952 | 5 | 32033952 | 2.56E-05 | 32020000 | 32070000 | 0.1463 | DCLK1 | This gene encodes a member of the protein kinase superfamily and the doublecortin family. |
| 5_32045666 | 5 | 32045666 | 2.28E-04 | 32020000 | 32070000 | 0.1463 | DCLK1 | This gene encodes a member of the protein kinase superfamily and the doublecortin family. |
| 6_67504454 | 6 | 67504454 | 2.61E-04 | 67500000 | 67550000 | 0.1463 | ATG10 | Enables Atg12 conjugating enzyme activity. Acts upstream of or within positive regulation of protein modification process and protein lipidation. |
| 5_55711145 | 5 | 55711145 | 2.48E-04 | 55680000 | 55730000 | 0.1447 | ENSSCRG00010010592-PCDH20 | This gene belongs to the protocadherin gene family, a subfamily of the cadherin superfamily. The encoded protein contains six extracellular cadherin domains, a transmembrane domain, and a cytoplasmic tail differing from those of the classical cadherins. The encoded protein may play a role in cell adhesion in the nervous system and has been shown to be specifically expressed in newly differentiated olfactory sensory neurons and their axons during development. |
| 2_7191392 | 2 | 7191392 | 9.78E-05 | 7190000 | 7240000 | 0.1445 | ENSSCRG00010005886-DOK5 | Acts upstream of or within cell surface receptor protein tyrosine kinase signaling pathway; neuron differentiation; and positive regulation of MAPK cascade. |
| 10_40393443 | 10 | 40393443 | 2.38E-04 | 40390000 | 40440000 | 0.1443 | ENSSCRG00010018320-ENSSCRG00010018332 | no annotation available |
| 11_121193664 | 11 | 121193664 | 6.56E-05 | 121150000 | 121200000 | 0.1439 | ENSSCRG00010021578-UBASH3B | Enables phosphoprotein binding activity and protein tyrosine phosphatase activity. Involved in regulation of osteoclast differentiation. |
| 6_68592105 | 6 | 68592105 | 3.48E-08 | 68570000 | 68620000 | 0.1435 | XRCC4 | Involved in double-strand break repair via nonhomologous end joining; negative regulation of protection from non-homologous end joining at telomere; and telomeric DNA-containing double minutes formation. Acts upstream of or within several processes, including DNA metabolic process; hemopoiesis; and response to X-ray. |
| 6_68603146 | 6 | 68603146 | 3.75E-04 | 68570000 | 68620000 | 0.1435 | XRCC4 | Involved in double-strand break repair via nonhomologous end joining; negative regulation of protection from non-homologous end joining at telomere; and telomeric DNA-containing double minutes formation. Acts upstream of or within several processes, including DNA metabolic process; hemopoiesis; and response to X-ray. |
| 6_68611351 | 6 | 68611351 | 1.16E-07 | 68570000 | 68620000 | 0.1435 | XRCC4 | Involved in double-strand break repair via nonhomologous end joining; negative regulation of protection from non-homologous end joining at telomere; and telomeric DNA-containing double minutes formation. Acts upstream of or within several processes, including DNA metabolic process; hemopoiesis; and response to X-ray. |
| 6_73672811 | 6 | 73672811 | 1.21E-04 | 73670000 | 73720000 | 0.1434 | TMEM161B-ENSSCRG00010006082 | Involved in regulation of cardiac muscle cell action potential and regulation of heart rate. |
| 12_97894455 | 12 | 97894455 | 1.07E-05 | 97880000 | 97930000 | 0.1412 | ENSSCRG00010021012-ENSSCRG00010021034 | no annotation available |
| 5_33990455 | 5 | 33990455 | 7.11E-06 | 33970000 | 34020000 | 0.1410 | TRPC4-UFM1 | Enables inositol 1,4,5 trisphosphate binding activity. Acts upstream of or within gamma-aminobutyric acid secretion and oligodendrocyte differentiation. |
| 5_34015686 | 5 | 34015686 | 9.17E-07 | 33970000 | 34020000 | 0.1410 | TRPC4-UFM1 | Enables inositol 1,4,5 trisphosphate binding activity. Acts upstream of or within gamma-aminobutyric acid secretion and oligodendrocyte differentiation. |
| 6_68936603 | 6 | 68936603 | 3.79E-04 | 68890000 | 68940000 | 0.1408 | VCAN | Enables protein phosphatase binding activity. Involved in ureteric bud development. |
| 6_129117538 | 6 | 129117538 | 1.90E-06 | 129070000 | 129120000 | 0.1408 | ENSSCRG00010019700-PITX1 | The *PITX1* gene provides instructions for making a protein that plays a critical role in development of the lower limbs. |
| 6_69949290 | 6 | 69949290 | 1.17E-04 | 69940000 | 69990000 | 0.1407 | EDIL3-ENSSCRG00010005906 | Predicted to enable calcium ion binding activity. Acts upstream of or within positive regulation of cell-substrate adhesion. |
| 6_69954523 | 6 | 69954523 | 3.57E-04 | 69940000 | 69990000 | 0.1407 | EDIL3-ENSSCRG00010005906 | Predicted to enable calcium ion binding activity. Acts upstream of or within positive regulation of cell-substrate adhesion. |
| 6_69962818 | 6 | 69962818 | 7.55E-06 | 69940000 | 69990000 | 0.1407 | EDIL3-ENSSCRG00010005906 | Predicted to enable calcium ion binding activity. Acts upstream of or within positive regulation of cell-substrate adhesion. |
| 6_69979529 | 6 | 69979529 | 4.95E-05 | 69940000 | 69990000 | 0.1407 | EDIL3-ENSSCRG00010005906 | Predicted to enable calcium ion binding activity. Acts upstream of or within positive regulation of cell-substrate adhesion. |
| 4_49650561 | 4 | 49650561 | 9.07E-08 | 49620000 | 49670000 | 0.1406 | SARAF | Predicted to be involved in regulation of store-operated calcium entry. |
| 6_75111375 | 6 | 75111375 | 5.76E-05 | 75070000 | 75120000 | 0.1401 | ENSSCRG00010006300-CETN3 | Enables G-protein beta/gamma-subunit complex binding activity and microtubule binding activity. Predicted to be involved in microtubule cytoskeleton organization. |
| 13_90473153 | 13 | 90473153 | 5.62E-05 | 90470000 | 90520000 | 0.1401 | CMPK2-SOX11 | Predicted to enable nucleobase-containing compound kinase activity. Acts upstream of or within cellular response to lipopolysaccharide. Predicted to be located in nucleoplasm. |
| 6_67554757 | 6 | 67554757 | 7.13E-05 | 67540000 | 67590000 | 0.1397 | ENSSCRG00010005531 | no annotation available |
| 6_67568009 | 6 | 67568009 | 2.98E-04 | 67540000 | 67590000 | 0.1397 | ENSSCRG00010005531 | no annotation available |
| 1_115437239 | 1 | 115437239 | 2.70E-08 | 115430000 | 115480000 | 0.1394 | ENSSCRG00010001333 | no annotation available |
| 6_73736963 | 6 | 73736963 | 3.29E-04 | 73690000 | 73740000 | 0.1393 | ENSSCRG00010006082 | no annotation available |
| 8_14036389 | 8 | 14036389 | 1.66E-04 | 14020000 | 14070000 | 0.1391 | DENND11 | Predicted to enable guanyl-nucleotide exchange factor activity. |
| 5_55731942 | 5 | 55731942 | 1.90E-04 | 55690000 | 55740000 | 0.1385 | PCDH20 | This gene belongs to the protocadherin gene family, a subfamily of the cadherin superfamily. The encoded protein contains six extracellular cadherin domains, a transmembrane domain, and a cytoplasmic tail differing from those of the classical cadherins. The encoded protein may play a role in cell adhesion in the nervous system and has been shown to be specifically expressed in newly differentiated olfactory sensory neurons and their axons during development. |
| 6_58026682 | 6 | 58026682 | 1.82E-04 | 58020000 | 58070000 | 0.1373 | IQGAP2 | Predicted to enable several functions, including Arp2/3 complex binding activity; GTPase activator activity; and calmodulin binding activity. |
| 6_58079865 | 6 | 58079865 | 5.84E-05 | 58030000 | 58080000 | 0.1364 | IQGAP2 | Predicted to enable several functions, including Arp2/3 complex binding activity; GTPase activator activity; and calmodulin binding activity. |
| 13_90466790 | 13 | 90466790 | 3.03E-04 | 90460000 | 90510000 | 0.1362 | CMPK2-SOX11 | Predicted to enable nucleobase-containing compound kinase activity. Acts upstream of or within cellular response to lipopolysaccharide. Predicted to be located in nucleoplasm. |
| 6_76439851 | 6 | 76439851 | 4.02E-06 | 76430000 | 76480000 | 0.1362 | ARRDC3-ENSSCRG00010006791 | Predicted to enable beta-3 adrenergic receptor binding activity. Involved in negative regulation of cold-induced thermogenesis. Acts upstream of or within several processes, including fat pad development; negative regulation of adenylate cyclase-activating adrenergic receptor signaling pathway; and negative regulation of locomotion involved in locomotory behavior. |
| 6_76453296 | 6 | 76453296 | 1.86E-04 | 76430000 | 76480000 | 0.1362 | ARRDC3-ENSSCRG00010006791 | Predicted to enable beta-3 adrenergic receptor binding activity. Involved in negative regulation of cold-induced thermogenesis. Acts upstream of or within several processes, including fat pad development; negative regulation of adenylate cyclase-activating adrenergic receptor signaling pathway; and negative regulation of locomotion involved in locomotory behavior. |
| 6_76461203 | 6 | 76461203 | 1.68E-05 | 76430000 | 76480000 | 0.1362 | ARRDC3-ENSSCRG00010006791 | Predicted to enable beta-3 adrenergic receptor binding activity. Involved in negative regulation of cold-induced thermogenesis. Acts upstream of or within several processes, including fat pad development; negative regulation of adenylate cyclase-activating adrenergic receptor signaling pathway; and negative regulation of locomotion involved in locomotory behavior. |
| 6_76471682 | 6 | 76471682 | 2.16E-09 | 76430000 | 76480000 | 0.1362 | ARRDC3-ENSSCRG00010006791 | Predicted to enable beta-3 adrenergic receptor binding activity. Involved in negative regulation of cold-induced thermogenesis. Acts upstream of or within several processes, including fat pad development; negative regulation of adenylate cyclase-activating adrenergic receptor signaling pathway; and negative regulation of locomotion involved in locomotory behavior. |
| 6_56976856 | 6 | 56976856 | 3.41E-04 | 56970000 | 57020000 | 0.1356 | ENSSCRG00010011381-Gm15294 | no annotation available |
| 6_57003990 | 6 | 57003990 | 1.75E-04 | 56970000 | 57020000 | 0.1356 | ENSSCRG00010011381-Gm15294 | no annotation available |
| 2_7663144 | 2 | 7663144 | 1.95E-05 | 7660000 | 7710000 | 0.1354 | DOK5-PFDN4 | Acts upstream of or within cell surface receptor protein tyrosine kinase signaling pathway; neuron differentiation; and positive regulation of MAPK cascade. |
| 6_75533076 | 6 | 75533076 | 2.82E-04 | 75490000 | 75540000 | 0.1350 | ADGRV1 | Enables several functions, including G-protein alpha-subunit binding activity; adenylate cyclase inhibitor activity; and myosin binding activity. Involved in several processes, including negative regulation of adenylate cyclase activity; positive regulation of bone mineralization; and self proteolysis. Acts upstream of or within several processes, including detection of mechanical stimulus involved in sensory perception of sound; inner ear receptor cell stereocilium organization; and positive regulation of cAMP/PKA signal transduction. |
| 13_77647172 | 13 | 77647172 | 4.07E-07 | 77600000 | 77650000 | 0.1233 | ENSSCRG00010014446-TDRD15 | Restricted expression toward testis |
| 10_94764216 | 10 | 94764216 | 2.28E-06 | 94760000 | 94810000 | 0.1194 | ENSSCRG00010014977-IGFBP7 | This gene encodes a member of the insulin-like growth factor (IGF)-binding protein (IGFBP) family. |
| 1_115503459 | 1 | 115503459 | 4.65E-05 | 115460000 | 115510000 | 0.1346 | ENSSCRG00010001333 | no annotation available |
| 6_77897285 | 6 | 77897285 | 2.12E-04 | 77850000 | 77900000 | 0.1345 | ENSSCRG00010006791-NR2F1 | Enables sequence-specific DNA binding activity. Acts upstream of or within nervous system development and regulation of DNA-templated transcription. |
| 1_56723556 | 1 | 56723556 | 5.16E-05 | 56700000 | 56750000 | 0.1344 | STMN2-IL7 | Predicted to enable calcium-dependent protein binding activity and tubulin binding activity. Predicted to be involved in several processes, including cellular response to nerve growth factor stimulus; regulation of microtubule polymerization or depolymerization; and regulation of neuron projection development. |
| 6_69936150 | 6 | 69936150 | 1.77E-04 | 69930000 | 69980000 | 0.1343 | EDIL3-ENSSCRG00010005906 | Predicted to enable calcium ion binding activity. Acts upstream of or within positive regulation of cell-substrate adhesion. |
| 6_129132532 | 6 | 129132532 | 8.46E-05 | 129090000 | 129140000 | 0.0930 | ENSSCRG00010019700-PITX1 | Involved in embryonic hindlimb morphogenesis |
| 8_45837830 | 8 | 45837830 | 2.28E-06 | 45830000 | 45880000 | 0.1338 | DLX6-sem1 | Predicted to enable DNA-binding transcription factor activity, RNA polymerase II-specific and RNA polymerase II cis-regulatory region sequence-specific DNA binding activity. Acts upstream of or within several processes, including embryonic morphogenesis; positive regulation of epithelial cell proliferation; and roof of mouth development. |
| 8_45856024 | 8 | 45856024 | 1.63E-07 | 45830000 | 45880000 | 0.1338 | DLX6-sem1 | Predicted to enable DNA-binding transcription factor activity, RNA polymerase II-specific and RNA polymerase II cis-regulatory region sequence-specific DNA binding activity. Acts upstream of or within several processes, including embryonic morphogenesis; positive regulation of epithelial cell proliferation; and roof of mouth development. |
| 6_76500470 | 6 | 76500470 | 2.21E-06 | 76460000 | 76510000 | 0.1332 | ARRDC3-ENSSCRG00010006791 | Predicted to enable beta-3 adrenergic receptor binding activity. Involved in negative regulation of cold-induced thermogenesis. Acts upstream of or within several processes, including fat pad development; negative regulation of adenylate cyclase-activating adrenergic receptor signaling pathway; and negative regulation of locomotion involved in locomotory behavior. |
| 5_65498885 | 5 | 65498885 | 1.78E-04 | 65450000 | 65500000 | 0.1330 | ENSSCRG00010010958-ENSSCRG00010010968 | no annotation available |
| 6_77082960 | 6 | 77082960 | 1.03E-07 | 77040000 | 77090000 | 0.1327 | ENSSCRG00010006791-NR2F1 | Enables sequence-specific DNA binding activity. Acts upstream of or within nervous system development and regulation of DNA-templated transcription. |
| 5_55473538 | 5 | 55473538 | 1.90E-04 | 55470000 | 55520000 | 0.1325 | ENSSCRG00010010592-PCDH20 | This gene belongs to the protocadherin gene family, a subfamily of the cadherin superfamily. The encoded protein contains six extracellular cadherin domains, a transmembrane domain, and a cytoplasmic tail differing from those of the classical cadherins. The encoded protein may play a role in cell adhesion in the nervous system and has been shown to be specifically expressed in newly differentiated olfactory sensory neurons and their axons during development. |
| 5_55500626 | 5 | 55500626 | 1.90E-04 | 55470000 | 55520000 | 0.1325 | ENSSCRG00010010592-PCDH20 | This gene belongs to the protocadherin gene family, a subfamily of the cadherin superfamily. The encoded protein contains six extracellular cadherin domains, a transmembrane domain, and a cytoplasmic tail differing from those of the classical cadherins. The encoded protein may play a role in cell adhesion in the nervous system and has been shown to be specifically expressed in newly differentiated olfactory sensory neurons and their axons during development. |
| 1_56698722 | 1 | 56698722 | 3.90E-05 | 56690000 | 56740000 | 0.1322 | STMN2-IL7 | Predicted to enable calcium-dependent protein binding activity and tubulin binding activity. Predicted to be involved in several processes, including cellular response to nerve growth factor stimulus; regulation of microtubule polymerization or depolymerization; and regulation of neuron projection development. |
| 6_68629228 | 6 | 68629228 | 1.80E-05 | 68580000 | 68630000 | 0.1322 | XRCC4 | Involved in double-strand break repair via nonhomologous end joining; negative regulation of protection from non-homologous end joining at telomere; and telomeric DNA-containing double minutes formation. Acts upstream of or within several processes, including DNA metabolic process; hemopoiesis; and response to X-ray. |
| 11_121206857 | 11 | 121206857 | 1.12E-05 | 121160000 | 121210000 | 0.1238 | ENSSCRG00010021578-UBASH3B | Enables phosphoprotein binding activity and protein tyrosine phosphatase activity. Involved in regulation of osteoclast differentiation. Acts upstream of or within several processes, including collagen-activated tyrosine kinase receptor signaling pathway; negative regulation of bone resorption; and negative regulation of platelet aggregation. |
| 2_7325874 | 2 | 7325874 | 3.68E-04 | 7310000 | 7360000 | 0.1320 | DOK5 | Acts upstream of or within cell surface receptor protein tyrosine kinase signaling pathway; neuron differentiation; and positive regulation of MAPK cascade. |
| 8_54586038 | 8 | 54586038 | 1.15E-05 | 54540000 | 54590000 | 0.1312 | DMTF1 | Predicted to enable DNA-binding transcription factor activity, RNA polymerase II-specific and RNA polymerase II cis-regulatory region sequence-specific DNA binding activity. Predicted to be involved in regulation of transcription by RNA polymerase II. |
| 6_74370184 | 6 | 74370184 | 6.11E-06 | 74330000 | 74380000 | 0.1312 | MEF2C-ENSSCRG00010006300 | Enables several functions, including DNA-binding transcription activator activity, RNA polymerase II-specific; HMG box domain binding activity; and histone deacetylase binding activity. Involved in several processes, including heart development; modulation of chemical synaptic transmission; and positive regulation of cell differentiation. |
| 6_115720881 | 6 | 115720881 | 1.16E-05 | 115690000 | 115740000 | 0.1312 | CSNK1G3 | Predicted to enable protein serine/threonine kinase activity. Predicted to be involved in endocytosis; positive regulation of canonical Wnt signaling pathway; and signal transduction. |
| 11_121278197 | 11 | 121278197 | 2.23E-04 | 121230000 | 121280000 | 0.1104 | ENSSCRG00010021578-UBASH3B | Enables phosphoprotein binding activity and protein tyrosine phosphatase activity. Involved in regulation of osteoclast differentiation. Acts upstream of or within several processes, including collagen-activated tyrosine kinase receptor signaling pathway; negative regulation of bone resorption; and negative regulation of platelet aggregation. |
| 9_9866296 | 9 | 9866296 | 1.01E-04 | 9860000 | 9910000 | 0.0956 | ENSSCRG00010021705-ZIC1 | This gene encodes a member of the ZIC family of C2H2-type zinc finger proteins. |
| 7_70391386 | 7 | 70391386 | 1.08E-05 | 70350000 | 70400000 | 0.1082 | EPHA7-ENSSCRG00010014335 | Enables chemorepellent activity; growth factor binding activity; and transmembrane signaling receptor activity. |
| 5_32896717 | 5 | 32896717 | 2.18E-04 | 32860000 | 32910000 | 0.1307 | ENSSCRG00010004959 | no annotation available |
| 5_33967086 | 5 | 33967086 | 2.93E-04 | 33960000 | 34010000 | 0.1303 | TRPC4 | Enables inositol 1,4,5 trisphosphate binding activity. Acts upstream of or within gamma-aminobutyric acid secretion and oligodendrocyte differentiation. |
| 1_168624298 | 1 | 168624298 | 3.11E-04 | 168590000 | 168640000 | 0.1301 | EPS15 | This gene encodes a protein that is part of the EGFR pathway. |
| 5_134618494 | 5 | 134618494 | 2.98E-04 | 134580000 | 134630000 | 0.1300 | CCSER2 | Enables microtubule binding activity. Acts upstream of or within microtubule bundle formation. |
| 6_67227141 | 6 | 67227141 | 1.82E-04 | 67200000 | 67250000 | 0.1299 | SSBP2 | Predicted to enable single-stranded DNA binding activity. Predicted to be involved in positive regulation of transcription by RNA polymerase II. |
| 6_67238840 | 6 | 67238840 | 3.75E-05 | 67200000 | 67250000 | 0.1299 | SSBP2 | Predicted to enable single-stranded DNA binding activity. Predicted to be involved in positive regulation of transcription by RNA polymerase II. |
| 6_130772429 | 6 | 130772429 | 8.64E-06 | 130770000 | 130820000 | 0.1161 | FAF2 | Predicted to enable several functions, including enzyme binding activity; lipase inhibitor activity; and ubiquitin binding activity. |
| 14_59741497 | 14 | 59741497 | 3.68E-04 | 59700000 | 59750000 | 0.1287 | EEF1A1-HMGB3 | Enables calmodulin binding activity. Predicted to be involved in cellular response to epidermal growth factor stimulus; positive regulation by host of viral genome replication; and translational elongation. |
| 9_128596628 | 9 | 128596628 | 2.84E-04 | 128590000 | 128640000 | 0.1286 | ENSSCRG00010009278 | no annotation available |
| 9_128603401 | 9 | 128603401 | 1.33E-14 | 128590000 | 128640000 | 0.1286 | ENSSCRG00010009278 | no annotation available |
| 9_128610627 | 9 | 128610627 | 2.39E-05 | 128590000 | 128640000 | 0.1286 | ENSSCRG00010009278 | no annotation available |
| 9_128616945 | 9 | 128616945 | 5.59E-17 | 128590000 | 128640000 | 0.1286 | ENSSCRG00010009278 | no annotation available |
| 15_71057676 | 15 | 71057676 | 6.30E-07 | 71040000 | 71090000 | 0.1285 | CDH7 | This gene encodes a member of the cadherin family of calcium-dependent glycoproteins that mediate cell adhesion and regulate many morphogenetic events during development. |
| 6_115745832 | 6 | 115745832 | 1.04E-05 | 115700000 | 115750000 | 0.1283 | CSNK1G3 | Predicted to enable protein serine/threonine kinase activity. Predicted to be involved in endocytosis; positive regulation of canonical Wnt signaling pathway; and signal transduction. |
| 5_46840053 | 5 | 46840053 | 3.76E-04 | 46840000 | 46890000 | 0.1282 | VWA8 | Enables ATP hydrolysis activity. |
| 6_130784418 | 6 | 130784418 | 2.00E-05 | 130770000 | 130820000 | 0.1161 | FAF2 | Predicted to enable several functions, including enzyme binding activity; lipase inhibitor activity; and ubiquitin binding activity. |
| 6_59513332 | 6 | 59513332 | 1.04E-04 | 59510000 | 59560000 | 0.1100 | FAM169A | Is expressed in cerebellum external granule cell layer; retina inner nuclear layer; and retina outer nuclear layer. |
| 8_83272032 | 8 | 83272032 | 2.87E-04 | 83270000 | 83320000 | 0.0941 | FAM221A | Ubiquitous expression in testis adult |
| 1_168689948 | 1 | 168689948 | 3.60E-04 | 168670000 | 168720000 | 0.1001 | Fam60a | Involved in negative regulation of cell differentiation and positive regulation of cell population proliferation. |
| 6_76763424 | 6 | 76763424 | 4.83E-06 | 76740000 | 76790000 | 0.1271 | ENSSCRG00010006791-NR2F1 | Enables sequence-specific DNA binding activity. Acts upstream of or within nervous system development and regulation of DNA-templated transcription. |
| 6_69737727 | 6 | 69737727 | 2.27E-04 | 69710000 | 69760000 | 0.1270 | EDIL3 | Predicted to enable calcium ion binding activity. Acts upstream of or within positive regulation of cell-substrate adhesion. |
| 6_69758394 | 6 | 69758394 | 2.65E-08 | 69710000 | 69760000 | 0.1270 | EDIL3 | Predicted to enable calcium ion binding activity. Acts upstream of or within positive regulation of cell-substrate adhesion. |
| 6_75540391 | 6 | 75540391 | 1.59E-04 | 75510000 | 75560000 | 0.1268 | ADGRV1 | Enables several functions, including G-protein alpha-subunit binding activity; adenylate cyclase inhibitor activity; and myosin binding activity. Involved in several processes, including negative regulation of adenylate cyclase activity; positive regulation of bone mineralization; and self proteolysis. Acts upstream of or within several processes, including detection of mechanical stimulus involved in sensory perception of sound; inner ear receptor cell stereocilium organization; and positive regulation of cAMP/PKA signal transduction. |
| 5_101690622 | 5 | 101690622 | 1.91E-09 | 101690000 | 101740000 | 0.1264 | C10orf71 | Involved in positive regulation of calcineurin-NFAT signaling cascade. |
| 8_64168930 | 8 | 64168930 | 7.96E-05 | 64160000 | 64210000 | 0.1203 | FBXL13 | Predicted to be involved in SCF-dependent proteasomal ubiquitin-dependent protein catabolic process. |
| 6_59235269 | 6 | 59235269 | 3.72E-04 | 59210000 | 59260000 | 0.1263 | ANKRD31 | Involved in homologous chromosome pairing at meiosis; meiotic DNA double-strand break formation involved in reciprocal meiotic recombination; and positive regulation of meiotic DNA double-strand break formation. |
| 6_59251468 | 6 | 59251468 | 8.64E-07 | 59210000 | 59260000 | 0.1263 | ANKRD31 | Involved in homologous chromosome pairing at meiosis; meiotic DNA double-strand break formation involved in reciprocal meiotic recombination; and positive regulation of meiotic DNA double-strand break formation. |
| 3_31683877 | 3 | 31683877 | 4.79E-05 | 31660000 | 31710000 | 0.1262 | C17orf67 | Predicted to be located in extracellular region. |
| 3_31703497 | 3 | 31703497 | 8.44E-05 | 31660000 | 31710000 | 0.1262 | C17orf67 | Predicted to be located in extracellular region. |
| 6_59998808 | 6 | 59998808 | 3.50E-05 | 59960000 | 60010000 | 0.1258 | ENC1-ARHGEF28 | Predicted to enable actin binding activity. Predicted to be involved in several processes, including negative regulation of translation; positive regulation of neuron projection development; and proteasomal ubiquitin-independent protein catabolic process. |
| 5_34793614 | 5 | 34793614 | 2.11E-04 | 34750000 | 34800000 | 0.1056 | FREM2 | Predicted to enable metal ion binding activity. Involved in eye development. |
| 12_50420481 | 12 | 50420481 | 3.85E-05 | 50410000 | 50460000 | 0.0972 | FRMD4A | Enables protein-macromolecule adaptor activity. Involved in negative regulation of protein secretion. |
| 6_76804922 | 6 | 76804922 | 3.02E-06 | 76760000 | 76810000 | 0.1248 | ENSSCRG00010006791-NR2F1 | Enables sequence-specific DNA binding activity. Acts upstream of or within nervous system development and regulation of DNA-templated transcription. |
| 6_76807690 | 6 | 76807690 | 3.26E-04 | 76760000 | 76810000 | 0.1248 | ENSSCRG00010006791-NR2F1 | Enables sequence-specific DNA binding activity. Acts upstream of or within nervous system development and regulation of DNA-templated transcription. |
| 4_15356695 | 4 | 15356695 | 1.25E-04 | 15320000 | 15370000 | 0.0942 | GFRA2 | Mice lacking this protein are viable and fertile but display growth retardation attributed to impaired salivary and pancreatic secretion and innervation deficits in the intestinal tract. |
| 5_122185465 | 5 | 122185465 | 6.57E-06 | 122180000 | 122230000 | 0.1243 | ENSSCRG00010016030 | no annotation available |
| 6_74732332 | 6 | 74732332 | 2.21E-06 | 74720000 | 74770000 | 0.1242 | ENSSCRG00010006300 | no annotation available |
| 6_74758048 | 6 | 74758048 | 9.51E-06 | 74720000 | 74770000 | 0.1242 | ENSSCRG00010006300 | no annotation available |
| 6_68965491 | 6 | 68965491 | 1.65E-04 | 68920000 | 68970000 | 0.1240 | VCAN | Enables protein phosphatase binding activity. Involved in ureteric bud development. |
| 6_79350596 | 6 | 79350596 | 4.16E-08 | 79310000 | 79360000 | 0.1239 | MCTP1 | Predicted to enable calcium ion binding activity. Predicted to be involved in several processes, including negative regulation of endocytosis; negative regulation of response to oxidative stress; and regulation of neurotransmitter secretion |
| 5_57677781 | 5 | 57677781 | 2.43E-04 | 57660000 | 57710000 | 0.1238 | ENSSCRG00010010649-ENSSCRG00010010667 | no annotation available |
| 5_57704040 | 5 | 57704040 | 8.56E-08 | 57660000 | 57710000 | 0.1238 | ENSSCRG00010010649-ENSSCRG00010010667 | no annotation available |
| 6_96786716 | 6 | 96786716 | 6.22E-05 | 96750000 | 96800000 | 0.0932 | GFRA3 | This gene encodes a cell surface glycoprotein and member of the glial cell line-derived neurotrophic receptor (GDNFR) family of proteins. |
| 11_133850773 | 11 | 133850773 | 1.25E-05 | 133850000 | 133900000 | 0.0943 | GLB1L3 | no annotation available |
| 6_77440120 | 6 | 77440120 | 7.34E-05 | 77440000 | 77490000 | 0.1232 | ENSSCRG00010006791-NR2F1 | Enables sequence-specific DNA binding activity. Acts upstream of or within nervous system development and regulation of DNA-templated transcription. |
| 2_8437954 | 2 | 8437954 | 1.81E-05 | 8420000 | 8470000 | 0.1230 | TSHZ2 | Predicted to enable DNA binding activity and DNA-binding transcription factor activity, RNA polymerase II-specific. Acts upstream of or within regulation of gene expression. |
| 2_8452473 | 2 | 8452473 | 1.94E-04 | 8420000 | 8470000 | 0.1230 | TSHZ2 | Predicted to enable DNA binding activity and DNA-binding transcription factor activity, RNA polymerase II-specific. Acts upstream of or within regulation of gene expression. |
| 2_8466299 | 2 | 8466299 | 5.25E-06 | 8420000 | 8470000 | 0.1230 | TSHZ2 | Predicted to enable DNA binding activity and DNA-binding transcription factor activity, RNA polymerase II-specific. Acts upstream of or within regulation of gene expression. |
| 6_59202286 | 6 | 59202286 | 2.02E-04 | 59200000 | 59250000 | 0.1228 | ANKRD31 | Involved in homologous chromosome pairing at meiosis; meiotic DNA double-strand break formation involved in reciprocal meiotic recombination; and positive regulation of meiotic DNA double-strand break formation. |
| 6_77730743 | 6 | 77730743 | 8.97E-06 | 77720000 | 77770000 | 0.1227 | ENSSCRG00010006791-NR2F1 | Enables sequence-specific DNA binding activity. Acts upstream of or within nervous system development and regulation of DNA-templated transcription. |
| 6_79362607 | 6 | 79362607 | 3.49E-06 | 79320000 | 79370000 | 0.1226 | MCTP1 | Predicted to enable calcium ion binding activity. Predicted to be involved in several processes, including negative regulation of endocytosis; negative regulation of response to oxidative stress; and regulation of neurotransmitter secretion |
| 6_58478946 | 6 | 58478946 | 1.35E-04 | 58450000 | 58500000 | 0.1221 | SV2C-POC5 | Predicted to enable transmembrane transporter activity. Involved in regulation of synaptic vesicle exocytosis. |
| 6_58485772 | 6 | 58485772 | 2.34E-06 | 58450000 | 58500000 | 0.1221 | SV2C-POC5 | Predicted to enable transmembrane transporter activity. Involved in regulation of synaptic vesicle exocytosis. |
| 6_58494033 | 6 | 58494033 | 1.58E-06 | 58450000 | 58500000 | 0.1221 | SV2C-POC5 | Predicted to enable transmembrane transporter activity. Involved in regulation of synaptic vesicle exocytosis. |
| 8_69854536 | 8 | 69854536 | 2.88E-04 | 69820000 | 69870000 | 0.1219 | ENSSCRG00010022813-ENSSCRG00010022824 | no annotation available |
| 6_80300078 | 6 | 80300078 | 6.67E-06 | 80290000 | 80340000 | 0.1309 | GLRX | This gene encodes a member of the glutaredoxin family. |
| 9_128389297 | 9 | 128389297 | 3.78E-05 | 128380000 | 128430000 | 0.1218 | ENSSCRG00010009265 | no annotation available |
| 9_128393525 | 9 | 128393525 | 8.99E-06 | 128380000 | 128430000 | 0.1218 | ENSSCRG00010009265 | no annotation available |
| 9_128420663 | 9 | 128420663 | 3.43E-04 | 128380000 | 128430000 | 0.1218 | ENSSCRG00010009265 | no annotation available |
| 6_76409878 | 6 | 76409878 | 2.21E-06 | 76400000 | 76450000 | 0.1217 | ARRDC3-ENSSCRG00010006791 | Predicted to enable beta-3 adrenergic receptor binding activity. Involved in negative regulation of cold-induced thermogenesis. Acts upstream of or within several processes, including fat pad development; negative regulation of adenylate cyclase-activating adrenergic receptor signaling pathway; and negative regulation of locomotion involved in locomotory behavior. |
| 6_75780952 | 6 | 75780952 | 3.22E-04 | 75740000 | 75790000 | 0.1216 | ADGRV1 | Enables several functions, including G-protein alpha-subunit binding activity; adenylate cyclase inhibitor activity; and myosin binding activity. Involved in several processes, including negative regulation of adenylate cyclase activity; positive regulation of bone mineralization; and self proteolysis. Acts upstream of or within several processes, including detection of mechanical stimulus involved in sensory perception of sound; inner ear receptor cell stereocilium organization; and positive regulation of cAMP/PKA signal transduction. |
| 6_74719153 | 6 | 74719153 | 1.98E-04 | 74710000 | 74760000 | 0.1213 | ENSSCRG00010006300 | no annotation available |
| 5_117470945 | 5 | 117470945 | 7.56E-06 | 117470000 | 117520000 | 0.1213 | REEP3-ENSSCRG00010009059 | Predicted to enable microtubule binding activity. Predicted to be involved in endoplasmic reticulum tubular network organization and mitotic nuclear membrane reassembly. |
| 6_67189501 | 6 | 67189501 | 2.87E-04 | 67180000 | 67230000 | 0.1210 | SSBP2 | Predicted to enable single-stranded DNA binding activity. Predicted to be involved in positive regulation of transcription by RNA polymerase II. |
| 6_80358519 | 6 | 80358519 | 9.43E-06 | 80310000 | 80360000 | 0.1275 | GLRX | This gene encodes a member of the glutaredoxin family. |
| 5_59849570 | 5 | 59849570 | 5.01E-06 | 59800000 | 59850000 | 0.1203 | ENSSCRG00010010698-PCDH9 | This gene encodes a member of the protocadherin family, and cadherin superfamily, of transmembrane proteins containing cadherin domains. These proteins mediate cell adhesion in neural tissues in the presence of calcium. |
| 6_58500025 | 6 | 58500025 | 1.21E-05 | 58460000 | 58510000 | 0.1200 | SV2C-POC5 | Predicted to enable transmembrane transporter activity. Involved in regulation of synaptic vesicle exocytosis. |
| 6_58502890 | 6 | 58502890 | 3.38E-04 | 58460000 | 58510000 | 0.1200 | SV2C-POC5 | Predicted to enable transmembrane transporter activity. Involved in regulation of synaptic vesicle exocytosis. |
| 2_6136255 | 2 | 6136255 | 2.35E-04 | 6130000 | 6180000 | 0.1198 | MC3R-CBLN4 | This gene maps to the same region as the locus for benign neonatal epilepsy. Mice deficient for this gene have increased fat mass despite decreased food intake, suggesting a role for this gene product in the regulation of energy homeostasis. |
| 6_82670348 | 6 | 82670348 | 2.07E-05 | 82670000 | 82720000 | 0.1197 | CHIA-RGMB | Enables chitin binding activity and chitinase activity. Involved in chitin catabolic process. |
| 6_67176444 | 6 | 67176444 | 3.62E-05 | 67160000 | 67210000 | 0.1195 | SSBP2 | Predicted to enable single-stranded DNA binding activity. Predicted to be involved in positive regulation of transcription by RNA polymerase II. |
| 11_133874389 | 11 | 133874389 | 3.25E-04 | 133850000 | 133900000 | 0.0943 | Gm1110 | Predicted to enable beta-galactosidase activity. |
| 10_32778988 | 10 | 32778988 | 1.12E-04 | 32740000 | 32790000 | 0.0931 | GRIA2-ENSSCRG00010015867 | Glutamate receptors are the predominant excitatory neurotransmitter receptors in the mammalian brain and are activated in a variety of normal neurophysiologic processes. |
| 8_26377431 | 8 | 26377431 | 5.07E-05 | 26370000 | 26420000 | 0.0995 | GRM8 | L-glutamate is the major excitatory neurotransmitter in the central nervous system and activates both ionotropic and metabotropic glutamate receptors. |
| 8_26404817 | 8 | 26404817 | 1.79E-04 | 26370000 | 26420000 | 0.0995 | GRM8 | L-glutamate is the major excitatory neurotransmitter in the central nervous system and activates both ionotropic and metabotropic glutamate receptors. |
| 9_128565047 | 9 | 128565047 | 3.68E-22 | 128560000 | 128610000 | 0.1182 | ENSSCRG00010009270-ENSSCRG00010009278 | no annotation available |
| 3_31650440 | 3 | 31650440 | 1.74E-04 | 31650000 | 31700000 | 0.1182 | DGKE | Predicted to enable ATP-dependent diacylglycerol kinase activity. Involved in modulation of chemical synaptic transmission and phosphatidylinositol biosynthetic process. |
| 3_31656322 | 3 | 31656322 | 6.21E-05 | 31650000 | 31700000 | 0.1182 | DGKE | Predicted to enable ATP-dependent diacylglycerol kinase activity. Involved in modulation of chemical synaptic transmission and phosphatidylinositol biosynthetic process. |
| 8_26361902 | 8 | 26361902 | 5.59E-06 | 26360000 | 26410000 | 0.0976 | GRM8 | L-glutamate is the major excitatory neurotransmitter in the central nervous system and activates both ionotropic and metabotropic glutamate receptors. |
| 6_76816604 | 6 | 76816604 | 1.04E-05 | 76780000 | 76830000 | 0.1180 | ENSSCRG00010006791-NR2F1 | Enables sequence-specific DNA binding activity. Acts upstream of or within nervous system development and regulation of DNA-templated transcription. |
| 6_59566240 | 6 | 59566240 | 2.64E-04 | 59520000 | 59570000 | 0.1179 | ENSSCRG00010012776 | no annotation available |
| 6_69530878 | 6 | 69530878 | 1.87E-07 | 69490000 | 69540000 | 0.1174 | EDIL3 | Predicted to enable calcium ion binding activity. Acts upstream of or within positive regulation of cell-substrate adhesion. |
| 5_32956486 | 5 | 32956486 | 6.56E-06 | 32950000 | 33000000 | 0.1174 | ENSSCRG00010004970 | no annotation available |
| 5_134685214 | 5 | 134685214 | 5.54E-05 | 134680000 | 134730000 | 0.1172 | CCSER2 | Enables microtubule binding activity. Acts upstream of or within microtubule bundle formation. |
| 6_69145930 | 6 | 69145930 | 2.51E-04 | 69100000 | 69150000 | 0.1143 | HAPLN1 | Predicted to be involved in nervous system development; positive regulation of neuroblast proliferation; and skeletal system development. |
| 6_69423099 | 6 | 69423099 | 3.57E-04 | 69410000 | 69460000 | 0.1170 | ENSSCRG00010005903 | no annotation available |
| 6_74799972 | 6 | 74799972 | 1.17E-04 | 74750000 | 74800000 | 0.1169 | ENSSCRG00010006300 | no annotation available |
| 6_74945100 | 6 | 74945100 | 7.62E-05 | 74900000 | 74950000 | 0.1169 | ENSSCRG00010006300-CETN3 | Enables G-protein beta/gamma-subunit complex binding activity and microtubule binding activity. Predicted to be involved in microtubule cytoskeleton organization. |
| 6_74945979 | 6 | 74945979 | 1.42E-04 | 74900000 | 74950000 | 0.1169 | ENSSCRG00010006300-CETN3 | Enables G-protein beta/gamma-subunit complex binding activity and microtubule binding activity. Predicted to be involved in microtubule cytoskeleton organization. |
| 14_41877175 | 14 | 41877175 | 3.49E-05 | 41850000 | 41900000 | 0.1168 | ENSSCRG00010014982 | no annotation available |
| 14_41889181 | 14 | 41889181 | 3.49E-05 | 41850000 | 41900000 | 0.1168 | ENSSCRG00010014982 | no annotation available |
| 2_7063310 | 2 | 7063310 | 4.41E-06 | 7060000 | 7110000 | 0.1165 | ENSSCRG00010005886-DOK5 | Acts upstream of or within cell surface receptor protein tyrosine kinase signaling pathway; neuron differentiation; and positive regulation of MAPK cascade. |
| 2_7086663 | 2 | 7086663 | 6.22E-07 | 7060000 | 7110000 | 0.1165 | ENSSCRG00010005886-DOK5 | Acts upstream of or within cell surface receptor protein tyrosine kinase signaling pathway; neuron differentiation; and positive regulation of MAPK cascade. |
| 6_69307026 | 6 | 69307026 | 1.30E-05 | 69300000 | 69350000 | 0.1079 | HAPLN1-EDIL3 | Predicted to be involved in nervous system development; positive regulation of neuroblast proliferation; and skeletal system development. |
| 1_188356411 | 1 | 188356411 | 9.01E-09 | 188330000 | 188380000 | 0.1164 | TMEM200B | Ubiquitous expression in ovary adult |
| 1_188371777 | 1 | 188371777 | 1.82E-04 | 188330000 | 188380000 | 0.1164 | TMEM200B | Ubiquitous expression in ovary adult |
| 6_69314337 | 6 | 69314337 | 2.17E-04 | 69300000 | 69350000 | 0.1079 | HAPLN1-EDIL3 | Predicted to be involved in nervous system development; positive regulation of neuroblast proliferation; and skeletal system development. |
| 9_128434156 | 9 | 128434156 | 6.62E-07 | 128390000 | 128440000 | 0.1164 | ENSSCRG00010009265 | no annotation available |
| 6_76512540 | 6 | 76512540 | 2.80E-06 | 76470000 | 76520000 | 0.1164 | ARRDC3-ENSSCRG00010006791 | Predicted to enable beta-3 adrenergic receptor binding activity. Involved in negative regulation of cold-induced thermogenesis. Acts upstream of or within several processes, including fat pad development; negative regulation of adenylate cyclase-activating adrenergic receptor signaling pathway; and negative regulation of locomotion involved in locomotory behavior. |
| 10_70446259 | 10 | 70446259 | 3.02E-04 | 70420000 | 70470000 | 0.1161 | ARHGAP24 | Enables GTPase activator activity. Acts upstream of or within several processes, including activation of GTPase activity; negative regulation of Rac protein signal transduction; and negative regulation of ruffle assembly. |
| 6_59712307 | 6 | 59712307 | 1.48E-05 | 59700000 | 59750000 | 0.1280 | HEXB | Enables beta-N-acetylhexosaminidase activity and identical protein binding activity. |
| 6_59694581 | 6 | 59694581 | 3.30E-04 | 59690000 | 59740000 | 0.1276 | HEXB | Enables beta-N-acetylhexosaminidase activity and identical protein binding activity. |
| 6_78018501 | 6 | 78018501 | 1.21E-04 | 78010000 | 78060000 | 0.1161 | ENSSCRG00010006791-NR2F1 | Enables sequence-specific DNA binding activity. Acts upstream of or within nervous system development and regulation of DNA-templated transcription. |
| 6_78032715 | 6 | 78032715 | 1.27E-04 | 78010000 | 78060000 | 0.1161 | ENSSCRG00010006791-NR2F1 | Enables sequence-specific DNA binding activity. Acts upstream of or within nervous system development and regulation of DNA-templated transcription. |
| 6_78044065 | 6 | 78044065 | 2.68E-05 | 78010000 | 78060000 | 0.1161 | ENSSCRG00010006791-NR2F1 | Enables sequence-specific DNA binding activity. Acts upstream of or within nervous system development and regulation of DNA-templated transcription. |
| 6_78056369 | 6 | 78056369 | 5.93E-06 | 78010000 | 78060000 | 0.1161 | ENSSCRG00010006791-NR2F1 | Enables sequence-specific DNA binding activity. Acts upstream of or within nervous system development and regulation of DNA-templated transcription. |
| 6_69909480 | 6 | 69909480 | 1.50E-04 | 69900000 | 69950000 | 0.1158 | EDIL3-ENSSCRG00010005906 | Predicted to enable calcium ion binding activity. Acts upstream of or within positive regulation of cell-substrate adhesion. |
| 6_77716659 | 6 | 77716659 | 1.52E-05 | 77710000 | 77760000 | 0.1156 | ENSSCRG00010006791-NR2F1 | Enables sequence-specific DNA binding activity. Acts upstream of or within nervous system development and regulation of DNA-templated transcription. |
| 2_8480824 | 2 | 8480824 | 3.62E-04 | 8440000 | 8490000 | 0.1153 | TSHZ2 | Predicted to enable DNA binding activity and DNA-binding transcription factor activity, RNA polymerase II-specific. Acts upstream of or within regulation of gene expression. |
| 2_8480858 | 2 | 8480858 | 1.05E-05 | 8440000 | 8490000 | 0.1153 | TSHZ2 | Predicted to enable DNA binding activity and DNA-binding transcription factor activity, RNA polymerase II-specific. Acts upstream of or within regulation of gene expression. |
| 6_115668028 | 6 | 115668028 | 6.10E-05 | 115660000 | 115710000 | 0.1263 | HNRNPA1 | Predicted to enable identical protein binding activity; nucleic acid binding activity; and protein domain specific binding activity. |
| 1_122930887 | 1 | 122930887 | 2.40E-04 | 122920000 | 122970000 | 0.1140 | ENSSCRG00010002167-ENSSCRG00010002182 | no annotation available |
| 2_7650109 | 2 | 7650109 | 5.79E-06 | 7650000 | 7700000 | 0.1140 | DOK5-PFDN4 | Acts upstream of or within cell surface receptor protein tyrosine kinase signaling pathway; neuron differentiation; and positive regulation of MAPK cascade. |
| 2_7653384 | 2 | 7653384 | 8.28E-05 | 7650000 | 7700000 | 0.1140 | DOK5-PFDN4 | Acts upstream of or within cell surface receptor protein tyrosine kinase signaling pathway; neuron differentiation; and positive regulation of MAPK cascade. |
| 2_8381908 | 2 | 8381908 | 3.96E-05 | 8340000 | 8390000 | 0.1139 | ENSSCRG00010006119 | no annotation available |
| 2_8382834 | 2 | 8382834 | 1.42E-18 | 8340000 | 8390000 | 0.1139 | ENSSCRG00010006119 | no annotation available |
| 14_57811870 | 14 | 57811870 | 4.21E-05 | 57790000 | 57840000 | 0.1139 | TYRP1-EEF1A1 | Enables protein homodimerization activity. Involved in positive regulation of melanin biosynthetic process. Acts upstream of or within several processes, including acetoacetic acid metabolic process; melanocyte differentiation; and melanosome organization. |
| 6_78067448 | 6 | 78067448 | 1.73E-04 | 78020000 | 78070000 | 0.1137 | ENSSCRG00010006791-NR2F1 | Enables sequence-specific DNA binding activity. Acts upstream of or within nervous system development and regulation of DNA-templated transcription. |
| 8_45812744 | 8 | 45812744 | 3.05E-05 | 45810000 | 45860000 | 0.1135 | DLX6 | Predicted to enable DNA-binding transcription factor activity, RNA polymerase II-specific and RNA polymerase II cis-regulatory region sequence-specific DNA binding activity. Acts upstream of or within several processes, including embryonic morphogenesis; positive regulation of epithelial cell proliferation; and roof of mouth development. |
| 6_131095801 | 6 | 131095801 | 1.37E-04 | 131090000 | 131140000 | 0.1134 | CPLX2 | Predicted to enable calcium-dependent protein binding activity and syntaxin-1 binding activity. Involved in positive regulation of synaptic plasticity and regulation of synaptic vesicle fusion to presynaptic active zone membrane. |
| 6_131111221 | 6 | 131111221 | 1.42E-04 | 131090000 | 131140000 | 0.1134 | CPLX2 | Predicted to enable calcium-dependent protein binding activity and syntaxin-1 binding activity. Involved in positive regulation of synaptic plasticity and regulation of synaptic vesicle fusion to presynaptic active zone membrane. |
| 6_131115069 | 6 | 131115069 | 1.92E-05 | 131090000 | 131140000 | 0.1134 | CPLX2 | Predicted to enable calcium-dependent protein binding activity and syntaxin-1 binding activity. Involved in positive regulation of synaptic plasticity and regulation of synaptic vesicle fusion to presynaptic active zone membrane. |
| 6_131129427 | 6 | 131129427 | 1.15E-04 | 131090000 | 131140000 | 0.1134 | CPLX2 | Predicted to enable calcium-dependent protein binding activity and syntaxin-1 binding activity. Involved in positive regulation of synaptic plasticity and regulation of synaptic vesicle fusion to presynaptic active zone membrane. |
| 1_115226000 | 1 | 115226000 | 4.14E-08 | 115220000 | 115270000 | 0.1130 | ENSSCRG00010001324-ENSSCRG00010001333 | no annotation available |
| 1_114439371 | 1 | 114439371 | 1.80E-05 | 114430000 | 114480000 | 0.1128 | ENSSCRG00010001311-ENSSCRG00010001324 | no annotation available |
| 6_117231777 | 6 | 117231777 | 4.89E-05 | 117190000 | 117240000 | 0.1128 | ENSSCRG00010008847 | no annotation available |
| 6_72328205 | 6 | 72328205 | 2.42E-06 | 72320000 | 72370000 | 0.1127 | ENSSCRG00010005937-ENSSCRG00010005947 | no annotation available |
| 6_72346779 | 6 | 72346779 | 5.21E-05 | 72320000 | 72370000 | 0.1127 | ENSSCRG00010005937-ENSSCRG00010005947 | no annotation available |
| 6_115648698 | 6 | 115648698 | 2.36E-04 | 115640000 | 115690000 | 0.1084 | HNRNPA1 | Predicted to enable identical protein binding activity; nucleic acid binding activity; and protein domain specific binding activity. |
| 6_65067145 | 6 | 65067145 | 2.58E-05 | 65020000 | 65070000 | 0.0914 | HOMER1 | Predicted to enable several functions, including scaffold protein binding activity; transmembrane transporter binding activity; and type 5 metabotropic glutamate receptor binding activity. |
| 5_14567669 | 5 | 14567669 | 3.12E-04 | 14560000 | 14610000 | 0.0937 | HS6ST3 | Enables heparan sulfate 6-O-sulfotransferase activity. |
| 10_71037581 | 10 | 71037581 | 2.21E-04 | 71030000 | 71080000 | 0.1126 | ARHGAP24-WDFY3 | Enables GTPase activator activity. Acts upstream of or within several processes, including activation of GTPase activity; negative regulation of Rac protein signal transduction; and negative regulation of ruffle assembly. |
| 8_13039636 | 8 | 13039636 | 1.99E-05 | 13030000 | 13080000 | 0.1126 | TRBV19 | Predicted to be involved in cell surface receptor signaling pathway. |
| 5_90720134 | 5 | 90720134 | 1.07E-06 | 90690000 | 90740000 | 0.1124 | ENSSCRG00010001803 | no annotation available |
| 14_49452324 | 14 | 49452324 | 7.54E-05 | 49410000 | 49460000 | 0.0998 | IFNE | Predicted to enable cytokine activity and type I interferon receptor binding activity. |
| 6_58446361 | 6 | 58446361 | 8.30E-07 | 58440000 | 58490000 | 0.1121 | SV2C-POC5 | Predicted to enable transmembrane transporter activity. Involved in regulation of synaptic vesicle exocytosis. |
| 6_75315996 | 6 | 75315996 | 2.23E-04 | 75310000 | 75360000 | 0.1121 | CETN3 | Enables G-protein beta/gamma-subunit complex binding activity and microtubule binding activity. Predicted to be involved in microtubule cytoskeleton organization. |
| 6_74815610 | 6 | 74815610 | 1.68E-04 | 74770000 | 74820000 | 0.1120 | ENSSCRG00010006300-CETN3 | Enables G-protein beta/gamma-subunit complex binding activity and microtubule binding activity. Predicted to be involved in microtubule cytoskeleton organization. |
| 6_76029787 | 6 | 76029787 | 3.00E-05 | 75990000 | 76040000 | 0.1120 | ENSSCRG00010006708 | no annotation available |
| 1_101913898 | 1 | 101913898 | 1.82E-04 | 101870000 | 101920000 | 0.1119 | ENSSCRG00010003117 | no annotation available |
| 8_113229496 | 8 | 113229496 | 1.58E-04 | 113180000 | 113230000 | 0.1118 | ENSSCRG00010011910 | no annotation available |
| 8_113207024 | 8 | 113207024 | 2.23E-05 | 113180000 | 113230000 | 0.1118 | VOPP1-ENSSCRG00010011910 | Predicted to enable enzyme binding activity. |
| 8_113214972 | 8 | 113214972 | 3.50E-04 | 113180000 | 113230000 | 0.1118 | VOPP1-ENSSCRG00010011910 | Predicted to enable enzyme binding activity. |
| 8_83370953 | 8 | 83370953 | 1.86E-04 | 83330000 | 83380000 | 0.1116 | STK31 | Enables protein kinase activity. Acts upstream of or within protein phosphorylation |
| 6_58123240 | 6 | 58123240 | 9.96E-09 | 58100000 | 58150000 | 0.1056 | IQGAP2 | Predicted to enable several functions, including Arp2/3 complex binding activity; GTPase activator activity; and calmodulin binding activity. |
| 5_37371086 | 5 | 37371086 | 3.71E-07 | 37340000 | 37390000 | 0.1114 | WDFY2 | Predicted to enable metal ion binding activity. Involved in positive regulation of fat cell differentiation. |
| 6_69897605 | 6 | 69897605 | 3.52E-05 | 69880000 | 69930000 | 0.1114 | EDIL3-ENSSCRG00010005906 | Predicted to enable calcium ion binding activity. Acts upstream of or within positive regulation of cell-substrate adhesion. |
| 8_89151854 | 8 | 89151854 | 3.31E-05 | 89150000 | 89200000 | 0.1110 | ENSSCRG00010014097-ZNRF2 | Predicted to enable ubiquitin protein ligase activity. Predicted to be involved in proteasome-mediated ubiquitin-dependent protein catabolic process and protein K48-linked ubiquitination. |
| 9_128644428 | 9 | 128644428 | 1.90E-04 | 128600000 | 128650000 | 0.1110 | ENSSCRG00010009278 | no annotation available |
| 6_69010036 | 6 | 69010036 | 1.00E-06 | 69000000 | 69050000 | 0.1109 | VCAN | Enables protein phosphatase binding activity. Involved in ureteric bud development. |
| 6_69023219 | 6 | 69023219 | 1.17E-04 | 69000000 | 69050000 | 0.1109 | VCAN | Enables protein phosphatase binding activity. Involved in ureteric bud development. |
| 6_69026337 | 6 | 69026337 | 1.19E-04 | 69000000 | 69050000 | 0.1109 | VCAN | Enables protein phosphatase binding activity. Involved in ureteric bud development. |
| 6_65023024 | 6 | 65023024 | 6.22E-05 | 65010000 | 65060000 | 0.0944 | JMY | Acts both as a nuclear p53/TP53-cofactor and a cytoplasmic regulator of actin dynamics depending on conditions. |
| 6_75985191 | 6 | 75985191 | 2.23E-05 | 75970000 | 76020000 | 0.1108 | ADGRV1 | Enables several functions, including G-protein alpha-subunit binding activity; adenylate cyclase inhibitor activity; and myosin binding activity. Involved in several processes, including negative regulation of adenylate cyclase activity; positive regulation of bone mineralization; and self proteolysis. Acts upstream of or within several processes, including detection of mechanical stimulus involved in sensory perception of sound; inner ear receptor cell stereocilium organization; and positive regulation of cAMP/PKA signal transduction. |
| 6_131148685 | 6 | 131148685 | 1.33E-05 | 131100000 | 131150000 | 0.1108 | CPLX2-ENSSCRG00010023507 | Predicted to enable calcium-dependent protein binding activity and syntaxin-1 binding activity. Involved in positive regulation of synaptic plasticity and regulation of synaptic vesicle fusion to presynaptic active zone membrane. |
| 6_75708331 | 6 | 75708331 | 2.73E-04 | 75700000 | 75750000 | 0.1107 | ADGRV1 | Enables several functions, including G-protein alpha-subunit binding activity; adenylate cyclase inhibitor activity; and myosin binding activity. Involved in several processes, including negative regulation of adenylate cyclase activity; positive regulation of bone mineralization; and self proteolysis. Acts upstream of or within several processes, including detection of mechanical stimulus involved in sensory perception of sound; inner ear receptor cell stereocilium organization; and positive regulation of cAMP/PKA signal transduction. |
| 6_75719426 | 6 | 75719426 | 6.23E-05 | 75700000 | 75750000 | 0.1107 | ADGRV1 | Enables several functions, including G-protein alpha-subunit binding activity; adenylate cyclase inhibitor activity; and myosin binding activity. Involved in several processes, including negative regulation of adenylate cyclase activity; positive regulation of bone mineralization; and self proteolysis. Acts upstream of or within several processes, including detection of mechanical stimulus involved in sensory perception of sound; inner ear receptor cell stereocilium organization; and positive regulation of cAMP/PKA signal transduction. |
| 6_59159312 | 6 | 59159312 | 5.84E-05 | 59130000 | 59180000 | 0.1105 | ANKRD31 | Involved in homologous chromosome pairing at meiosis; meiotic DNA double-strand break formation involved in reciprocal meiotic recombination; and positive regulation of meiotic DNA double-strand break formation. |
| 6_59173536 | 6 | 59173536 | 1.99E-04 | 59130000 | 59180000 | 0.1105 | ANKRD31 | Involved in homologous chromosome pairing at meiosis; meiotic DNA double-strand break formation involved in reciprocal meiotic recombination; and positive regulation of meiotic DNA double-strand break formation. |
| 6_59175856 | 6 | 59175856 | 2.40E-04 | 59130000 | 59180000 | 0.1105 | ANKRD31 | Involved in homologous chromosome pairing at meiosis; meiotic DNA double-strand break formation involved in reciprocal meiotic recombination; and positive regulation of meiotic DNA double-strand break formation. |
| 8_45806870 | 8 | 45806870 | 7.06E-05 | 45800000 | 45850000 | 0.1105 | DLX6 | Predicted to enable DNA-binding transcription factor activity, RNA polymerase II-specific and RNA polymerase II cis-regulatory region sequence-specific DNA binding activity. Acts upstream of or within several processes, including embryonic morphogenesis; positive regulation of epithelial cell proliferation; and roof of mouth development. |
| 8_83313560 | 8 | 83313560 | 1.99E-04 | 83300000 | 83350000 | 0.1105 | STK31 | Enables protein kinase activity. Acts upstream of or within protein phosphorylation |
| 6_64949356 | 6 | 64949356 | 2.24E-04 | 64940000 | 64990000 | 0.0922 | JMY | Acts both as a nuclear p53/TP53-cofactor and a cytoplasmic regulator of actin dynamics depending on conditions. |
| 6_74698954 | 6 | 74698954 | 6.21E-05 | 74680000 | 74730000 | 0.1104 | ENSSCRG00010006300 | no annotation available |
| 5_114266984 | 5 | 114266984 | 4.41E-06 | 114260000 | 114310000 | 0.1101 | ARID5B | Predicted to enable transcription cis-regulatory region binding activity and transcription coactivator activity. Involved in adipose tissue development. Acts upstream of or within several processes, including cellular response to leukemia inhibitory factor; face morphogenesis; and gonad development. |
| 5_114293561 | 5 | 114293561 | 1.62E-07 | 114260000 | 114310000 | 0.1101 | ARID5B | Predicted to enable transcription cis-regulatory region binding activity and transcription coactivator activity. Involved in adipose tissue development. Acts upstream of or within several processes, including cellular response to leukemia inhibitory factor; face morphogenesis; and gonad development. |
| 6_77691045 | 6 | 77691045 | 2.25E-04 | 77690000 | 77740000 | 0.1101 | ENSSCRG00010006791-NR2F1 | Enables sequence-specific DNA binding activity. Acts upstream of or within nervous system development and regulation of DNA-templated transcription. |
| 1_115618201 | 1 | 115618201 | 1.27E-04 | 115610000 | 115660000 | 0.1100 | ENSSCRG00010001333-TEX38 | Predicted to be located in membrane. Is expressed in lung. |
| 10_98932373 | 10 | 98932373 | 3.19E-04 | 98890000 | 98940000 | 0.1100 | CHIC2-LNX1 | Predicted to act upstream of or within Golgi to plasma membrane transport. |
| 10_98938043 | 10 | 98938043 | 2.30E-04 | 98890000 | 98940000 | 0.1100 | CHIC2-LNX1 | Predicted to act upstream of or within Golgi to plasma membrane transport. |
| 6_64974480 | 6 | 64974480 | 1.50E-04 | 64940000 | 64990000 | 0.0922 | JMY | Acts both as a nuclear p53/TP53-cofactor and a cytoplasmic regulator of actin dynamics depending on conditions. |
| 6_128865907 | 6 | 128865907 | 1.19E-07 | 128820000 | 128870000 | 0.1098 | ENSSCRG00010019700 | no annotation available |
| 8_77921084 | 8 | 77921084 | 3.52E-04 | 77890000 | 77940000 | 0.1097 | Ahr-SNX13 | The protein encoded by this gene is a ligand-activated helix-loop-helix transcription factor involved in the regulation of biological responses to planar aromatic hydrocarbons. |
| 6_83290154 | 6 | 83290154 | 2.32E-04 | 83290000 | 83340000 | 0.1096 | CHD1 | Predicted to enable several functions, including ATP hydrolysis activity; ATP-dependent chromatin remodeler activity; and methylated histone binding activity. |
| 6_83302495 | 6 | 83302495 | 9.62E-05 | 83290000 | 83340000 | 0.1096 | CHD1 | Predicted to enable several functions, including ATP hydrolysis activity; ATP-dependent chromatin remodeler activity; and methylated histone binding activity. |
| 4_128281913 | 4 | 128281913 | 4.29E-06 | 128240000 | 128290000 | 0.1096 | ENSSCRG00010010766 | no annotation available |
| 6_79094725 | 6 | 79094725 | 3.44E-04 | 79090000 | 79140000 | 0.1031 | KIAA0825 | Is expressed in several structures, including adipose tissue; adrenal gland; genitourinary system; gut; and nervous system. |
| 6_70845793 | 6 | 70845793 | 7.39E-06 | 70840000 | 70890000 | 0.1095 | ENSSCRG00010005906-COX7C | Predicted to be involved in mitochondrial electron transport, cytochrome c to oxygen. |
| 6_70880136 | 6 | 70880136 | 7.68E-05 | 70840000 | 70890000 | 0.1095 | ENSSCRG00010005906-COX7C | Predicted to be involved in mitochondrial electron transport, cytochrome c to oxygen. |
| 6_70888133 | 6 | 70888133 | 7.06E-05 | 70840000 | 70890000 | 0.1095 | ENSSCRG00010005906-COX7C | Predicted to be involved in mitochondrial electron transport, cytochrome c to oxygen. |
| 2_7290016 | 2 | 7290016 | 1.52E-06 | 7280000 | 7330000 | 0.1095 | ENSSCRG00010005886-DOK5 | Acts upstream of or within cell surface receptor protein tyrosine kinase signaling pathway; neuron differentiation; and positive regulation of MAPK cascade. |
| 5_138171173 | 5 | 138171173 | 1.02E-06 | 138150000 | 138200000 | 0.0933 | KIF20B-ENSSCRG00010007624 | Predicted to enable several functions, including ATP hydrolysis activity; WW domain binding activity; and plus-end-directed microtubule motor activity. |
| 5_112461381 | 5 | 112461381 | 9.37E-06 | 112420000 | 112470000 | 0.1095 | ANK3 | This gene encodes a member of the ankyrin protein family. Ankyrins link integral membrane proteins to the spectrin-based cytoskeleton. |
| 11_123068278 | 11 | 123068278 | 2.25E-05 | 123060000 | 123110000 | 0.1093 | ENSSCRG00010011635 | no annotation available |
| 11_127994703 | 11 | 127994703 | 4.93E-05 | 127990000 | 128040000 | 0.1126 | KIRREL3-ETS1 | Predicted to enable cell adhesion molecule binding activity. Involved in hemopoiesis; homophilic cell adhesion via plasma membrane adhesion molecules; and nervous system development. |
| 6_75363994 | 6 | 75363994 | 1.27E-04 | 75320000 | 75370000 | 0.1093 | CETN3 | Enables G-protein beta/gamma-subunit complex binding activity and microtubule binding activity. Predicted to be involved in microtubule cytoskeleton organization. |
| 6_79376906 | 6 | 79376906 | 2.21E-06 | 79330000 | 79380000 | 0.1091 | MCTP1 | Predicted to enable calcium ion binding activity. Predicted to be involved in several processes, including negative regulation of endocytosis; negative regulation of response to oxidative stress; and regulation of neurotransmitter secretion |
| 6_72184944 | 6 | 72184944 | 4.78E-05 | 72180000 | 72230000 | 0.1090 | ENSSCRG00010005937-ENSSCRG00010005947 | no annotation available |
| 6_76690144 | 6 | 76690144 | 1.19E-05 | 76670000 | 76720000 | 0.1086 | ENSSCRG00010006791 | no annotation available |
| 6_76715278 | 6 | 76715278 | 3.94E-07 | 76670000 | 76720000 | 0.1086 | ENSSCRG00010006791 | no annotation available |
| 6_59187098 | 6 | 59187098 | 1.49E-04 | 59140000 | 59190000 | 0.1084 | ANKRD31 | Involved in homologous chromosome pairing at meiosis; meiotic DNA double-strand break formation involved in reciprocal meiotic recombination; and positive regulation of meiotic DNA double-strand break formation. |
| 6_81488738 | 6 | 81488738 | 3.56E-04 | 81460000 | 81510000 | 0.1115 | LNPEP | Enables aminopeptidase activity. Involved in negative regulation of cold-induced thermogenesis. |
| 5_101759959 | 5 | 101759959 | 1.28E-06 | 101720000 | 101770000 | 0.1084 | C10orf71 | Involved in positive regulation of calcineurin-NFAT signaling cascade. |
| 5_65425382 | 5 | 65425382 | 7.95E-11 | 65420000 | 65470000 | 0.1083 | ENSSCRG00010010958-ENSSCRG00010010968 | no annotation available |
| 6_68361009 | 6 | 68361009 | 1.04E-04 | 68320000 | 68370000 | 0.1082 | Atp6ap1l-TMEM167A | Predicted to enable ATPase activator activity. Predicted to be involved in regulation of cellular pH. |
| 6_117113674 | 6 | 117113674 | 1.04E-05 | 117070000 | 117120000 | 0.1058 | LOX | This gene encodes a precursor protein that belongs to the lysyl oxidase family of proteins. |
| 5_134521452 | 5 | 134521452 | 2.41E-04 | 134520000 | 134570000 | 0.1081 | LRIT1 | Predicted to be involved in visual perception. |
| 6_58770012 | 6 | 58770012 | 2.56E-05 | 58730000 | 58780000 | 0.1080 | ANKDD1B | Predicted to be involved in signal transduction. |
| 10_71092579 | 10 | 71092579 | 3.53E-04 | 71090000 | 71140000 | 0.1080 | ARHGAP24-WDFY3 | Enables GTPase activator activity. Acts upstream of or within several processes, including activation of GTPase activity; negative regulation of Rac protein signal transduction; and negative regulation of ruffle assembly. |
| 6_138913642 | 6 | 138913642 | 2.28E-06 | 138900000 | 138950000 | 0.0933 | LYRM7 | Predicted to enable protein folding chaperone. |
| 6_75469264 | 6 | 75469264 | 2.50E-04 | 75460000 | 75510000 | 0.1074 | LYSMD3 | Predicted to enable peptidoglycan binding activity. |
| 6_71057363 | 6 | 71057363 | 1.03E-04 | 71040000 | 71090000 | 0.1078 | ENSSCRG00010005906-COX7C | Predicted to be involved in mitochondrial electron transport, cytochrome c to oxygen. |
| 6_71060518 | 6 | 71060518 | 1.91E-04 | 71040000 | 71090000 | 0.1078 | ENSSCRG00010005906-COX7C | Predicted to be involved in mitochondrial electron transport, cytochrome c to oxygen. |
| 6_71082389 | 6 | 71082389 | 1.39E-06 | 71040000 | 71090000 | 0.1078 | ENSSCRG00010005906-COX7C | Predicted to be involved in mitochondrial electron transport, cytochrome c to oxygen. |
| 6_76045422 | 6 | 76045422 | 1.03E-07 | 76010000 | 76060000 | 0.1077 | ENSSCRG00010006708 | no annotation available |
| 5_31660505 | 5 | 31660505 | 1.17E-05 | 31660000 | 31710000 | 0.1194 | MAB21L1 | Predicted to enable metal ion binding activity; nucleotide binding activity; and nucleotidyltransferase activity. |
| 6_78087367 | 6 | 78087367 | 7.96E-05 | 78040000 | 78090000 | 0.1072 | ENSSCRG00010006791-NR2F1 | Enables sequence-specific DNA binding activity. Acts upstream of or within nervous system development and regulation of DNA-templated transcription. |
| 5_119495159 | 5 | 119495159 | 7.25E-08 | 119470000 | 119520000 | 0.1072 | CTNNA3 | Predicted to enable actin filament binding activity and beta-catenin binding activity. Involved in cell-cell adhesion. |
| 1_188386916 | 1 | 188386916 | 3.74E-04 | 188340000 | 188390000 | 0.1072 | TMEM200B | Ubiquitous expression in ovary adult |
| 5_117834701 | 5 | 117834701 | 6.12E-05 | 117820000 | 117870000 | 0.1072 | ENSSCRG00010009059 | no annotation available |
| 6_77966400 | 6 | 77966400 | 2.21E-06 | 77940000 | 77990000 | 0.1071 | ENSSCRG00010006791-NR2F1 | Enables sequence-specific DNA binding activity. Acts upstream of or within nervous system development and regulation of DNA-templated transcription. |
| 6_70253627 | 6 | 70253627 | 3.68E-04 | 70250000 | 70300000 | 0.1071 | EDIL3-ENSSCRG00010005906 | Predicted to enable calcium ion binding activity. Acts upstream of or within positive regulation of cell-substrate adhesion. |
| 6_70282692 | 6 | 70282692 | 3.51E-04 | 70250000 | 70300000 | 0.1071 | EDIL3-ENSSCRG00010005906 | Predicted to enable calcium ion binding activity. Acts upstream of or within positive regulation of cell-substrate adhesion. |
| 6_80422063 | 6 | 80422063 | 4.16E-08 | 80400000 | 80450000 | 0.1070 | ENSSCRG00010007851 | no annotation available |
| 5_54344722 | 5 | 54344722 | 2.39E-04 | 54300000 | 54350000 | 0.1070 | DIAPH3 | Enables actin binding activity; microtubule binding activity; and protein homodimerization activity. Involved in actin filament polymerization. Acts upstream of or within several processes, including autophagosome-lysosome fusion; cytoskeleton organization; and myeloid cell differentiation. |
| 1_115991794 | 1 | 115991794 | 2.28E-04 | 115980000 | 116030000 | 0.1070 | ENSSCRG00010001333-TEX38 | Predicted to be located in membrane. Is expressed in lung. |
| 6_75388857 | 6 | 75388857 | 1.99E-05 | 75340000 | 75390000 | 0.0973 | MBLAC2 | Predicted to enable beta-lactamase activity and long-chain fatty acyl-CoA hydrolase activity. |
| 6_74516592 | 6 | 74516592 | 1.03E-07 | 74490000 | 74540000 | 0.1070 | MEF2C-ENSSCRG00010006300 | Enables several functions, including DNA-binding transcription activator activity, RNA polymerase II-specific; HMG box domain binding activity; and histone deacetylase binding activity. Involved in several processes, including heart development; modulation of chemical synaptic transmission; and positive regulation of cell differentiation. |
| 6_74533096 | 6 | 74533096 | 1.35E-07 | 74490000 | 74540000 | 0.1070 | MEF2C-ENSSCRG00010006300 | Enables several functions, including DNA-binding transcription activator activity, RNA polymerase II-specific; HMG box domain binding activity; and histone deacetylase binding activity. Involved in several processes, including heart development; modulation of chemical synaptic transmission; and positive regulation of cell differentiation. |
| 6_59819084 | 6 | 59819084 | 1.07E-05 | 59810000 | 59860000 | 0.1067 | ENC1-ARHGEF28 | Predicted to enable actin binding activity. Predicted to be involved in several processes, including negative regulation of translation; positive regulation of neuron projection development; and proteasomal ubiquitin-independent protein catabolic process. |
| 7_32805355 | 7 | 32805355 | 1.95E-04 | 32800000 | 32850000 | 0.1256 | MOXD1-CCN2 | Predicted to enable copper ion binding activity and dopamine beta-monooxygenase activity. |
| 6_131081407 | 6 | 131081407 | 1.90E-06 | 131080000 | 131130000 | 0.1065 | CPLX2 | Predicted to enable calcium-dependent protein binding activity and syntaxin-1 binding activity. Involved in positive regulation of synaptic plasticity and regulation of synaptic vesicle fusion to presynaptic active zone membrane. |
| 6_72301824 | 6 | 72301824 | 5.86E-05 | 72290000 | 72340000 | 0.1065 | ENSSCRG00010005937-ENSSCRG00010005947 | no annotation available |
| 6_66299206 | 6 | 66299206 | 1.77E-04 | 66250000 | 66300000 | 0.0971 | MSH3 | Component of the post-replicative DNA mismatch repair system (MMR). |
| 1_115978726 | 1 | 115978726 | 3.48E-04 | 115970000 | 116020000 | 0.1062 | ENSSCRG00010001333-TEX38 | Predicted to be located in membrane. Is expressed in lung. |
| 1_115299367 | 1 | 115299367 | 2.34E-06 | 115250000 | 115300000 | 0.1062 | ENSSCRG00010001324-ENSSCRG00010001333 | no annotation available |
| 8_50728022 | 8 | 50728022 | 2.94E-31 | 50720000 | 50770000 | 0.0914 | MTERF1-FZD1 | Predicted to be involved in DNA geometric change and termination of mitochondrial transcription. |
| 6_69782264 | 6 | 69782264 | 6.61E-05 | 69740000 | 69790000 | 0.1061 | EDIL3 | Predicted to enable calcium ion binding activity. Acts upstream of or within positive regulation of cell-substrate adhesion. |
| 14_39589692 | 14 | 39589692 | 1.65E-05 | 39580000 | 39630000 | 0.1061 | ACO1 | This gene encodes a member of the aconitase/IPM isomerase protein family. Disruption of this gene is associated with pulmonary hypertension and polycythemia. |
| 14_39600210 | 14 | 39600210 | 1.47E-07 | 39580000 | 39630000 | 0.1061 | Ddx58 | Enables double-stranded DNA binding activity; double-stranded RNA binding activity; and single-stranded RNA binding activity. Involved in several processes, including innate immune response; positive regulation of cytokine production; and response to virus. |
| 14_39613800 | 14 | 39613800 | 1.47E-05 | 39580000 | 39630000 | 0.1061 | Ddx58 | Enables double-stranded DNA binding activity; double-stranded RNA binding activity; and single-stranded RNA binding activity. Involved in several processes, including innate immune response; positive regulation of cytokine production; and response to virus. |
| 14_39615187 | 14 | 39615187 | 3.49E-05 | 39580000 | 39630000 | 0.1061 | Ddx58 | Enables double-stranded DNA binding activity; double-stranded RNA binding activity; and single-stranded RNA binding activity. Involved in several processes, including innate immune response; positive regulation of cytokine production; and response to virus. |
| 8_84600154 | 8 | 84600154 | 9.24E-05 | 84570000 | 84620000 | 0.1060 | CYCS | Enables heme binding activity. Acts upstream of or within activation of cysteine-type endopeptidase activity involved in apoptotic process by cytochrome c; apoptotic process; and hydrogen peroxide metabolic process. |
| 5_94282878 | 5 | 94282878 | 2.28E-05 | 94280000 | 94330000 | 0.1060 | ENSSCRG00010002529 | no annotation available |
| 5_94316049 | 5 | 94316049 | 2.30E-04 | 94280000 | 94330000 | 0.1060 | ENSSCRG00010002529-PTEN | This gene encodes a phosphatase with dual activity against phospholipids and proteins, and acts as a tumor-suppressor. |
| 6_76739911 | 6 | 76739911 | 2.21E-06 | 76710000 | 76760000 | 0.1060 | ENSSCRG00010006791 | no annotation available |
| 9_65296914 | 9 | 65296914 | 1.31E-04 | 65290000 | 65340000 | 0.1060 | DLG1 | Enables molecular adaptor activity and potassium channel regulator activity. A structural constituent of postsynaptic density. Involved in several processes, including membrane repolarization during ventricular cardiac muscle cell action potential; neurotransmitter receptor localization to postsynaptic specialization membrane; and regulation of potassium ion transmembrane transport. |
| 9_65319663 | 9 | 65319663 | 5.88E-07 | 65290000 | 65340000 | 0.1060 | DLG1 | Enables molecular adaptor activity and potassium channel regulator activity. A structural constituent of postsynaptic density. Involved in several processes, including membrane repolarization during ventricular cardiac muscle cell action potential; neurotransmitter receptor localization to postsynaptic specialization membrane; and regulation of potassium ion transmembrane transport. |
| 9_65336071 | 9 | 65336071 | 8.15E-05 | 65290000 | 65340000 | 0.1060 | DLG1 | Enables molecular adaptor activity and potassium channel regulator activity. A structural constituent of postsynaptic density. Involved in several processes, including membrane repolarization during ventricular cardiac muscle cell action potential; neurotransmitter receptor localization to postsynaptic specialization membrane; and regulation of potassium ion transmembrane transport. |
| 8_50728075 | 8 | 50728075 | 3.42E-04 | 50720000 | 50770000 | 0.0914 | MTERF1-FZD1 | Predicted to be involved in DNA geometric change and termination of mitochondrial transcription. |
| 14_17849264 | 14 | 17849264 | 4.06E-07 | 17830000 | 17880000 | 0.1058 | ASTN2 | Predicted to enable calcium ion binding activity and inositol 1,3,4,5 tetrakisphosphate binding activity. Acts upstream of or within establishment of body hair planar orientation and negative regulation of protein localization to cell surface. |
| 6_74820757 | 6 | 74820757 | 1.84E-05 | 74780000 | 74830000 | 0.1057 | ENSSCRG00010006300-CETN3 | Enables G-protein beta/gamma-subunit complex binding activity and microtubule binding activity. Predicted to be involved in microtubule cytoskeleton organization. |
| 6_74823725 | 6 | 74823725 | 1.49E-04 | 74780000 | 74830000 | 0.1057 | ENSSCRG00010006300-CETN3 | Enables G-protein beta/gamma-subunit complex binding activity and microtubule binding activity. Predicted to be involved in microtubule cytoskeleton organization. |
| 6_74827111 | 6 | 74827111 | 1.17E-05 | 74780000 | 74830000 | 0.1057 | ENSSCRG00010006300-CETN3 | Enables G-protein beta/gamma-subunit complex binding activity and microtubule binding activity. Predicted to be involved in microtubule cytoskeleton organization. |
| 5_117744318 | 5 | 117744318 | 3.58E-06 | 117710000 | 117760000 | 0.1057 | REEP3-ENSSCRG00010009059 | Predicted to enable microtubule binding activity. Predicted to be involved in endoplasmic reticulum tubular network organization and mitotic nuclear membrane reassembly. |
| 6_78776196 | 6 | 78776196 | 2.21E-06 | 78770000 | 78820000 | 0.1057 | FAM172A | Predicted to contribute to siRNA binding activity. Involved in neural crest cell development and regulation of alternative mRNA splicing, via spliceosome. |
| 2_7111254 | 2 | 7111254 | 1.82E-06 | 7070000 | 7120000 | 0.1057 | ENSSCRG00010005886-DOK5 | Acts upstream of or within cell surface receptor protein tyrosine kinase signaling pathway; neuron differentiation; and positive regulation of MAPK cascade. |
| 8_50747233 | 8 | 50747233 | 1.53E-30 | 50720000 | 50770000 | 0.0914 | MTERF1-FZD1 | Predicted to be involved in DNA geometric change and termination of mitochondrial transcription. |
| 8_50765689 | 8 | 50765689 | 5.80E-08 | 50720000 | 50770000 | 0.0914 | MTERF1-FZD1 | Predicted to be involved in DNA geometric change and termination of mitochondrial transcription. |
| 8_50769845 | 8 | 50769845 | 2.94E-31 | 50720000 | 50770000 | 0.0914 | MTERF1-FZD1 | Predicted to be involved in DNA geometric change and termination of mitochondrial transcription. |
| 7_148219372 | 7 | 148219372 | 2.26E-06 | 148200000 | 148250000 | 0.1254 | NHLRC1 | The protein encoded by this gene is a single subunit E3 ubiquitin ligase. |
| 5_35109773 | 5 | 35109773 | 7.60E-05 | 35060000 | 35110000 | 0.1061 | NHLRC3-LHFPL6 | The protein encoded by this gene is a single subunit E3 ubiquitin ligase. |
| 6_119621449 | 6 | 119621449 | 2.28E-04 | 119620000 | 119670000 | 0.1052 | ENSSCRG00010008890-ARL5A | Predicted to enable GTP binding activity. Predicted to be involved in intracellular protein transport; protein localization to Golgi membrane; and vesicle-mediated transport. |
| 2_7627981 | 2 | 7627981 | 1.88E-04 | 7590000 | 7640000 | 0.1048 | DOK5-PFDN4 | Acts upstream of or within cell surface receptor protein tyrosine kinase signaling pathway; neuron differentiation; and positive regulation of MAPK cascade. |
| 6_57380784 | 6 | 57380784 | 1.43E-04 | 57380000 | 57430000 | 0.1048 | CCDC125 | Predicted to enable identical protein binding activity. Predicted to be involved in activation of GTPase activity; negative regulation of Rho protein signal transduction; and negative regulation of cell motility. |
| 6_57395283 | 6 | 57395283 | 1.08E-04 | 57380000 | 57430000 | 0.1048 | CCDC125 | Predicted to enable identical protein binding activity. Predicted to be involved in activation of GTPase activity; negative regulation of Rho protein signal transduction; and negative regulation of cell motility. |
| 10_101662500 | 10 | 101662500 | 1.03E-05 | 101640000 | 101690000 | 0.1046 | CORIN | Enables serine-type endopeptidase activity. Involved in several processes, including peptide hormone processing; regulation of renal sodium excretion; and regulation of systemic arterial blood pressure by atrial natriuretic peptide. |
| 2_129555351 | 2 | 129555351 | 2.62E-05 | 129550000 | 129600000 | 0.0999 | NOVA1-FABP5 | Enables mRNA 3'-UTR binding activity and sequence-specific mRNA binding activity. Involved in negative regulation of cold-induced thermogenesis and regulation of alternative mRNA splicing, via spliceosome. |
| 6_78173067 | 6 | 78173067 | 1.16E-04 | 78160000 | 78210000 | 0.1037 | NR2F1 | Enables sequence-specific DNA binding activity. Acts upstream of or within nervous system development and regulation of DNA-templated transcription. |
| 6_78175535 | 6 | 78175535 | 7.49E-05 | 78160000 | 78210000 | 0.1037 | NR2F1 | Enables sequence-specific DNA binding activity. Acts upstream of or within nervous system development and regulation of DNA-templated transcription. |
| 8_83674742 | 8 | 83674742 | 4.92E-05 | 83670000 | 83720000 | 0.1044 | STK31-NPY | Enables protein kinase activity. Acts upstream of or within protein phosphorylation |
| 6_68983723 | 6 | 68983723 | 3.57E-04 | 68960000 | 69010000 | 0.1042 | VCAN | Enables protein phosphatase binding activity. Involved in ureteric bud development. |
| 6_68995499 | 6 | 68995499 | 3.57E-04 | 68960000 | 69010000 | 0.1042 | VCAN | Enables protein phosphatase binding activity. Involved in ureteric bud development. |
| 6_68997311 | 6 | 68997311 | 1.40E-05 | 68960000 | 69010000 | 0.1042 | VCAN | Enables protein phosphatase binding activity. Involved in ureteric bud development. |
| 8_44701335 | 8 | 44701335 | 1.07E-17 | 44700000 | 44750000 | 0.1042 | COL28A1 | Predicted to enable heparin binding activity. Predicted to be an extracellular matrix structural constituent conferring tensile strength. Predicted to be involved in cell adhesion and collagen fibril organization. |
| 8_44710638 | 8 | 44710638 | 2.94E-07 | 44700000 | 44750000 | 0.1042 | COL28A1 | Predicted to enable heparin binding activity. Predicted to be an extracellular matrix structural constituent conferring tensile strength. Predicted to be involved in cell adhesion and collagen fibril organization. |
| 8_44728101 | 8 | 44728101 | 1.40E-15 | 44700000 | 44750000 | 0.1042 | COL28A1 | Predicted to enable heparin binding activity. Predicted to be an extracellular matrix structural constituent conferring tensile strength. Predicted to be involved in cell adhesion and collagen fibril organization. |
| 8_44730552 | 8 | 44730552 | 6.73E-07 | 44700000 | 44750000 | 0.1042 | COL28A1 | Predicted to enable heparin binding activity. Predicted to be an extracellular matrix structural constituent conferring tensile strength. Predicted to be involved in cell adhesion and collagen fibril organization. |
| 8_44741263 | 8 | 44741263 | 4.87E-05 | 44700000 | 44750000 | 0.1042 | COL28A1 | Predicted to enable heparin binding activity. Predicted to be an extracellular matrix structural constituent conferring tensile strength. Predicted to be involved in cell adhesion and collagen fibril organization. |
| 6_60691411 | 6 | 60691411 | 1.57E-04 | 60690000 | 60740000 | 0.1042 | ARHGEF28 | Predicted to enable guanyl-nucleotide exchange factor activity. Acts upstream of or within central nervous system neuron axonogenesis and neurofilament cytoskeleton organization. |
| 6_60703118 | 6 | 60703118 | 1.16E-04 | 60690000 | 60740000 | 0.1042 | ENSSCRG00010013234 | no annotation available |
| 4_141715663 | 4 | 141715663 | 4.58E-05 | 141710000 | 141760000 | 0.1041 | ENSSCRG00010004100 | no annotation available |
| 6_78188296 | 6 | 78188296 | 2.16E-09 | 78160000 | 78210000 | 0.1037 | NR2F1 | Enables sequence-specific DNA binding activity. Acts upstream of or within nervous system development and regulation of DNA-templated transcription. |
| 6_87519959 | 6 | 87519959 | 2.11E-05 | 87500000 | 87550000 | 0.1187 | NUDT12-ENSSCRG00010013682 | Nudix hydrolases, such as NUDT12, regulate the concentrations of individual nucleotides and of nucleotide ratios in response to changing circumstances |
| 1_118543344 | 1 | 118543344 | 1.02E-04 | 118510000 | 118560000 | 0.1183 | OLFM3 | Predicted to be involved in eye photoreceptor cell development and signal transduction. |
| 4_103909400 | 4 | 103909400 | 9.39E-07 | 103870000 | 103920000 | 0.1039 | ENSSCRG00010004278 | no annotation available |
| 8_83388905 | 8 | 83388905 | 1.00E-04 | 83340000 | 83390000 | 0.1039 | STK31 | Enables protein kinase activity. Acts upstream of or within protein phosphorylation |
| 8_83389112 | 8 | 83389112 | 4.52E-05 | 83340000 | 83390000 | 0.1039 | STK31 | Enables protein kinase activity. Acts upstream of or within protein phosphorylation |
| 2_7045546 | 2 | 7045546 | 8.81E-07 | 7020000 | 7070000 | 0.1038 | ENSSCRG00010005886-DOK5 | Acts upstream of or within cell surface receptor protein tyrosine kinase signaling pathway; neuron differentiation; and positive regulation of MAPK cascade. |
| 14_43285993 | 14 | 43285993 | 2.10E-05 | 43280000 | 43330000 | 0.1038 | ENSSCRG00010014998-LINGO2 | Acts upstream of or within positive regulation of synapse assembly. Predicted to be located in glutamatergic synapse and synaptic membrane. |
| 14_43291314 | 14 | 43291314 | 9.25E-05 | 43280000 | 43330000 | 0.1038 | ENSSCRG00010014998-LINGO2 | Acts upstream of or within positive regulation of synapse assembly. Predicted to be located in glutamatergic synapse and synaptic membrane. |
| 14_43294891 | 14 | 43294891 | 5.06E-05 | 43280000 | 43330000 | 0.1038 | ENSSCRG00010014998-LINGO2 | Acts upstream of or within positive regulation of synapse assembly. Predicted to be located in glutamatergic synapse and synaptic membrane. |
| 14_43302728 | 14 | 43302728 | 9.25E-05 | 43280000 | 43330000 | 0.1038 | ENSSCRG00010014998-LINGO2 | Acts upstream of or within positive regulation of synapse assembly. Predicted to be located in glutamatergic synapse and synaptic membrane. |
| 1_118566468 | 1 | 118566468 | 3.42E-04 | 118520000 | 118570000 | 0.1013 | OLFM3 | Predicted to be involved in eye photoreceptor cell development and signal transduction. |
| 5_55912545 | 5 | 55912545 | 1.90E-04 | 55900000 | 55950000 | 0.0928 | PCDH20-GSK3B | This gene belongs to the protocadherin gene family, a subfamily of the cadherin superfamily. The encoded protein contains six extracellular cadherin domains, a transmembrane domain, and a cytoplasmic tail differing from those of the classical cadherins. The encoded protein may play a role in cell adhesion in the nervous system and has been shown to be specifically expressed in newly differentiated olfactory sensory neurons and their axons during development. |
| 5_55943778 | 5 | 55943778 | 1.90E-04 | 55900000 | 55950000 | 0.0928 | PCDH20-GSK3B | This gene belongs to the protocadherin gene family, a subfamily of the cadherin superfamily. The encoded protein contains six extracellular cadherin domains, a transmembrane domain, and a cytoplasmic tail differing from those of the classical cadherins. The encoded protein may play a role in cell adhesion in the nervous system and has been shown to be specifically expressed in newly differentiated olfactory sensory neurons and their axons during development. |
| 2_6666005 | 2 | 6666005 | 1.04E-05 | 6620000 | 6670000 | 0.1036 | ENSSCRG00010005879-ENSSCRG00010005886 | no annotation available |
| 2_7894097 | 2 | 7894097 | 1.85E-05 | 7880000 | 7930000 | 0.1036 | BCAS1 | Predicted to enable protein homodimerization activity. Involved in myelination. Predicted to be located in cytosol. Predicted to be active in synapse. |
| 2_7900627 | 2 | 7900627 | 1.84E-05 | 7880000 | 7930000 | 0.1036 | BCAS1 | Predicted to enable protein homodimerization activity. Involved in myelination. Predicted to be located in cytosol. Predicted to be active in synapse. |
| 2_7921263 | 2 | 7921263 | 1.30E-04 | 7880000 | 7930000 | 0.1036 | BCAS1 | Predicted to enable protein homodimerization activity. Involved in myelination. Predicted to be located in cytosol. Predicted to be active in synapse. |
| 6_72771969 | 6 | 72771969 | 3.77E-04 | 72740000 | 72790000 | 0.1035 | CCNH-TMEM161B | Enables kinase activity. Predicted to be involved in several processes, including protein stabilization; regulation of G1/S transition of mitotic cell cycle; and transcription initiation at RNA polymerase II promoter. |
| 6_59886258 | 6 | 59886258 | 3.53E-04 | 59840000 | 59890000 | 0.1033 | ENC1-ARHGEF28 | Predicted to enable actin binding activity. Predicted to be involved in several processes, including negative regulation of translation; positive regulation of neuron projection development; and proteasomal ubiquitin-independent protein catabolic process. |
| 6_82643979 | 6 | 82643979 | 1.07E-05 | 82600000 | 82650000 | 0.1032 | CHIA-RGMB | Enables chitin binding activity and chitinase activity. Involved in chitin catabolic process. |
| 6_75807335 | 6 | 75807335 | 1.85E-05 | 75760000 | 75810000 | 0.1032 | ADGRV1 | Enables several functions, including G-protein alpha-subunit binding activity; adenylate cyclase inhibitor activity; and myosin binding activity. Involved in several processes, including negative regulation of adenylate cyclase activity; positive regulation of bone mineralization; and self proteolysis. Acts upstream of or within several processes, including detection of mechanical stimulus involved in sensory perception of sound; inner ear receptor cell stereocilium organization; and positive regulation of cAMP/PKA signal transduction. |
| 2_7935783 | 2 | 7935783 | 1.07E-04 | 7890000 | 7940000 | 0.1031 | BCAS1 | Predicted to enable protein homodimerization activity. Involved in myelination. Predicted to be located in cytosol. Predicted to be active in synapse. |
| 2_7710734 | 2 | 7710734 | 8.81E-06 | 7670000 | 7720000 | 0.1311 | PFDN4 | Predicted to enable amyloid-beta binding activity and unfolded protein binding activity. |
| 15_38114976 | 15 | 38114976 | 3.22E-04 | 38110000 | 38160000 | 0.1028 | CDH2-ENSSCRG00010017542 | This gene encodes a member of the cadherin family of calcium-dependent glycoproteins that mediate cell adhesion. |
| 5_114373164 | 5 | 114373164 | 1.94E-05 | 114340000 | 114390000 | 0.1022 | ARID5B | Predicted to enable transcription cis-regulatory region binding activity and transcription coactivator activity. Involved in adipose tissue development. Acts upstream of or within several processes, including cellular response to leukemia inhibitory factor; face morphogenesis; and gonad development. |
| 6_59192275 | 6 | 59192275 | 1.05E-05 | 59190000 | 59240000 | 0.1022 | ANKRD31 | Involved in homologous chromosome pairing at meiosis; meiotic DNA double-strand break formation involved in reciprocal meiotic recombination; and positive regulation of meiotic DNA double-strand break formation. |
| 2_7748970 | 2 | 7748970 | 1.28E-06 | 7700000 | 7750000 | 0.1219 | PFDN4 | Predicted to enable amyloid-beta binding activity and unfolded protein binding activity. |
| 2_8290741 | 2 | 8290741 | 7.12E-08 | 8280000 | 8330000 | 0.1021 | ENSSCRG00010006110-ENSSCRG00010006119 | no annotation available |
| 2_8313680 | 2 | 8313680 | 2.25E-04 | 8280000 | 8330000 | 0.1021 | ENSSCRG00010006119 | no annotation available |
| 8_83289403 | 8 | 83289403 | 1.01E-07 | 83280000 | 83330000 | 0.1021 | STK31 | Enables protein kinase activity. Acts upstream of or within protein phosphorylation |
| 8_83296919 | 8 | 83296919 | 3.93E-05 | 83280000 | 83330000 | 0.1021 | STK31 | Enables protein kinase activity. Acts upstream of or within protein phosphorylation |
| 2_6118313 | 2 | 6118313 | 8.44E-05 | 6110000 | 6160000 | 0.1020 | MC3R-CBLN4 | This gene maps to the same region as the locus for benign neonatal epilepsy. Mice deficient for this gene have increased fat mass despite decreased food intake, suggesting a role for this gene product in the regulation of energy homeostasis. |
| 13_7901929 | 13 | 7901929 | 2.29E-04 | 7860000 | 7910000 | 0.1018 | AFF3 | Enables DNA-binding transcription factor activity and double-stranded DNA binding activity. Involved in embryonic hindlimb morphogenesis and regulation of DNA-templated transcription. |
| 5_121121410 | 5 | 121121410 | 7.25E-08 | 121080000 | 121130000 | 0.1018 | TSPAN15 | Enables enzyme binding activity. Involved in protein maturation. |
| 5_54261381 | 5 | 54261381 | 1.90E-04 | 54240000 | 54290000 | 0.1018 | DIAPH3 | Enables actin binding activity; microtubule binding activity; and protein homodimerization activity. Involved in actin filament polymerization. Acts upstream of or within several processes, including autophagosome-lysosome fusion; cytoskeleton organization; and myeloid cell differentiation. |
| 5_54282110 | 5 | 54282110 | 1.28E-04 | 54240000 | 54290000 | 0.1018 | DIAPH3 | Enables actin binding activity; microtubule binding activity; and protein homodimerization activity. Involved in actin filament polymerization. Acts upstream of or within several processes, including autophagosome-lysosome fusion; cytoskeleton organization; and myeloid cell differentiation. |
| 6_74289365 | 6 | 74289365 | 3.40E-04 | 74280000 | 74330000 | 0.1016 | MEF2C-ENSSCRG00010006300 | Enables several functions, including DNA-binding transcription activator activity, RNA polymerase II-specific; HMG box domain binding activity; and histone deacetylase binding activity. Involved in several processes, including heart development; modulation of chemical synaptic transmission; and positive regulation of cell differentiation. |
| 6_73424712 | 6 | 73424712 | 1.57E-04 | 73390000 | 73440000 | 0.1016 | TMEM161B-ENSSCRG00010006082 | Involved in regulation of cardiac muscle cell action potential and regulation of heart rate. |
| 6_73428945 | 6 | 73428945 | 4.33E-06 | 73390000 | 73440000 | 0.1016 | TMEM161B-ENSSCRG00010006082 | Involved in regulation of cardiac muscle cell action potential and regulation of heart rate. |
| 6_65481541 | 6 | 65481541 | 5.90E-05 | 65480000 | 65530000 | 0.1014 | ENSSCRG00010005102 | no annotation available |
| 6_128890841 | 6 | 128890841 | 1.28E-04 | 128860000 | 128910000 | 0.1014 | ENSSCRG00010019700 | no annotation available |
| 6_128904879 | 6 | 128904879 | 5.27E-05 | 128860000 | 128910000 | 0.1014 | ENSSCRG00010019700 | no annotation available |
| 8_141776013 | 8 | 141776013 | 1.61E-04 | 141730000 | 141780000 | 0.1164 | PIWIL1 | Enables several functions, including RNA binding activity; mRNA cap binding complex binding activity; and protein kinase binding activity. |
| 5_61883325 | 5 | 61883325 | 3.09E-05 | 61840000 | 61890000 | 0.1012 | ENSSCRG00010010776-ENSSCRG00010010786 | no annotation available |
| 5_117448591 | 5 | 117448591 | 9.86E-07 | 117440000 | 117490000 | 0.1012 | REEP3-ENSSCRG00010009059 | Predicted to enable microtubule binding activity. Predicted to be involved in endoplasmic reticulum tubular network organization and mitotic nuclear membrane reassembly. |
| 6_58872927 | 6 | 58872927 | 2.05E-05 | 58870000 | 58920000 | 0.1011 | ANKDD1B | Predicted to be involved in signal transduction. |
| 6_58885832 | 6 | 58885832 | 4.33E-05 | 58870000 | 58920000 | 0.1011 | ANKDD1B | Predicted to be involved in signal transduction. |
| 5_32427351 | 5 | 32427351 | 3.54E-08 | 32420000 | 32470000 | 0.1011 | CCDC169 | Predicted to be located in extracellular region. Is expressed in several structures, including intestine; liver; metanephros; retina nuclear layer; and skeletal muscle. |
| 5_32448038 | 5 | 32448038 | 2.64E-04 | 32420000 | 32470000 | 0.1011 | CCDC169 | Predicted to be located in extracellular region. Is expressed in several structures, including intestine; liver; metanephros; retina nuclear layer; and skeletal muscle. |
| 5_114453688 | 5 | 114453688 | 1.14E-04 | 114410000 | 114460000 | 0.1010 | ARID5B | Predicted to enable transcription cis-regulatory region binding activity and transcription coactivator activity. Involved in adipose tissue development. Acts upstream of or within several processes, including cellular response to leukemia inhibitory factor; face morphogenesis; and gonad development. |
| 5_114456751 | 5 | 114456751 | 9.07E-07 | 114410000 | 114460000 | 0.1010 | ARID5B | Predicted to enable transcription cis-regulatory region binding activity and transcription coactivator activity. Involved in adipose tissue development. Acts upstream of or within several processes, including cellular response to leukemia inhibitory factor; face morphogenesis; and gonad development. |
| 5_54949941 | 5 | 54949941 | 1.90E-04 | 54930000 | 54980000 | 0.1009 | DIAPH3-ENSSCRG00010010592 | Enables actin binding activity; microtubule binding activity; and protein homodimerization activity. Involved in actin filament polymerization. Acts upstream of or within several processes, including autophagosome-lysosome fusion; cytoskeleton organization; and myeloid cell differentiation. |
| 6_62458342 | 6 | 62458342 | 1.85E-04 | 62440000 | 62490000 | 0.1006 | CARTPT | This gene encodes preproprotein isoforms that are processed into multiple biologically active peptides. Expression of this gene is regulated by cocaine and other drugs, and is associated with feeding/appetite and stress response. |
| 6_62469461 | 6 | 62469461 | 6.64E-05 | 62440000 | 62490000 | 0.1006 | CARTPT | This gene encodes preproprotein isoforms that are processed into multiple biologically active peptides. Expression of this gene is regulated by cocaine and other drugs, and is associated with feeding/appetite and stress response. |
| 6_62487584 | 6 | 62487584 | 4.39E-05 | 62440000 | 62490000 | 0.1006 | CARTPT | This gene encodes preproprotein isoforms that are processed into multiple biologically active peptides. Expression of this gene is regulated by cocaine and other drugs, and is associated with feeding/appetite and stress response. |
| 5_124095996 | 5 | 124095996 | 3.11E-04 | 124090000 | 124140000 | 0.0918 | PLA2G12B | Predicted to enable calcium ion binding activity and phospholipase A2 activity. |
| 6_74482024 | 6 | 74482024 | 2.45E-04 | 74480000 | 74530000 | 0.1004 | MEF2C-ENSSCRG00010006300 | Enables several functions, including DNA-binding transcription activator activity, RNA polymerase II-specific; HMG box domain binding activity; and histone deacetylase binding activity. Involved in several processes, including heart development; modulation of chemical synaptic transmission; and positive regulation of cell differentiation. |
| 8_21978473 | 8 | 21978473 | 8.99E-05 | 21970000 | 22020000 | 0.0976 | PLXNA4 | Enables semaphorin receptor activity. |
| 6_62650842 | 6 | 62650842 | 2.34E-05 | 62650000 | 62700000 | 0.1001 | ENSSCRG00010013781 | no annotation available |
| 2_7872826 | 2 | 7872826 | 1.53E-04 | 7870000 | 7920000 | 0.1000 | BCAS1 | Predicted to enable protein homodimerization activity. Involved in myelination. Predicted to be located in cytosol. Predicted to be active in synapse. |
| 8_35683664 | 8 | 35683664 | 5.06E-06 | 35650000 | 35700000 | 0.1000 | WNT2 | Predicted to enable cytokine activity and frizzled binding activity. Involved in cell proliferation in midbrain and positive regulation of neurogenesis. Acts upstream of or within several processes, including circulatory system development; lung induction; and positive regulation of cell population proliferation. |
| 2_6779897 | 2 | 6779897 | 2.59E-04 | 6770000 | 6820000 | 0.1000 | ENSSCRG00010005879-ENSSCRG00010005886 | no annotation available |
| 2_6785507 | 2 | 6785507 | 1.20E-04 | 6770000 | 6820000 | 0.1000 | ENSSCRG00010005879-ENSSCRG00010005886 | no annotation available |
| 6_58726388 | 6 | 58726388 | 1.64E-06 | 58720000 | 58770000 | 0.1067 | POC5 | Predicted to be involved in eye photoreceptor cell development. |
| 5_115087451 | 5 | 115087451 | 6.44E-06 | 115080000 | 115130000 | 0.0998 | EGR2 | Enables several functions, including DNA-binding transcription factor activity, RNA polymerase II-specific; RNA polymerase II cis-regulatory region sequence-specific DNA binding activity; and SUMO ligase activity. Involved in several processes, including nervous system development; protein export from nucleus; and regulation of nervous system development. |
| 2_9109188 | 2 | 9109188 | 6.60E-05 | 9100000 | 9150000 | 0.0998 | ENSSCRG00010006141-ZFP64 | Predicted to enable DNA-binding transcription factor activity, RNA polymerase II-specific; RNA polymerase II cis-regulatory region sequence-specific DNA binding activity; and identical protein binding activity. |
| 6_81101172 | 6 | 81101172 | 5.11E-05 | 81080000 | 81130000 | 0.0998 | CAST | This gene encodes an inhibitor of the calcium-dependent cysteine protease, calpain. This protein plays roles in multiple processes, including apoptosis, cell cycle regulation, and membrane fusion. |
| 6_77995562 | 6 | 77995562 | 7.49E-05 | 77980000 | 78030000 | 0.0998 | ENSSCRG00010006791-NR2F1 | Enables sequence-specific DNA binding activity. Acts upstream of or within nervous system development and regulation of DNA-templated transcription. |
| 5_33789469 | 5 | 33789469 | 3.24E-06 | 33740000 | 33790000 | 0.0974 | POSTN | This gene encodes a secreted extracellular matrix protein that functions in tissue development and regeneration, including wound healing and ventricular remodeling following myocardial infarction. |
| 8_38816009 | 8 | 38816009 | 6.64E-05 | 38790000 | 38840000 | 0.1278 | PPP1R3A-NIPA2 | Predicted to enable glycogen binding activity; protein phosphatase 1 binding activity; and protein serine/threonine phosphatase activity. |
| 1_114181475 | 1 | 114181475 | 1.39E-06 | 114180000 | 114230000 | 0.1322 | PRMT6-ENSSCRG00010001311 | Enables chromatin binding activity and histone H3R2 methyltransferase activity. |
| 8_85227122 | 8 | 85227122 | 1.06E-06 | 85220000 | 85270000 | 0.0995 | ENSSCRG00010013220-ENSSCRG00010013237 | no annotation available |
| 8_85266380 | 8 | 85266380 | 3.36E-06 | 85220000 | 85270000 | 0.0995 | ENSSCRG00010013237 | no annotation available |
| 8_25425800 | 8 | 25425800 | 4.57E-06 | 25390000 | 25440000 | 0.0939 | PRRT4 | Biased expression in ovary adult |
| 5_119135330 | 5 | 119135330 | 1.45E-05 | 119090000 | 119140000 | 0.0992 | CTNNA3 | Predicted to enable actin filament binding activity and beta-catenin binding activity. Involved in cell-cell adhesion. |
| 5_55110506 | 5 | 55110506 | 2.86E-04 | 55100000 | 55150000 | 0.0990 | ENSSCRG00010010592 | no annotation available |
| 6_62633635 | 6 | 62633635 | 4.36E-05 | 62620000 | 62670000 | 0.0989 | ENSSCRG00010013781 | no annotation available |
| 6_77917963 | 6 | 77917963 | 3.98E-05 | 77870000 | 77920000 | 0.0989 | ENSSCRG00010006791-NR2F1 | Enables sequence-specific DNA binding activity. Acts upstream of or within nervous system development and regulation of DNA-templated transcription. |
| 5_117881483 | 5 | 117881483 | 6.69E-06 | 117840000 | 117890000 | 0.0989 | CTNNA3 | Predicted to enable actin filament binding activity and beta-catenin binding activity. Involved in cell-cell adhesion. |
| 1_114827435 | 1 | 114827435 | 1.87E-05 | 114790000 | 114840000 | 0.0988 | ENSSCRG00010001324-ENSSCRG00010001333 | no annotation available |
| 5_59671142 | 5 | 59671142 | 1.90E-04 | 59660000 | 59710000 | 0.0988 | ENSSCRG00010010691-ENSSCRG00010010698 | no annotation available |
| 6_69799959 | 6 | 69799959 | 3.57E-04 | 69750000 | 69800000 | 0.0986 | EDIL3 | Predicted to enable calcium ion binding activity. Acts upstream of or within positive regulation of cell-substrate adhesion. |
| 6_76064498 | 6 | 76064498 | 9.66E-05 | 76020000 | 76070000 | 0.0986 | ADGRV1 | Enables several functions, including G-protein alpha-subunit binding activity; adenylate cyclase inhibitor activity; and myosin binding activity. Involved in several processes, including negative regulation of adenylate cyclase activity; positive regulation of bone mineralization; and self proteolysis. Acts upstream of or within several processes, including detection of mechanical stimulus involved in sensory perception of sound; inner ear receptor cell stereocilium organization; and positive regulation of cAMP/PKA signal transduction. |
| 5_117278172 | 5 | 117278172 | 1.43E-04 | 117230000 | 117280000 | 0.0985 | REEP3-ENSSCRG00010009059 | Predicted to enable microtubule binding activity. Predicted to be involved in endoplasmic reticulum tubular network organization and mitotic nuclear membrane reassembly. |
| 5_61822114 | 5 | 61822114 | 1.90E-04 | 61810000 | 61860000 | 0.0985 | ENSSCRG00010010776-ENSSCRG00010010786 | no annotation available |
| 6_65531429 | 6 | 65531429 | 8.37E-06 | 65490000 | 65540000 | 0.0984 | ENSSCRG00010005114 | no annotation available |
| 6_79534870 | 6 | 79534870 | 3.51E-06 | 79520000 | 79570000 | 0.0983 | MCTP1 | Predicted to enable calcium ion binding activity. Predicted to be involved in several processes, including negative regulation of endocytosis; negative regulation of response to oxidative stress; and regulation of neurotransmitter secretion |
| 6_79547966 | 6 | 79547966 | 5.69E-05 | 79520000 | 79570000 | 0.0983 | MCTP1 | Predicted to enable calcium ion binding activity. Predicted to be involved in several processes, including negative regulation of endocytosis; negative regulation of response to oxidative stress; and regulation of neurotransmitter secretion |
| 6_79567176 | 6 | 79567176 | 2.21E-06 | 79520000 | 79570000 | 0.0983 | MCTP1 | Predicted to enable calcium ion binding activity. Predicted to be involved in several processes, including negative regulation of endocytosis; negative regulation of response to oxidative stress; and regulation of neurotransmitter secretion |
| 5_34475134 | 5 | 34475134 | 2.95E-04 | 34470000 | 34520000 | 0.0983 | UFM1 | Involved in protein ufmylation and response to endoplasmic reticulum stress. |
| 2_8405679 | 2 | 8405679 | 8.29E-06 | 8360000 | 8410000 | 0.0983 | TSHZ2 | Predicted to enable DNA binding activity and DNA-binding transcription factor activity, RNA polymerase II-specific. Acts upstream of or within regulation of gene expression. |
| 2_8407649 | 2 | 8407649 | 1.42E-04 | 8360000 | 8410000 | 0.0983 | TSHZ2 | Predicted to enable DNA binding activity and DNA-binding transcription factor activity, RNA polymerase II-specific. Acts upstream of or within regulation of gene expression. |
| 1_122973332 | 1 | 122973332 | 8.42E-05 | 122930000 | 122980000 | 0.0983 | ENSSCRG00010002182 | no annotation available |
| 6_74611634 | 6 | 74611634 | 3.74E-04 | 74590000 | 74640000 | 0.0983 | MEF2C-ENSSCRG00010006300 | Enables several functions, including DNA-binding transcription activator activity, RNA polymerase II-specific; HMG box domain binding activity; and histone deacetylase binding activity. Involved in several processes, including heart development; modulation of chemical synaptic transmission; and positive regulation of cell differentiation. |
| 6_74622246 | 6 | 74622246 | 7.86E-05 | 74590000 | 74640000 | 0.0983 | MEF2C-ENSSCRG00010006300 | Enables several functions, including DNA-binding transcription activator activity, RNA polymerase II-specific; HMG box domain binding activity; and histone deacetylase binding activity. Involved in several processes, including heart development; modulation of chemical synaptic transmission; and positive regulation of cell differentiation. |
| 15_71033813 | 15 | 71033813 | 3.08E-04 | 71030000 | 71080000 | 0.0983 | CDH7 | This gene encodes a member of the cadherin family of calcium-dependent glycoproteins that mediate cell adhesion and regulate many morphogenetic events during development. |
| 8_24770429 | 8 | 24770429 | 1.83E-04 | 24760000 | 24810000 | 0.0982 | TPRKB | Predicted to enable protein kinase binding activity. Predicted to be involved in tRNA threonylcarbamoyladenosine modification. |
| 6_68086098 | 6 | 68086098 | 2.69E-05 | 68040000 | 68090000 | 0.0980 | Atp6ap1l-TMEM167A | Predicted to enable ATPase activator activity. Predicted to be involved in regulation of cellular pH. |
| 6_68088479 | 6 | 68088479 | 2.41E-05 | 68040000 | 68090000 | 0.0980 | Atp6ap1l-TMEM167A | Predicted to enable ATPase activator activity. Predicted to be involved in regulation of cellular pH. |
| 5_54928151 | 5 | 54928151 | 8.04E-06 | 54920000 | 54970000 | 0.0980 | DIAPH3-ENSSCRG00010010592 | Enables actin binding activity; microtubule binding activity; and protein homodimerization activity. Involved in actin filament polymerization. Acts upstream of or within several processes, including autophagosome-lysosome fusion; cytoskeleton organization; and myeloid cell differentiation. |
| 8_25444484 | 8 | 25444484 | 2.01E-05 | 25410000 | 25460000 | 0.0919 | PRRT4 | Biased expression in ovary adult |
| 8_39529970 | 8 | 39529970 | 2.87E-04 | 39520000 | 39570000 | 0.0978 | BMT2 | Predicted to enable S-adenosyl-L-methionine binding activity. Predicted to be involved in cellular response to amino acid starvation; cellular response to methionine; and regulation of TORC1 signaling. |
| 8_39532027 | 8 | 39532027 | 3.30E-04 | 39520000 | 39570000 | 0.0978 | BMT2 | Predicted to enable S-adenosyl-L-methionine binding activity. Predicted to be involved in cellular response to amino acid starvation; cellular response to methionine; and regulation of TORC1 signaling. |
| 11_54302337 | 11 | 54302337 | 2.83E-09 | 54300000 | 54350000 | 0.0977 | CCDC179 | Restricted expression toward testis |
| 8_25451512 | 8 | 25451512 | 6.22E-07 | 25410000 | 25460000 | 0.0919 | PRRT4 | Biased expression in ovary adult |
| 5_46109185 | 5 | 46109185 | 2.19E-05 | 46090000 | 46140000 | 0.0977 | ENSSCRG00010010063-TNFSF11 | Enables identical protein binding activity; receptor ligand activity; and tumor necrosis factor receptor superfamily binding activity. Involved in several processes, including intracellular signaling cassette; positive regulation of secretion by cell; and regulation of DNA-templated transcription. |
| 5_46130082 | 5 | 46130082 | 3.60E-04 | 46090000 | 46140000 | 0.0977 | TNFSF11 | This gene encodes a member of the tumor necrosis factor (TNF) cytokine family which is a ligand for osteoprotegerin and functions as a key factor for osteoclast differentiation and activation. |
| 6_131159731 | 6 | 131159731 | 1.32E-04 | 131110000 | 131160000 | 0.0976 | CPLX2-ENSSCRG00010023507 | Predicted to enable calcium-dependent protein binding activity and syntaxin-1 binding activity. Involved in positive regulation of synaptic plasticity and regulation of synaptic vesicle fusion to presynaptic active zone membrane. |
| 1_126340618 | 1 | 126340618 | 4.23E-05 | 126300000 | 126350000 | 0.1004 | PTBP2-ENSSCRG00010002655 | The protein encoded by this gene binds to intronic polypyrimidine clusters in pre-mRNA molecules and is implicated in controlling the assembly of other splicing-regulatory proteins. |
| 1_188330358 | 1 | 188330358 | 2.64E-04 | 188330000 | 188380000 | 0.1164 | PTPRU | Enables beta-catenin binding activity. |
| 5_117695893 | 5 | 117695893 | 1.03E-07 | 117690000 | 117740000 | 0.0976 | REEP3-ENSSCRG00010009059 | Predicted to enable microtubule binding activity. Predicted to be involved in endoplasmic reticulum tubular network organization and mitotic nuclear membrane reassembly. |
| 14_16489758 | 14 | 16489758 | 5.67E-06 | 16460000 | 16510000 | 0.0975 | ENSSCRG00010013548-TLR4 | This gene belongs to the evolutionarily-conserved Toll-like receptor family, whose members are type-1 transmembrane proteins that are involved in innate immunity. |
| 6_64517779 | 6 | 64517779 | 1.49E-04 | 64510000 | 64560000 | 0.0974 | ARSB | Enables N-acetylgalactosamine-6-sulfatase activity and arylsulfatase activity. Involved in dermatan sulfate catabolic process. Acts upstream of or within anterior head development. |
| 6_64533486 | 6 | 64533486 | 1.03E-04 | 64510000 | 64560000 | 0.0974 | ARSB | Enables N-acetylgalactosamine-6-sulfatase activity and arylsulfatase activity. Involved in dermatan sulfate catabolic process. Acts upstream of or within anterior head development. |
| 6_64550044 | 6 | 64550044 | 7.55E-06 | 64510000 | 64560000 | 0.0974 | ARSB | Enables N-acetylgalactosamine-6-sulfatase activity and arylsulfatase activity. Involved in dermatan sulfate catabolic process. Acts upstream of or within anterior head development. |
| 8_51591383 | 8 | 51591383 | 2.00E-15 | 51580000 | 51630000 | 0.1053 | Pttg1ip2 | Predicted to be involved in protein import into nucleus. |
| 8_51613637 | 8 | 51613637 | 8.70E-31 | 51580000 | 51630000 | 0.1053 | Pttg1ip2 | Predicted to be involved in protein import into nucleus. |
| 8_35272939 | 8 | 35272939 | 1.95E-05 | 35270000 | 35320000 | 0.0974 | CTTNBP2 | Predicted to enable SH3 domain binding activity and cytoskeletal regulatory protein binding activity. Predicted to be involved in regulation of modification of postsynaptic actin cytoskeleton. |
| 1_53009882 | 1 | 53009882 | 2.72E-06 | 52960000 | 53010000 | 0.1124 | RALYL-ENSSCRG00010002482 | Predicted to enable RNA binding activity and identical protein binding activity. |
| 5_124147299 | 5 | 124147299 | 4.82E-05 | 124110000 | 124160000 | 0.0941 | RBIS | Predicted to be involved in ribosome biogenesis. |
| 6_80323382 | 6 | 80323382 | 1.26E-04 | 80290000 | 80340000 | 0.1309 | RHOBTB3 | Predicted to enable ATP binding activity; ATP hydrolysis activity; and enzyme binding activity. |
| 4_128243686 | 4 | 128243686 | 1.60E-04 | 128240000 | 128290000 | 0.1096 | rpl35a | A structural constituent of ribosome. |
| 6_72733720 | 6 | 72733720 | 3.09E-04 | 72730000 | 72780000 | 0.0971 | CCNH-TMEM161B | Enables kinase activity. Predicted to be involved in several processes, including protein stabilization; regulation of G1/S transition of mitotic cell cycle; and transcription initiation at RNA polymerase II promoter. |
| 6_77541086 | 6 | 77541086 | 1.49E-04 | 77530000 | 77580000 | 0.0969 | ENSSCRG00010006791-NR2F1 | Enables sequence-specific DNA binding activity. Acts upstream of or within nervous system development and regulation of DNA-templated transcription. |
| 8_44750521 | 8 | 44750521 | 2.06E-14 | 44710000 | 44760000 | 0.0969 | COL28A1 | Predicted to enable heparin binding activity. Predicted to be an extracellular matrix structural constituent conferring tensile strength. Predicted to be involved in cell adhesion and collagen fibril organization. |
| 8_44755622 | 8 | 44755622 | 1.53E-04 | 44710000 | 44760000 | 0.0969 | COL28A1 | Predicted to enable heparin binding activity. Predicted to be an extracellular matrix structural constituent conferring tensile strength. Predicted to be involved in cell adhesion and collagen fibril organization. |
| 6_83341804 | 6 | 83341804 | 9.36E-06 | 83300000 | 83350000 | 0.0969 | CHD1-ADIPOR1 | Predicted to enable several functions, including ATP hydrolysis activity; ATP-dependent chromatin remodeler activity; and methylated histone binding activity. |
| 3_29632773 | 3 | 29632773 | 1.36E-04 | 29630000 | 29680000 | 0.1297 | rpl37-TOM1L1 | A structural constituent of ribosome. |
| 1_120308116 | 1 | 120308116 | 1.83E-05 | 120300000 | 120350000 | 0.0974 | RTCA | Predicted to enable RNA-3'-phosphate cyclase activity. |
| 2_118278815 | 2 | 118278815 | 2.73E-05 | 118260000 | 118310000 | 0.0942 | RYR3 | The protein encoded by this gene is a ryanodine receptor, which functions to release calcium from intracellular storage for use in many cellular processes. |
| 14_17822783 | 14 | 17822783 | 2.09E-04 | 17820000 | 17870000 | 0.0965 | TRIM32 | Enables several functions, including identical protein binding activity; translation initiation factor binding activity; and ubiquitin protein ligase activity. Involved in several processes, including positive regulation of NF-kappaB transcription factor activity; positive regulation of cell differentiation; and response to tumor necrosis factor. |
| 14_17826251 | 14 | 17826251 | 6.53E-05 | 17820000 | 17870000 | 0.0965 | TRIM32 | Enables several functions, including identical protein binding activity; translation initiation factor binding activity; and ubiquitin protein ligase activity. Involved in several processes, including positive regulation of NF-kappaB transcription factor activity; positive regulation of cell differentiation; and response to tumor necrosis factor. |
| 6_57449633 | 6 | 57449633 | 1.08E-04 | 57400000 | 57450000 | 0.0963 | ENSSCRG00010011925 | no annotation available |
| 9_61109177 | 9 | 61109177 | 3.28E-04 | 61060000 | 61110000 | 0.0963 | UTS2B | Predicted to enable G protein-coupled receptor binding activity. Predicted to be involved in regulation of blood pressure. |
| 14_41833504 | 14 | 41833504 | 1.03E-06 | 41830000 | 41880000 | 0.0962 | ENSSCRG00010014978-ENSSCRG00010014982 | no annotation available |
| 6_78763726 | 6 | 78763726 | 2.21E-06 | 78760000 | 78810000 | 0.0962 | FAM172A | Predicted to contribute to siRNA binding activity. Involved in neural crest cell development and regulation of alternative mRNA splicing, via spliceosome. |
| 9_118844483 | 9 | 118844483 | 1.87E-05 | 118830000 | 118880000 | 0.0961 | ENSSCRG00010013911-NCAM2 | Predicted to enable identical protein binding activity. Predicted to be involved in axonal fasciculation and cell adhesion. |
| 9_118876956 | 9 | 118876956 | 9.24E-07 | 118830000 | 118880000 | 0.0961 | ENSSCRG00010013911-NCAM2 | Predicted to enable identical protein binding activity. Predicted to be involved in axonal fasciculation and cell adhesion. |
| 6_70352333 | 6 | 70352333 | 3.57E-04 | 70340000 | 70390000 | 0.0959 | EDIL3-ENSSCRG00010005906 | Predicted to enable calcium ion binding activity. Acts upstream of or within positive regulation of cell-substrate adhesion. |
| 8_84620935 | 8 | 84620935 | 2.46E-09 | 84620000 | 84670000 | 0.0958 | CYCS | Enables heme binding activity. Acts upstream of or within activation of cysteine-type endopeptidase activity involved in apoptotic process by cytochrome c; apoptotic process; and hydrogen peroxide metabolic process. |
| 17_942014 | 17 | 942014 | 1.01E-06 | 900000 | 950000 | 0.1126 | SCAMP4 | Predicted to be involved in protein transport. |
| 14_17817254 | 14 | 17817254 | 2.02E-09 | 17810000 | 17860000 | 0.0957 | TRIM32 | Enables several functions, including identical protein binding activity; translation initiation factor binding activity; and ubiquitin protein ligase activity. Involved in several processes, including positive regulation of NF-kappaB transcription factor activity; positive regulation of cell differentiation; and response to tumor necrosis factor. |
| 5_38184146 | 5 | 38184146 | 1.60E-10 | 38170000 | 38220000 | 0.0957 | ENSSCRG00010005848-ENSSCRG00010005854 | no annotation available |
| 6_77130099 | 6 | 77130099 | 2.21E-06 | 77090000 | 77140000 | 0.0957 | ENSSCRG00010006791-NR2F1 | Enables sequence-specific DNA binding activity. Acts upstream of or within nervous system development and regulation of DNA-templated transcription. |
| 17_942485 | 17 | 942485 | 4.84E-05 | 900000 | 950000 | 0.1126 | SCAMP4 | Predicted to be involved in protein transport. |
| 5_65154787 | 5 | 65154787 | 2.38E-04 | 65150000 | 65200000 | 0.0956 | ENSSCRG00010010958-ENSSCRG00010010968 | no annotation available |
| 5_61796062 | 5 | 61796062 | 1.90E-04 | 61790000 | 61840000 | 0.0954 | ENSSCRG00010010776-ENSSCRG00010010786 | no annotation available |
| 2_8419920 | 2 | 8419920 | 1.25E-06 | 8410000 | 8460000 | 0.0954 | TSHZ2 | Predicted to enable DNA binding activity and DNA-binding transcription factor activity, RNA polymerase II-specific. Acts upstream of or within regulation of gene expression. |
| 14_39577866 | 14 | 39577866 | 1.00E-04 | 39570000 | 39620000 | 0.0953 | ACO1 | This gene encodes a member of the aconitase/IPM isomerase protein family. Disruption of this gene is associated with pulmonary hypertension and polycythemia. |
| 5_32722125 | 5 | 32722125 | 1.31E-05 | 32720000 | 32770000 | 0.0952 | CCNA1-SERTM1 | Predicted to enable cyclin-dependent protein serine/threonine kinase regulator activity. Predicted to be involved in G1/S transition of mitotic cell cycle. |
| 5_117901902 | 5 | 117901902 | 2.36E-07 | 117860000 | 117910000 | 0.0952 | CTNNA3 | Predicted to enable actin filament binding activity and beta-catenin binding activity. Involved in cell-cell adhesion. |
| 6_78099586 | 6 | 78099586 | 4.05E-05 | 78050000 | 78100000 | 0.0952 | ENSSCRG00010006791-NR2F1 | Enables sequence-specific DNA binding activity. Acts upstream of or within nervous system development and regulation of DNA-templated transcription. |
| 9_65365093 | 9 | 65365093 | 1.77E-06 | 65360000 | 65410000 | 0.0951 | DLG1 | Enables molecular adaptor activity and potassium channel regulator activity. A structural constituent of postsynaptic density. Involved in several processes, including membrane repolarization during ventricular cardiac muscle cell action potential; neurotransmitter receptor localization to postsynaptic specialization membrane; and regulation of potassium ion transmembrane transport. |
| 9_65385003 | 9 | 65385003 | 1.12E-07 | 65360000 | 65410000 | 0.0951 | DLG1 | Enables molecular adaptor activity and potassium channel regulator activity. A structural constituent of postsynaptic density. Involved in several processes, including membrane repolarization during ventricular cardiac muscle cell action potential; neurotransmitter receptor localization to postsynaptic specialization membrane; and regulation of potassium ion transmembrane transport. |
| 9_65402686 | 9 | 65402686 | 4.31E-06 | 65360000 | 65410000 | 0.0951 | DLG1 | Enables molecular adaptor activity and potassium channel regulator activity. A structural constituent of postsynaptic density. Involved in several processes, including membrane repolarization during ventricular cardiac muscle cell action potential; neurotransmitter receptor localization to postsynaptic specialization membrane; and regulation of potassium ion transmembrane transport. |
| 9_128374541 | 9 | 128374541 | 3.92E-06 | 128370000 | 128420000 | 0.0951 | ENSSCRG00010009265 | no annotation available |
| 6_74840382 | 6 | 74840382 | 1.40E-04 | 74800000 | 74850000 | 0.0948 | ENSSCRG00010006300-CETN3 | Enables G-protein beta/gamma-subunit complex binding activity and microtubule binding activity. Predicted to be involved in microtubule cytoskeleton organization. |
| 14_43273195 | 14 | 43273195 | 1.44E-04 | 43270000 | 43320000 | 0.0947 | ENSSCRG00010014998-LINGO2 | Acts upstream of or within positive regulation of synapse assembly. Predicted to be located in glutamatergic synapse and synaptic membrane. |
| 4_102607518 | 4 | 102607518 | 2.50E-08 | 102580000 | 102630000 | 0.0946 | ENSSCRG00010004174 | no annotation available |
| 8_45988242 | 8 | 45988242 | 1.31E-07 | 45980000 | 46030000 | 0.0944 | sem1 | Acts upstream of or within double-strand break repair via homologous recombination. |
| 5_124358804 | 5 | 124358804 | 3.74E-06 | 124310000 | 124360000 | 0.0944 | ECD | Predicted to enable histone acetyltransferase binding activity. |
| 8_46008023 | 8 | 46008023 | 3.54E-10 | 45980000 | 46030000 | 0.0944 | sem1 | Acts upstream of or within double-strand break repair via homologous recombination. |
| 8_46023591 | 8 | 46023591 | 1.80E-06 | 45980000 | 46030000 | 0.0944 | sem1 | Acts upstream of or within double-strand break repair via homologous recombination. |
| 5_44713732 | 5 | 44713732 | 1.93E-04 | 44710000 | 44760000 | 0.1064 | SERP2-lacc1 | Predicted to be involved in endoplasmic reticulum unfolded protein response. |
| 15_70057471 | 15 | 70057471 | 2.47E-04 | 70050000 | 70100000 | 0.0920 | SERPINB8-ENSSCRG00010018793 | The protein encoded by this gene is a member of the ov-serpin family of serine protease inhibitors. |
| 5_32847358 | 5 | 32847358 | 1.78E-05 | 32840000 | 32890000 | 0.1340 | SERTM1 | Biased expression in brain |
| 5_32798596 | 5 | 32798596 | 1.50E-04 | 32770000 | 32820000 | 0.1095 | SERTM1 | Biased expression in brain |
| 5_50819803 | 5 | 50819803 | 1.27E-05 | 50800000 | 50850000 | 0.0943 | ENSSCRG00010010401-ENSSCRG00010010405 | no annotation available |
| 6_79140666 | 6 | 79140666 | 2.11E-04 | 79140000 | 79190000 | 0.1182 | SLF1 | Enables ubiquitin protein ligase binding activity. Involved in DNA damage response. |
| 4_103927408 | 4 | 103927408 | 1.55E-04 | 103900000 | 103950000 | 0.0942 | ENSSCRG00010004278 | no annotation available |
| 5_32973953 | 5 | 32973953 | 8.88E-05 | 32960000 | 33010000 | 0.1346 | SMAD9 | This gene encodes a member of a family of proteins that act as downstream effectors of the bone morphogenetic protein (BMP) signaling pathway. |
| 10_101637037 | 10 | 101637037 | 3.71E-04 | 101610000 | 101660000 | 0.0941 | CORIN | Enables serine-type endopeptidase activity. Involved in several processes, including peptide hormone processing; regulation of renal sodium excretion; and regulation of systemic arterial blood pressure by atrial natriuretic peptide. |
| 5_110636298 | 5 | 110636298 | 6.77E-05 | 110620000 | 110670000 | 0.0941 | ENSSCRG00010006416 | no annotation available |
| 5_110639791 | 5 | 110639791 | 1.69E-06 | 110620000 | 110670000 | 0.0941 | ENSSCRG00010006416 | no annotation available |
| 5_33005118 | 5 | 33005118 | 7.58E-08 | 32960000 | 33010000 | 0.1346 | SMAD9 | This gene encodes a member of a family of proteins that act as downstream effectors of the bone morphogenetic protein (BMP) signaling pathway. |
| 8_83273956 | 8 | 83273956 | 4.57E-06 | 83270000 | 83320000 | 0.0941 | CCDC126 | Predicted to be located in extracellular region. Is expressed in several structures, including intestine; liver; metanephros; retina nuclear layer; and skeletal muscle. |
| 8_39410218 | 8 | 39410218 | 1.02E-04 | 39410000 | 39460000 | 0.1046 | SMIM30 | Involved in negative regulation of type I interferon-mediated signaling pathway. |
| 1_122980922 | 1 | 122980922 | 5.12E-05 | 122940000 | 122990000 | 0.0939 | ENSSCRG00010002182 | no annotation available |
| 8_39413682 | 8 | 39413682 | 3.27E-04 | 39410000 | 39460000 | 0.1046 | SMIM30 | Involved in negative regulation of type I interferon-mediated signaling pathway. |
| 9_65418057 | 9 | 65418057 | 1.77E-06 | 65380000 | 65430000 | 0.0938 | DLG1 | Enables molecular adaptor activity and potassium channel regulator activity. A structural constituent of postsynaptic density. Involved in several processes, including membrane repolarization during ventricular cardiac muscle cell action potential; neurotransmitter receptor localization to postsynaptic specialization membrane; and regulation of potassium ion transmembrane transport. |
| 6_78212334 | 6 | 78212334 | 2.34E-04 | 78170000 | 78220000 | 0.0938 | FAM172A | Predicted to contribute to siRNA binding activity. Involved in neural crest cell development and regulation of alternative mRNA splicing, via spliceosome. |
| 6_67286835 | 6 | 67286835 | 4.73E-05 | 67270000 | 67320000 | 0.0938 | SSBP2-ATG10 | Predicted to enable single-stranded DNA binding activity. Predicted to be involved in positive regulation of transcription by RNA polymerase II. |
| 1_82772139 | 1 | 82772139 | 3.96E-05 | 82750000 | 82800000 | 0.0937 | ADGRA2-SNTG1 | Predicted to enable G protein-coupled receptor activity. Involved in several processes, including positive regulation of canonical Wnt signaling pathway; regulation of establishment of blood-brain barrier; and sprouting angiogenesis. Acts upstream of or within angiogenesis |
| 1_82773172 | 1 | 82773172 | 1.17E-04 | 82750000 | 82800000 | 0.0937 | ADGRA2-SNTG1 | Predicted to enable G protein-coupled receptor activity. Involved in several processes, including positive regulation of canonical Wnt signaling pathway; regulation of establishment of blood-brain barrier; and sprouting angiogenesis. Acts upstream of or within angiogenesis |
| 1_82784856 | 1 | 82784856 | 7.08E-05 | 82750000 | 82800000 | 0.0937 | ADGRA2-SNTG1 | Predicted to enable G protein-coupled receptor activity. Involved in several processes, including positive regulation of canonical Wnt signaling pathway; regulation of establishment of blood-brain barrier; and sprouting angiogenesis. Acts upstream of or within angiogenesis |
| 1_82799220 | 1 | 82799220 | 5.56E-05 | 82750000 | 82800000 | 0.0937 | ADGRA2-SNTG1 | Predicted to enable G protein-coupled receptor activity. Involved in several processes, including positive regulation of canonical Wnt signaling pathway; regulation of establishment of blood-brain barrier; and sprouting angiogenesis. Acts upstream of or within angiogenesis |
| 8_39418144 | 8 | 39418144 | 1.97E-04 | 39410000 | 39460000 | 0.1046 | SMIM30 | Involved in negative regulation of type I interferon-mediated signaling pathway. |
| 5_157487365 | 5 | 157487365 | 1.20E-09 | 157440000 | 157490000 | 0.0936 | ENSSCRG00010014580 | no annotation available |
| 5_157440670 | 5 | 157440670 | 1.13E-05 | 157440000 | 157490000 | 0.0936 | TXN | Enables protein-disulfide reductase activity. Acts upstream of or within cell redox homeostasis; negative regulation of protein export from nucleus; and negative regulation of transcription by RNA polymerase II. |
| 6_70671353 | 6 | 70671353 | 6.08E-05 | 70640000 | 70690000 | 0.0935 | EDIL3-ENSSCRG00010005906 | Predicted to enable calcium ion binding activity. Acts upstream of or within positive regulation of cell-substrate adhesion. |
| 1_122913636 | 1 | 122913636 | 1.10E-04 | 122910000 | 122960000 | 0.0934 | ENSSCRG00010002167-ENSSCRG00010002182 | no annotation available |
| 8_51632599 | 8 | 51632599 | 2.94E-31 | 51590000 | 51640000 | 0.0934 | CLDN12 | This gene encodes a member of the claudin family. Claudins are integral membrane proteins and components of tight junction strands. |
| 5_55088431 | 5 | 55088431 | 2.41E-04 | 55080000 | 55130000 | 0.0934 | DIAPH3-ENSSCRG00010010592 | Enables actin binding activity; microtubule binding activity; and protein homodimerization activity. Involved in actin filament polymerization. Acts upstream of or within several processes, including autophagosome-lysosome fusion; cytoskeleton organization; and myeloid cell differentiation. |
| 11_120474090 | 11 | 120474090 | 2.59E-04 | 120470000 | 120520000 | 0.0957 | SORL1 | Enables aspartic-type endopeptidase inhibitor activity. Involved in several processes, including diet induced thermogenesis; establishment of protein localization; and regulation of signal transduction. |
| 11_120532107 | 11 | 120532107 | 1.02E-04 | 120490000 | 120540000 | 0.0921 | SORL1 | Enables aspartic-type endopeptidase inhibitor activity. Involved in several processes, including diet induced thermogenesis; establishment of protein localization; and regulation of signal transduction. |
| 5_65995065 | 5 | 65995065 | 6.71E-05 | 65980000 | 66030000 | 0.0933 | DACH1 | Enables DNA-binding transcription factor activity, RNA polymerase II-specific. Involved in regulation of nuclear cell cycle DNA replication. |
| 11_77359203 | 11 | 77359203 | 2.54E-04 | 77310000 | 77360000 | 0.1172 | SPCS2 | Predicted to be involved in protein targeting to ER and signal peptide processing. |
| 6_77308502 | 6 | 77308502 | 3.67E-04 | 77260000 | 77310000 | 0.0932 | ENSSCRG00010006791-NR2F1 | Enables sequence-specific DNA binding activity. Acts upstream of or within nervous system development and regulation of DNA-templated transcription. |
| 6_77323647 | 6 | 77323647 | 1.13E-05 | 77280000 | 77330000 | 0.0931 | ENSSCRG00010006791-NR2F1 | Enables sequence-specific DNA binding activity. Acts upstream of or within nervous system development and regulation of DNA-templated transcription. |
| 11_77361684 | 11 | 77361684 | 1.66E-04 | 77320000 | 77370000 | 0.0971 | SPCS2 | Predicted to be involved in protein targeting to ER and signal peptide processing. |
| 6_59360499 | 6 | 59360499 | 8.16E-05 | 59350000 | 59400000 | 0.0931 | GCNT4 | Predicted to enable acetylglucosaminyltransferase activity. Acts upstream of or within several processes, including inter-male aggressive behavior; neutrophil homeostasis; and thyroid hormone metabolic process. |
| 6_59382968 | 6 | 59382968 | 4.05E-06 | 59350000 | 59400000 | 0.0931 | GCNT4 | Predicted to enable acetylglucosaminyltransferase activity. Acts upstream of or within several processes, including inter-male aggressive behavior; neutrophil homeostasis; and thyroid hormone metabolic process. |
| 6_59392599 | 6 | 59392599 | 4.53E-05 | 59350000 | 59400000 | 0.0931 | GCNT4 | Predicted to enable acetylglucosaminyltransferase activity. Acts upstream of or within several processes, including inter-male aggressive behavior; neutrophil homeostasis; and thyroid hormone metabolic process. |
| 6_59396388 | 6 | 59396388 | 5.28E-06 | 59350000 | 59400000 | 0.0931 | GCNT4 | Predicted to enable acetylglucosaminyltransferase activity. Acts upstream of or within several processes, including inter-male aggressive behavior; neutrophil homeostasis; and thyroid hormone metabolic process. |
| 1_70575956 | 1 | 70575956 | 2.51E-04 | 70530000 | 70580000 | 0.0930 | ENSSCRG00010007610-YTHDF3 | Predicted to enable N6-methyladenosine-containing RNA reader activity; mRNA binding activity; and ribosome binding activity. Involved in mRNA destabilization and negative regulation of type I interferon-mediated signaling pathway. |
| 8_35443280 | 8 | 35443280 | 6.82E-05 | 35420000 | 35470000 | 0.0930 | CFTR | The membrane-associated protein encoded by this gene is a member of the superfamily of ATP-binding cassette (ABC) transporters. |
| 8_35459579 | 8 | 35459579 | 1.55E-04 | 35420000 | 35470000 | 0.0930 | CFTR | The membrane-associated protein encoded by this gene is a member of the superfamily of ATP-binding cassette (ABC) transporters. |
| 6_117185201 | 6 | 117185201 | 2.36E-04 | 117180000 | 117230000 | 0.1109 | SRFBP1 | Predicted to be involved in maturation of SSU-rRNA. |
| 5_36154887 | 5 | 36154887 | 4.80E-05 | 36110000 | 36160000 | 0.0929 | ENSSCRG00010005295-FOXO1 | Enables several functions, including DNA binding activity; DNA-binding transcription factor activity, RNA polymerase II-specific; and promoter-specific chromatin binding activity. Involved in several processes, including cellular response to nitric oxide; negative regulation of fat cell differentiation; and negative regulation of insulin secretion. |
| 5_111278831 | 5 | 111278831 | 3.63E-08 | 111230000 | 111280000 | 0.0929 | ENSSCRG00010006594 | no annotation available |
| 14_17805979 | 14 | 17805979 | 3.35E-04 | 17800000 | 17850000 | 0.0929 | TRIM32 | Enables several functions, including identical protein binding activity; translation initiation factor binding activity; and ubiquitin protein ligase activity. Involved in several processes, including positive regulation of NF-kappaB transcription factor activity; positive regulation of cell differentiation; and response to tumor necrosis factor. |
| 17_23417857 | 17 | 23417857 | 3.03E-04 | 23370000 | 23420000 | 0.0928 | CDC123 | Predicted to enable ATP binding activity; magnesium ion binding activity; and protein folding chaperone. Predicted to be involved in eukaryotic translation initiation factor 2 complex assembly. |
| 5_62901017 | 5 | 62901017 | 1.90E-04 | 62870000 | 62920000 | 0.0928 | ENSSCRG00010010786 | no annotation available |
| 11_54334694 | 11 | 54334694 | 1.11E-04 | 54300000 | 54350000 | 0.0977 | SVIP | Predicted to enable ATPase binding activity. |
| 8_86862360 | 8 | 86862360 | 3.38E-05 | 86860000 | 86910000 | 0.0943 | TAX1BP1 | Enables kinase binding activity. Involved in negative regulation of NF-kappaB transcription factor activity. |
| 1_115407164 | 1 | 115407164 | 9.97E-05 | 115400000 | 115450000 | 0.0927 | ENSSCRG00010001324-ENSSCRG00010001333 | no annotation available |
| 6_130933867 | 6 | 130933867 | 2.66E-06 | 130930000 | 130980000 | 0.0927 | ENSSCRG00010023395 | no annotation available |
| 11_134576079 | 11 | 134576079 | 8.92E-05 | 134570000 | 134620000 | 0.0926 | B3GAT1-CHR_END | Enables galactosylgalactosylxylosylprotein 3-beta-glucuronosyltransferase activity. Involved in glycosaminoglycan biosynthetic process. |
| 11_134594446 | 11 | 134594446 | 5.49E-07 | 134570000 | 134620000 | 0.0926 | B3GAT1-CHR_END | Enables galactosylgalactosylxylosylprotein 3-beta-glucuronosyltransferase activity. Involved in glycosaminoglycan biosynthetic process. |
| 5_121164749 | 5 | 121164749 | 1.47E-08 | 121120000 | 121170000 | 0.0925 | TSPAN15 | Enables enzyme binding activity. Involved in protein maturation. |
| 6_109463437 | 6 | 109463437 | 2.89E-05 | 109450000 | 109500000 | 0.0925 | ENSSCRG00010007340-CHSY3 | Enables N-acetylgalactosaminyl-proteoglycan 3-beta-glucuronosyltransferase activity and glucuronosyl-N-acetylgalactosaminyl-proteoglycan 4-beta-N-acetylgalactosaminyltransferase activity. Involved in chondroitin sulfate biosynthetic process. |
| 6_75694971 | 6 | 75694971 | 2.71E-04 | 75690000 | 75740000 | 0.0925 | ADGRV1 | Enables several functions, including G-protein alpha-subunit binding activity; adenylate cyclase inhibitor activity; and myosin binding activity. Involved in several processes, including negative regulation of adenylate cyclase activity; positive regulation of bone mineralization; and self proteolysis. Acts upstream of or within several processes, including detection of mechanical stimulus involved in sensory perception of sound; inner ear receptor cell stereocilium organization; and positive regulation of cAMP/PKA signal transduction. |
| 6_71130623 | 6 | 71130623 | 1.78E-04 | 71090000 | 71140000 | 0.0924 | ENSSCRG00010005906-COX7C | Predicted to be involved in mitochondrial electron transport, cytochrome c to oxygen. |
| 6_71132385 | 6 | 71132385 | 1.53E-04 | 71090000 | 71140000 | 0.0924 | ENSSCRG00010005906-COX7C | Predicted to be involved in mitochondrial electron transport, cytochrome c to oxygen. |
| 6_75963863 | 6 | 75963863 | 1.71E-06 | 75960000 | 76010000 | 0.0922 | ADGRV1 | Enables several functions, including G-protein alpha-subunit binding activity; adenylate cyclase inhibitor activity; and myosin binding activity. Involved in several processes, including negative regulation of adenylate cyclase activity; positive regulation of bone mineralization; and self proteolysis. Acts upstream of or within several processes, including detection of mechanical stimulus involved in sensory perception of sound; inner ear receptor cell stereocilium organization; and positive regulation of cAMP/PKA signal transduction. |
| 6_64986459 | 6 | 64986459 | 3.62E-05 | 64940000 | 64990000 | 0.0922 | ENSSCRG00010005003 | no annotation available |
| 5_63700842 | 5 | 63700842 | 2.90E-04 | 63660000 | 63710000 | 0.1245 | TDRD3-ENSSCRG00010010876 | Predicted to enable chromatin binding activity; methylated histone binding activity; and transcription coactivator activity. |
| 1_116022481 | 1 | 116022481 | 3.66E-05 | 115980000 | 116030000 | 0.1070 | TEX38 | Biased expression in testis adult |
| 5_10715537 | 5 | 10715537 | 1.81E-05 | 10670000 | 10720000 | 0.0922 | TMTC4 | Predicted to enable ATPase binding activity and dolichyl-phosphate-mannose-protein mannosyltransferase activity. Acts upstream of or within several processes, including endoplasmic reticulum unfolded protein response; outer hair cell apoptotic process; and positive regulation of endoplasmic reticulum calcium ion concentration. |
| 5_63013164 | 5 | 63013164 | 1.90E-04 | 62990000 | 63040000 | 0.0922 | ENSSCRG00010010786-CENPQ | Predicted to be involved in metaphase chromosome alignment and positive regulation of protein localization to kinetochore. |
| 1_59154791 | 1 | 59154791 | 1.21E-04 | 59140000 | 59190000 | 0.0994 | ZFHX4-HNF4G | Predicted to enable DNA-binding transcription factor activity, RNA polymerase II-specific and RNA polymerase II cis-regulatory region sequence-specific DNA binding activity. |
| 6_105491068 | 6 | 105491068 | 1.05E-04 | 105490000 | 105540000 | 0.0921 | DPYSL3 | This gene encodes a protein that belongs to the TUC (TOAD-64/Ulip/CRMP) family of proteins. Members of this family are phosphoproteins that function in axonal guidance and neuronal differentiation during development and regeneration of the nervous system. |
| 6_105496373 | 6 | 105496373 | 5.87E-05 | 105490000 | 105540000 | 0.0921 | ENSSCRG00010008340 | no annotation available |
| 8_89135402 | 8 | 89135402 | 6.70E-08 | 89130000 | 89180000 | 0.0921 | ENSSCRG00010014097-ZNRF2 | Predicted to enable ubiquitin protein ligase activity. Predicted to be involved in proteasome-mediated ubiquitin-dependent protein catabolic process and protein K48-linked ubiquitination. |
| 7_108960394 | 7 | 108960394 | 2.26E-04 | 108960000 | 109010000 | 0.0920 | TNFRSF21 | Involved in several processes, including negative regulation of cytokine production; negative regulation of lymphocyte proliferation; and oligodendrocyte apoptotic process. |
| 7_108960944 | 7 | 108960944 | 3.45E-04 | 108960000 | 109010000 | 0.0920 | TNFRSF21 | Involved in several processes, including negative regulation of cytokine production; negative regulation of lymphocyte proliferation; and oligodendrocyte apoptotic process. |
| 7_108979888 | 7 | 108979888 | 1.90E-04 | 108960000 | 109010000 | 0.0920 | TNFRSF21 | Involved in several processes, including negative regulation of cytokine production; negative regulation of lymphocyte proliferation; and oligodendrocyte apoptotic process. |
| 7_108994306 | 7 | 108994306 | 1.89E-05 | 108960000 | 109010000 | 0.0920 | TNFRSF21 | Involved in several processes, including negative regulation of cytokine production; negative regulation of lymphocyte proliferation; and oligodendrocyte apoptotic process. |
| 5_34677561 | 5 | 34677561 | 7.18E-05 | 34670000 | 34720000 | 0.0920 | UFM1-FREM2 | Involved in protein ufmylation and response to endoplasmic reticulum stress. |
| 9_10605367 | 9 | 10605367 | 4.30E-05 | 10580000 | 10630000 | 0.1040 | ZIC4-PLSCR5 | This gene encodes a member of the ZIC family of C2H2-type zinc finger proteins. |
| 5_50891152 | 5 | 50891152 | 3.16E-04 | 50890000 | 50940000 | 0.0920 | ENSSCRG00010010401-ENSSCRG00010010405 | no annotation available |
| 6_77349623 | 6 | 77349623 | 3.37E-05 | 77340000 | 77390000 | 0.0919 | ENSSCRG00010006791-NR2F1 | Enables sequence-specific DNA binding activity. Acts upstream of or within nervous system development and regulation of DNA-templated transcription. |
| 6_77362782 | 6 | 77362782 | 2.00E-04 | 77340000 | 77390000 | 0.0919 | ENSSCRG00010006791-NR2F1 | Enables sequence-specific DNA binding activity. Acts upstream of or within nervous system development and regulation of DNA-templated transcription. |
| 4_103868179 | 4 | 103868179 | 2.57E-04 | 103860000 | 103910000 | 0.0919 | ENSSCRG00010004278 | no annotation available |
| 9_10619438 | 9 | 10619438 | 9.27E-09 | 10580000 | 10630000 | 0.1040 | ZIC4-PLSCR5 | This gene encodes a member of the ZIC family of C2H2-type zinc finger proteins. |
| 9_10620925 | 9 | 10620925 | 1.02E-04 | 10580000 | 10630000 | 0.1040 | ZIC4-PLSCR5 | This gene encodes a member of the ZIC family of C2H2-type zinc finger proteins. |
| 2_8140738 | 2 | 8140738 | 3.70E-04 | 8100000 | 8150000 | 0.1054 | ZNF217 | Predicted to enable DNA-binding transcription repressor activity, RNA polymerase II-specific and RNA polymerase II cis-regulatory region sequence-specific DNA binding activity. |
| 6_74969837 | 6 | 74969837 | 3.30E-04 | 74950000 | 75000000 | 0.0918 | ENSSCRG00010006300-CETN3 | Enables G-protein beta/gamma-subunit complex binding activity and microtubule binding activity. Predicted to be involved in microtubule cytoskeleton organization. |
| 6_70701693 | 6 | 70701693 | 1.52E-05 | 70660000 | 70710000 | 0.0916 | ENSSCRG00010005906 | no annotation available |
| 11_134107168 | 11 | 134107168 | 9.57E-08 | 134100000 | 134150000 | 0.0916 | B3GAT1 | Enables galactosylgalactosylxylosylprotein 3-beta-glucuronosyltransferase activity. Involved in glycosaminoglycan biosynthetic process. |
| 17_12938543 | 17 | 12938543 | 1.19E-04 | 12920000 | 12970000 | 0.0967 | ZNF266 | This gene encodes a protein containing many tandem zinc-finger motifs. |
| 17_12958572 | 17 | 12958572 | 3.65E-05 | 12920000 | 12970000 | 0.0967 | ZNF266 | This gene encodes a protein containing many tandem zinc-finger motifs. |
| 6_115070143 | 6 | 115070143 | 9.10E-05 | 115030000 | 115080000 | 0.0968 | ZNF608-ENSSCRG00010008352 | This gene encodes a protein that is clearly involved in kinetochore function although an exact role is not known. |
| 5_109871841 | 5 | 109871841 | 1.34E-05 | 109840000 | 109890000 | 0.1093 | ZWINT-ENSSCRG00010006283 | This gene encodes a protein that is clearly involved in kinetochore function although an exact role is not known. |
| 5_109897677 | 5 | 109897677 | 3.82E-04 | 109860000 | 109910000 | 0.1021 | ZWINT-ENSSCRG00010006283 | This gene encodes a protein that is clearly involved in kinetochore function although an exact role is not known. |
| 5_109838653 | 5 | 109838653 | 4.47E-06 | 109830000 | 109880000 | 0.0979 | ZWINT-ENSSCRG00010006283 | This gene encodes a protein that is clearly involved in kinetochore function although an exact role is not known. |
| 6_60761000 | 6 | 60761000 | 1.84E-04 | 60760000 | 60810000 | 0.0913 | UTP15 | Predicted to be involved in positive regulation of RNA metabolic process and ribosome biogenesis. |
